# Supplementary material for: Assessment of hospital length of stay and direct costs of type 2 diabetes in Hubei Province, China
Source: BMC Health Serv Res. 2017 Mar 14;17:199. doi: 10.1186/s12913-017-2140-4 (PMC5348848; doi:10.1186/s12913-017-2140-4)
Supplement: Additional file 1: — LOS and direct costs of type2 diabetes. Title of data: Sheet1 (LOS and direct costs of all type2 diabetes patients); Sheet2 (LOS and direct costs of type2 diabetes patients with chronic complications). Description of data: Basic information such as type of medical insurance, gender, age, occupation, method of admission, LOS, type of complications and cost information for drugs, accommodation, imaging, therapeutics, laboratory analysis, sanitary materials, diagnostics, and nursing care are included. (XLSX 540 kb) [file 12913_2017_2140_MOESM1_ESM.xlsx]

## Sheet: LOS and costs of all patients
Type of medical insurance	Gender	Age	Age group	Occupation	Mode of Admission	Year of admission	LOS	LOS values	Type of chronic complications	Drugs	Accommodation	Imaging	Therapeutics	Labo analysis	Sanitary materials	Diagnostics	Nursing care	Total costs
5	2	85	7	5	2	2	26	4	0	49.5914	6.60797	2.34325	2.31982	48.2944	3.37428	1.12476	1.05446	114.71
5	2	81	7	5	2	2	14	2	0	57.1069	5.99872	6.91259	7.7093	27.8847	2.58203	1.68714	0.84357	110.725
5	2	84	7	5	2	2	23	4	0	70.4044	8.81062	11.8334	12.8879	18.2774	7.56355	1.68714	1.12476	132.589
5	2	85	7	5	2	2	24	4	0	108.485	32.9996	23.4533	10.8899	25.4804	7.84778	2.63997	1.31999	213.116
5	2	85	7	5	2	2	25	4	0	522.431	24.0897	31.1139	96.2175	58.4329	26.1923	4.14852	21.4262	784.052
2	2	53	4	5	2	1	5	1	0	49.9539	7.86348	8.65222	4.82803	10.5882	2.25627	1.33846	0.669232	86.1498
5	1	54	4	5	2	1	14	2	0	28.456	5.61677	0	5.66457	21.6545	1.23497	0.956046	0.478023	64.0608
5	1	54	4	5	2	1	11	2	0	3.66453	6.88353	27.8449	2.31841	24.6182	2.95801	1.72088	0.860442	70.8689
5	1	80	7	5	2	2	2	1	0	18.6542	1.33565	45.9277	8.59973	39.7415	1.5981	0.18746	0.09373	116.138
5	1	84	7	5	2	2	26	4	0	40.2334	5.75136	0	2.40426	18.9041	4.03727	0.942847	0.542137	72.8153
5	1	40	3	5	3	1	1	1	0	56.8403	4.2066	22.9451	26.2196	34.1787	5.86678	1.52967	0.764837	152.552
5	1	84	7	5	2	2	26	4	0	69.6278	8.81062	1.17163	9.70106	47.568	5.09235	1.68714	0.84357	144.502
5	1	84	7	5	2	2	27	4	0	436.752	36.276	47.4959	120.92	74.037	20.8911	5.09137	5.09137	746.554
2	1	53	4	5	2	1	5	1	0	6.82545	2.24671	9.94288	0.812639	0.717035	0.0630991	0.382419	0.191209	21.1814
2	1	53	4	5	2	1	9	2	0	43.176	8.222	20.0053	1.60138	7.64837	4.81752	1.33846	1.43407	88.2431
2	1	53	4	5	2	2	4	1	0	93.6775	6.36421	18.6684	28.4975	48.8395	13.2593	1.13142	1.34356	211.781
2	1	53	4	5	2	1	8	2	0	326.579	13.1934	24.2597	9.82338	27.5102	13.1385	3.44177	1.72088	419.667
2	1	53	4	5	2	1	6	1	0	77.0492	14.6036	17.7108	8.38931	47.6589	8.79587	2.48572	1.24286	177.936
2	1	43	3	5	2	2	13	2	0	0	29.525	18.8632	1.47625	65.4236	0.272754	0.56238	0.56238	116.685
2	1	50	4	5	2	1	10	2	0	19.8317	4.49342	15.6075	1.50577	21.5349	3.17503	0.764837	0.382419	67.2956
2	1	51	4	5	2	1	11	2	0	24.4202	1.19506	4.40531	2.8822	6.02216	1.86429	0.56238	0.28119	41.6328
5	2	54	4	4	2	1	16	3	0	65.6436	3.82419	0	16.3006	23.8773	23.7926	0.956046	0.693134	135.087
5	2	84	7	4	2	2	23	4	0	4.6783	3.30398	7.14692	2.0152	34.563	2.41683	0.56238	0.421785	55.1083
5	2	81	7	4	2	2	17	3	0	7.81856	2.35712	0	0	69.6528	0.188805	0.188569	0.188569	80.3944
5	2	81	7	4	2	2	20	3	0	15.0758	5.34261	39.3666	0.140595	48.5053	0.707662	0.74984	1.12476	111.013
5	2	81	7	4	2	2	14	2	0	22.214	0	0	0	0	6.36427	0	0	28.5783
5	2	81	7	4	2	2	14	2	0	22.7108	1.33565	0	0.702975	0	2.4801	0.18746	0.37492	27.7919
5	2	81	7	4	2	2	14	2	0	22.8779	1.33565	2.46041	0.328055	14.8796	5.11063	0.18746	0.18746	47.3672
5	2	76	6	4	2	2	9	2	0	26.2147	2.20266	9.95882	3.02279	28.8689	2.22304	0.56238	0.28119	73.3344
5	2	81	7	4	2	2	16	3	0	27.8163	3.98353	3.98353	7.7093	21.3236	1.87882	0.37492	0.585813	67.6557
5	2	90	8	4	2	1	23	4	0	44.0558	7.86348	11.8311	2.0555	54.7576	2.17596	1.33846	0.669232	124.747
5	2	81	7	4	2	2	17	3	0	53.5864	13.2159	11.5054	9.70106	34.2115	5.49516	2.43698	1.21849	131.371
5	2	81	7	4	2	2	14	2	0	55.1313	129.641	68.9457	5.9635	111.256	5.96963	2.07426	2.07426	381.056
5	2	84	7	4	2	2	23	4	0	57.4052	7.35781	7.02975	11.3179	20.5034	6.73263	1.31222	0.65611	112.315
5	2	81	7	4	2	2	18	3	0	58.8653	9.91195	21.1127	8.34197	25.8929	5.40729	1.68714	0.84357	132.063
5	2	85	7	4	2	1	23	4	0	61.273	6.74013	0	9.22585	31.5734	4.27257	1.33846	1.17116	115.595
5	2	54	4	4	2	1	15	3	0	65.1199	11.0133	37.7732	18.4883	19.3084	4.18341	2.06206	1.03103	158.98
5	2	90	8	4	2	1	22	4	0	68.2022	10.1102	18.0693	10.8511	38.9828	3.37771	1.91209	0.956046	152.461
5	2	78	6	4	2	2	15	3	0	69.703	7.99049	14.8796	11.6928	28.4002	6.76356	1.49968	0.74984	141.679
5	2	88	7	4	2	2	11	2	0	69.842	7.7093	1.0779	8.10765	23.1748	3.21916	1.49968	0.74984	115.38
5	2	92	8	4	2	2	15	3	0	70.4142	8.01392	13.0285	54.1291	49.3254	1.67003	1.68714	1.68714	199.955
5	2	73	6	4	2	2	23	4	0	70.75	9.20898	18.2774	12.9347	40.4445	6.01466	1.68714	0.84357	160.161
5	2	84	7	4	2	2	18	3	0	71.2414	16.0278	40.3039	10.5212	68.751	15.697	2.24952	1.12476	225.917
5	2	92	8	4	2	2	16	3	0	71.9362	11.0133	25.682	15.6295	50.6377	7.06209	1.8746	1.8746	185.71
5	2	92	8	4	2	2	17	3	0	73.2146	13.3565	7.84989	47.4508	22.8233	7.60197	1.8746	0.9373	175.109
5	2	81	7	4	2	2	15	3	0	74.1733	1.34356	2.82854	0.259283	0	0	0.188569	0.188569	78.9818
5	2	85	7	4	2	1	18	3	0	77.1448	14.6036	22.8256	6.33381	23.9251	10.0514	2.48572	1.24286	158.613
5	2	85	7	4	2	1	25	4	0	88.044	7.86348	12.6676	3.89589	55.9526	3.22713	1.52967	0.764837	173.945
5	2	85	7	4	2	1	15	3	0	90.0263	12.1146	5.50664	5.83469	40.9132	3.70819	2.24952	1.12476	161.478
5	2	90	8	4	2	1	8	2	0	92.6681	16.3484	81.2878	60.8285	58.3427	5.66744	2.29451	2.29451	319.732
5	2	91	8	4	2	2	21	3	0	99.7674	13.0519	18.6523	13.3331	82.0372	18.5407	2.99936	2.99936	251.381
5	2	83	7	4	2	1	23	4	0	103.563	15.727	16.3723	9.27365	43.7391	4.36196	2.86814	1.43407	197.339
5	2	81	7	4	2	2	17	3	0	107.525	17.6212	20.6206	6.86573	22.9639	4.23285	2.99936	2.99936	185.828
5	2	83	7	4	2	1	19	3	0	126.558	16.8503	11.5921	31.8124	14.2451	8.23084	3.05935	1.52967	213.878
5	2	81	7	4	2	2	19	3	0	133.847	28.0487	23.3388	31.9385	75.4995	10.8781	3.93666	1.40595	308.893
5	2	81	7	4	2	2	17	3	0	181.818	30.5718	30.8782	5.84565	59.0693	7.3403	4.14852	2.07426	321.746
2	2	77	6	4	2	2	18	3	0	21.0358	2.67131	3.51488	6.04559	20.2691	2.99397	0.18746	0.74984	57.468
2	2	74	6	4	2	1	24	4	0	30.2938	5.61677	15.8943	8.03079	17.5196	4.82182	0.956046	0.62143	83.7544
2	2	85	7	4	2	1	25	4	0	37.3632	5.61677	16.3723	6.88353	19.4555	2.49193	1.14726	0.573628	89.9042
2	2	76	6	4	2	1	10	2	0	45.5198	5.61677	15.6792	2.72473	29.494	2.02777	1.14726	0.573628	102.783
2	2	85	7	4	2	1	6	1	0	61.3029	6.74013	28.3229	8.3176	35.7561	3.0235	1.33846	0.669232	145.471
2	2	78	6	4	2	2	3	1	0	76.9355	9.27927	16.5434	12.8879	34.563	6.81745	0.56238	0.74984	158.339
2	2	74	6	4	2	1	26	4	0	129.432	10.7794	0	9.79948	5.85578	4.11817	2.67693	1.33846	164.001
5	1	91	8	4	2	2	24	4	0	0	11.9506	0	10.3103	0	24.8366	2.8119	1.40595	51.3153
5	1	81	7	4	2	2	16	3	0	0	37.492	0	0.0702975	2.46041	0.0810765	0.37492	0.37492	40.8536
5	1	87	7	4	2	1	5	1	0	5.17788	2.99936	14.411	3.63204	20.7612	2.4105	0.74984	0.37492	50.5167
5	1	84	7	4	3	1	23	4	0	9.87883	4.0871	3.94369	5.99919	29.9004	0.699348	0.573628	0.286814	55.3689
5	1	87	7	4	2	2	15	3	0	10.665	2.26283	60.6957	0.424281	15.1798	1.82394	0.565708	0.282854	91.9002
5	1	91	8	4	2	1	28	4	0	20.1047	0	0	0.669232	0	1.37814	0.191209	0.0956046	22.4389
5	1	87	7	4	2	1	16	3	0	23.8988	2.39012	0	0	0	0	0.191209	0.0956046	26.5757
5	1	86	7	4	2	2	18	3	0	25.0095	2.34325	0	0.984165	0	6.36427	0.18746	0.18746	35.0761
5	1	81	7	4	2	2	10	2	0	25.3767	0.890435	0	0.702975	0	1.24005	0.18746	0.37492	28.7725
5	1	87	7	4	2	1	13	2	0	27.7673	5.50664	24.0183	7.68586	39.8587	3.94182	1.12476	0.702975	110.606
5	1	66	5	4	2	1	22	4	0	28.6804	6.74013	20.9135	1.12335	46.0336	2.00483	1.14726	0.573628	107.217
5	1	89	7	4	2	1	25	4	0	29.5861	4.49342	16.4918	3.77638	29.2789	1.80215	0.956046	0.478023	86.8628
5	1	88	7	4	2	2	22	4	0	30.9642	16.5199	45.8106	55.8162	44.428	8.28011	2.8119	1.40595	206.037
5	1	80	7	4	2	2	13	2	0	35.0539	9.373	4.80366	8.03735	57.0347	5.58865	1.49968	1.56998	122.961
5	1	86	7	4	2	2	19	3	0	35.7932	2.34325	0	0.702975	0	1.24005	0.18746	0.37492	40.6418
5	1	81	7	4	2	2	18	3	0	36.4832	1.33565	0	0.960733	0.351488	0.0684229	0.18746	0.09373	39.4807
5	1	85	7	4	2	2	17	3	0	50.2841	8.81062	38.195	17.1526	39.0386	8.36119	1.68714	0.84357	164.373
5	1	82	7	4	2	1	11	2	0	52.0546	7.93519	23.1841	5.32996	32.6968	4.87058	1.33846	1.55358	128.963
5	1	82	7	4	2	1	28	4	0	53.8546	7.86348	21.6305	2.24671	38.5287	3.23335	1.33846	0.669232	129.365
5	1	87	7	4	2	1	19	3	0	58.2242	5.50664	15.3483	7.26408	22.4952	4.42734	0.9373	0.46865	114.672
5	1	54	4	4	2	2	15	3	0	66.5537	15.4186	16.4028	4.38188	21.5813	8.99293	2.62444	1.40595	137.362
5	1	66	5	4	2	1	26	4	0	68.6797	6.74013	12.4286	2.53352	29.7569	4.83329	1.14726	0.573628	126.693
5	1	83	7	4	2	2	26	4	0	70.2326	13.2159	2.34325	7.92019	31.5167	7.02272	2.24952	2.24952	136.75
5	1	86	7	4	2	2	27	4	0	71.8082	6.06902	27.2989	13.0988	25.5414	4.30197	1.68714	0.84357	150.649
5	1	91	8	4	2	1	23	4	0	73.2253	0.860442	5.49727	9.99068	14.1495	4.41693	0.573628	0.286814	109.001
5	1	84	7	4	2	1	26	4	0	73.2893	8.98684	13.289	8.55662	37.3097	3.17168	1.52967	0.764837	146.898
5	1	75	6	4	2	2	12	2	0	74.9934	12.6067	16.0513	41.8036	54.7618	7.91339	2.06206	1.03103	211.223
5	1	55	4	4	2	1	17	3	0	85.5322	12.6437	30.9759	4.66073	60.1114	7.52193	2.1033	2.67693	206.226
5	1	87	7	4	2	1	27	4	0	86.7586	12.3569	59.9919	3.15495	31.9319	3.52494	2.29451	1.14726	201.161
5	1	86	7	4	2	2	16	3	0	87.6437	11.0133	26.8302	14.9265	29.0563	6.79918	1.8746	0.9373	179.081
5	1	86	7	4	2	2	15	3	0	89.2317	20.0348	11.8334	231.841	29.8999	8.21684	2.8119	1.31222	395.182
5	1	81	7	4	2	2	20	3	0	89.7676	11.0133	4.56934	13.1456	24.0183	5.97974	1.8746	1.8746	152.243
5	1	84	7	4	3	1	14	2	0	90.354	21.511	18.9775	6.35771	45.2688	3.24769	1.91209	0.956046	188.585
5	1	67	5	4	2	2	7	1	0	91.3847	6.74856	11.5991	17.2229	32.3134	5.82087	1.8746	0.9373	167.901
5	1	82	7	4	2	1	3	1	0	91.6103	16.6352	15.1772	6.76403	68.0466	6.49036	1.72088	1.79259	208.237
5	1	72	6	4	2	2	9	2	0	95.5198	10.404	13.9423	6.49081	31.8916	7.84005	2.24952	1.12476	169.463
5	1	91	8	4	2	1	21	3	0	97.0662	11.2335	8.1503	12.1179	43.7391	4.75872	1.91209	0.956046	179.934
5	1	84	7	4	2	1	15	3	0	99.8383	26.9605	45.8424	8.98684	45.1971	8.42946	4.58902	2.29451	242.138
5	1	82	7	4	2	1	15	3	0	104.462	52.5826	23.7817	109.372	73.0658	9.61663	4.2066	2.1033	379.19
5	1	83	7	4	2	1	27	4	0	126.111	11.2335	6.0948	7.81568	35.7322	2.55336	1.91209	0.956046	192.409
5	1	81	7	4	2	2	22	4	0	132.511	0	0	0	0	0.957687	0.18746	0	133.656
5	1	81	7	4	2	1	1	1	0	143.733	18.5473	20.9135	11.4009	63.7205	9.63575	3.25056	1.62528	272.827
5	1	84	7	4	4	1	4	1	0	152.249	19.6707	40.8949	31.191	48.7584	11.6685	3.44177	1.72088	309.596
5	1	91	8	4	2	1	29	5	0	155.236	19.097	23.0646	4.73243	44.1454	7.04893	3.44177	1.72088	258.487
5	1	91	8	4	2	1	27	4	0	173.698	25.8372	26.4108	13.6954	61.5694	13.8804	4.58902	2.29451	321.974
5	1	84	7	4	2	1	13	2	0	496.049	19.4555	41.4685	366.094	57.3867	35.3524	4.2066	4.2066	1024.22
4	1	82	7	4	2	1	22	4	0	0	1.36237	1.31456	1.9599	55.6897	0.128827	0	0.191209	60.6466
4	1	81	7	4	2	2	12	2	0	1.58263	4.10069	5.85813	1.38252	13.3331	0.591437	0.9373	0.46865	28.2545
4	1	88	7	4	2	2	21	3	0	16.4079	3.7492	0.9373	2.78847	57.1753	0.270645	1.31222	0.65611	83.2972
4	1	85	7	4	2	1	22	4	0	28.9969	0.908244	0	5.28216	17.2088	0.337484	0.191209	0.382419	53.3072
4	1	66	5	4	2	1	16	3	0	31.4907	4.49342	23.0646	2.84424	31.8124	2.10856	0.956046	0.478023	97.2481
4	1	85	7	4	2	1	8	2	0	42.3839	14.4124	9.56046	1.67308	0	0.774398	0.191209	0.191209	69.1867
4	1	91	8	4	2	1	19	3	0	339.815	24.4748	54.1361	26.2913	93.9077	34.084	4.39781	2.19891	579.306
2	1	66	5	4	2	2	8	2	0	0	2.34325	1.68714	1.40595	0	0	0.74984	0	6.18618
2	1	50	4	4	2	1	8	2	0	16.254	4.56512	3.27446	3.99149	25.4308	0.0917805	0.764837	0.382419	54.7549
2	1	66	5	4	2	1	7	1	0	33.9275	6.60797	6.7017	3.13996	2.46041	0.0323369	1.12476	0.56238	54.557
2	1	54	4	4	2	1	10	2	0	35.6301	6.93602	26.0101	50.4736	68.1886	12.8396	1.49968	1.49968	203.077
2	1	51	4	4	2	1	14	2	0	57.9345	7.17035	19.0014	13.5759	33.366	3.76515	1.33846	0.669232	136.821
2	1	67	5	4	2	2	6	1	0	60.7832	9.9706	28.7804	15.6041	25.3861	4.43185	1.69712	0.848562	147.502
2	1	78	6	4	2	2	15	3	0	83.102	7.7093	11.3648	10.076	28.4002	5.36651	1.49968	0.74984	148.268
2	1	80	7	4	2	1	21	3	0	137.545	14.6036	21.6305	36.9751	32.6251	8.66823	2.67693	1.33846	256.063
2	2	53	4	2	2	2	6	1	0	0	1.59341	6.51424	0	0	0	0.74984	0.37492	9.23241
2	2	54	4	2	2	1	9	2	0	8.23161	7.7093	20.6206	8.67003	40.4445	2.78074	1.31222	1.31222	91.0812
2	2	48	3	2	2	2	4	1	0	57.74	7.7093	28.4705	7.28751	44.1468	1.64567	1.31222	0.65611	148.968
2	2	51	4	2	2	1	13	2	0	73.6354	9.56046	21.272	2.29451	54.9966	3.19535	1.72088	0.860442	167.536
2	1	59	4	2	2	1	6	1	0	64.6598	3.34616	1.07555	8.2698	0	12.4097	0.764837	0.478023	91.0039
5	2	53	4	1	2	2	8	2	0	3.27094	1.10133	1.05446	0	0.351488	0	0.18746	0.09373	6.05941
5	2	85	7	1	2	1	13	2	0	6.80527	2.20266	32.4775	0.585813	52.934	0.9373	0.37492	0.18746	96.5049
5	2	86	7	1	2	2	15	3	0	17.8204	0.890435	0	0.9373	0	6.36427	0.18746	0.37492	26.5748
5	2	86	7	1	2	2	19	3	0	46.805	14.3173	24.2526	9.5136	18.043	6.80949	2.43698	1.21849	123.397
5	2	86	7	1	2	2	15	3	0	48.0448	6.60797	12.0912	9.72449	21.3236	3.27071	1.31222	0.65611	103.031
5	2	86	7	1	2	2	17	3	0	50.1992	6.60797	27.5566	2.48385	37.7263	2.65725	1.12476	0.56238	128.918
5	2	85	7	1	2	1	17	3	0	51.6481	2.99936	15.5826	1.35909	37.9841	1.96411	0.9373	0.46865	112.943
5	2	85	7	1	2	1	18	3	0	80.2491	8.81062	16.0513	10.5446	30.4623	4.74461	1.68714	0.84357	153.393
5	2	50	4	1	2	2	1	1	0	81.4938	9.91195	19.5661	6.81886	14.6922	4.58668	1.68714	0.84357	139.6
5	2	91	8	1	2	2	7	1	0	131.436	18.7226	15.5826	24.7916	54.1525	8.89615	3.18682	3.18682	259.956
4	2	87	7	1	2	1	13	2	0	81.7836	2.39012	0	0	0	0	0.191209	0.0956046	84.4605
2	2	54	4	1	2	2	10	2	0	37.4381	6.60797	5.6238	6.23305	31.0481	1.7415	1.31222	0.65611	90.6608
5	1	85	7	1	2	2	22	4	0	0	5.34261	22.2609	0.492083	66.1031	0.994944	0.74984	0.37492	96.3184
5	1	54	4	1	1	2	24	4	0	4.90044	5.50664	22.2609	1.96833	27.1583	1.83008	0.9373	0.46865	65.0306
5	1	57	4	1	2	1	13	2	0	9.19645	4.49342	10.0385	2.84424	5.78408	0.632903	0.764837	0.382419	34.1368
5	1	82	7	1	2	2	25	4	0	33.7784	6.74856	35.5003	2.69474	31.6339	1.69792	1.68714	0.84357	114.585
5	1	44	3	1	2	2	3	1	0	36.602	5.34261	16.9886	2.8119	47.5914	1.95802	0.9373	0.46865	112.701
5	1	45	3	1	2	2	5	1	0	37.5963	18.6991	13.4971	11.6694	46.6541	2.0869	2.62444	1.31222	134.14
5	1	55	4	1	2	2	14	2	0	63.1778	7.7093	7.17035	2.78847	32.4306	3.01623	1.49968	0.74984	118.542
5	1	52	4	1	2	1	5	1	0	67.4651	19.1209	7.88738	8.222	28.2034	3.31963	1.52967	1.52967	137.278
5	1	86	7	1	2	2	18	3	0	69.4458	15.4186	22.6124	6.13932	34.6801	2.69802	2.8119	1.40595	155.212
5	1	81	7	1	2	2	22	4	0	74.9231	8.81062	24.2526	7.54527	25.2837	4.82147	1.49968	0.74984	147.886
5	1	42	3	1	2	1	12	2	0	81.8964	8.98684	14.4841	3.96759	45.7946	3.68699	1.52967	0.764837	161.111
5	1	86	7	1	2	2	16	3	0	96.6111	2.34325	0	0	0	2.23054	0.18746	0.09373	101.466
5	1	92	8	1	2	2	18	3	0	106.587	7.4984	13.708	3.42115	45.6934	4.05429	1.8746	2.22609	185.063
5	1	55	4	1	2	1	21	3	0	12.3488	2.24671	3.77638	1.69698	10.6121	0.903464	0.382419	0.382419	32.3493
4	1	87	7	1	2	2	24	4	0	0	0.890435	41.2412	3.96009	49.6769	14.0241	0.18746	0.37492	110.355
4	1	50	4	1	2	1	1	1	0	33.4982	6.74013	0	1.84039	0	0.124764	1.14726	0.573628	43.9244
4	1	83	7	1	2	2	17	3	0	89.112	13.2159	7.96705	17.5041	33.8365	8.62644	2.24952	1.12476	173.636
2	1	53	4	1	2	1	9	2	0	1.07412	3.37006	14.6514	1.9838	23.0407	0.0630991	0.573628	0.286814	45.0436
2	1	53	4	1	2	2	7	1	0	51.4451	7.7093	21.6751	12.5833	34.0006	5.91062	1.49968	0.74984	135.573
2	1	53	4	1	2	2	6	1	0	53.8559	4.33501	11.3648	3.35085	16.6605	1.58943	0.9373	0.46865	92.5624
2	1	83	7	1	2	2	10	2	0	47.254	9.91195	20.0348	22.4483	112.007	3.78927	1.68714	1.68714	218.82
2	1	38	2	1	2	2	5	1	0	75.9495	9.91195	26.2444	8.99808	39.6712	3.5355	1.68714	0.84357	166.841
1	1	45	3	1	2	1	3	1	0	87.8392	6.74013	8.96293	3.29836	72.5161	0.848491	1.14726	0.573628	181.926
2	2	45	3	5	2	2	3	1	2	15.0955	5.50664	16.4262	1.0076	52.7231	0.806547	0.9373	0.9373	93.4402
5	1	45	3	5	2	2	5	1	2	93.1278	3.30398	18.8632	0.632678	30.9543	5.42463	0.56238	0.28119	153.15
5	1	50	4	5	2	2	6	1	2	64.3159	6.60797	14.1767	10.8727	21.8157	4.42804	1.31222	0.65611	124.185
2	1	37	2	5	2	2	36	6	2	65.9227	9.91195	39.7415	6.51424	34.9144	7.98111	1.68714	0.84357	167.517
2	1	50	4	5	2	1	12	2	2	38.6047	18.6429	3.58517	110.686	20.1248	1.83752	2.48572	2.48572	198.453
5	2	60	5	5	2	1	8	2	2	74.895	8.98684	22.3715	15.3445	38.8633	6.41651	1.72088	0.860442	169.459
5	2	51	4	5	2	1	7	1	2	172.743	15.727	2.86814	12.4764	39.8671	3.04071	2.67693	1.33846	250.738
5	2	71	6	5	2	2	7	1	2	125.26	12.092	16.9948	2.40426	55.6515	5.64199	1.69712	0.848562	220.591
5	2	63	5	5	2	1	9	2	2	54.4239	12.3569	2.1511	4.111	17.2327	3.09807	2.1033	1.05165	96.5287
5	2	60	5	5	2	1	23	4	2	66.5561	10.1819	32.6251	11.9984	29.6374	6.51474	1.72088	1.72088	160.955
5	2	38	2	5	2	1	7	1	2	66.2791	10.1102	17.8064	2.17501	35.9951	3.56079	1.72088	1.72088	139.368
5	2	56	4	5	2	1	8	2	2	106.361	11.2335	15.4162	11.616	21.7501	5.06705	2.1033	1.05165	174.599
5	2	81	7	5	2	2	14	2	2	43.6307	11.2906	19.5641	2.87568	36.3232	5.53074	1.88569	0.942847	122.043
5	2	81	7	5	2	2	12	2	2	79.2854	8.86276	15.7927	11.1492	18.5034	5.03504	1.69712	0.848562	141.174
5	2	81	7	5	2	2	15	3	2	85.0218	8.81062	16.6371	15.3014	45.4825	5.52	1.68714	0.84357	179.304
5	2	77	6	5	4	2	13	2	2	98.7174	12.1146	20.3863	19.0272	23.6668	4.10889	2.24952	1.12476	181.396
5	2	73	6	5	2	1	16	3	2	124.194	15.727	61.2109	12.0701	69.2178	11.4936	2.67693	2.67693	299.267
5	2	82	7	5	2	2	29	5	2	98.3191	13.2159	25.682	13.5674	20.5034	6.33264	2.24952	1.12476	180.995
5	2	50	4	5	2	1	9	2	2	44.5133	5.61677	20.2204	4.37391	33.2226	2.21229	0.956046	0.956046	112.071
5	2	53	4	5	2	2	11	2	2	48.0376	6.67827	13.5909	4.42874	33.7662	3.01811	0.9373	0.9373	111.394
5	2	57	4	5	2	1	17	3	2	219.42	13.0739	70.9864	13.552	34.2265	6.58023	2.67693	1.91209	362.428
5	2	49	3	5	2	1	10	2	2	61.9468	8.98684	12.5481	6.2143	21.8457	4.69299	1.52967	1.52967	119.294
5	2	82	7	5	2	2	17	3	2	36.0258	12.0209	49.7941	29.2672	56.238	9.73855	1.68714	0.84357	195.615
5	2	77	6	5	2	1	19	3	2	361.848	17.7108	54.7337	53.3713	17.5913	10.6315	2.48572	2.48572	520.857
5	2	70	6	5	2	2	12	2	2	408.431	15.9341	49.4895	290.516	64.6737	21.6676	3.18682	3.18682	857.085
5	2	66	5	5	2	1	9	2	2	92.1794	11.2335	6.95524	20.5789	51.8894	6.08763	2.1033	1.05165	192.079
5	2	78	6	5	2	1	12	2	2	91.3655	8.55662	27.0083	20.1248	0	231.772	3.25056	1.62528	383.703
5	2	54	4	5	2	1	9	2	2	89.8796	9.22585	42.2573	7.67227	72.062	1.89178	1.72088	1.72088	226.431
5	2	45	3	5	2	1	8	2	2	17.7244	8.98684	1.19506	20.0053	46.0097	4.74677	1.52967	0.764837	100.963
5	2	47	3	5	2	1	9	2	2	54.3137	7.86348	0	15.3206	16.5157	4.9485	1.52967	0.764837	101.257
5	2	66	5	5	2	1	15	3	2	100.888	10.1102	5.40166	4.1588	42.4485	4.20995	1.72088	0.860442	169.798
5	2	72	6	5	2	2	4	1	2	116.004	11.6442	128.345	147.108	110.926	63.4425	2.4514	5.60994	585.531
5	2	32	2	5	2	1	11	2	2	83.584	66.9232	66.8037	13.4325	93.095	7.04033	1.52967	1.52967	333.938
5	2	74	6	5	2	1	21	3	2	255.347	18.0454	5.73628	52.7021	56.574	18.3401	3.05935	3.05935	412.863
3	2	72	6	5	2	1	14	2	2	57.32	6.74013	16.8503	7.07474	48.1608	8.02601	1.33846	0.669232	146.18
3	2	73	6	5	2	2	11	2	2	75.5597	7.75491	13.5534	13.5063	22.6283	5.64435	1.31999	1.31999	141.287
2	2	57	4	5	2	1	3	1	2	60.5177	12.3569	25.4547	13.2412	22.4671	5.43871	2.29451	1.33846	143.109
2	2	79	6	5	2	2	25	4	2	186.238	17.7255	41.2495	71.8213	87.5904	9.55528	3.01711	3.01711	420.215
2	2	78	6	5	2	2	18	3	2	87.4846	12.1146	17.8087	8.71689	29.8764	4.11147	2.06206	1.03103	163.206
2	2	69	5	5	2	1	11	2	2	49.6327	9.56046	27.9883	11.1618	35.2781	5.49081	1.72088	0.860442	141.693
2	2	68	5	5	2	1	13	2	2	77.5738	11.2335	30.235	10.397	34.0592	4.65403	2.1033	1.05165	171.308
2	2	56	4	5	2	1	8	2	2	61.0558	5.61677	98.8074	2.77253	39.8193	3.31748	0.956046	0.478023	212.823
2	2	49	3	5	2	1	36	6	2	139.154	14.6036	3.70468	37.0707	75.6472	10.3291	2.67693	1.33846	284.524
2	2	52	4	5	2	1	9	2	2	148.729	13.4803	70.0304	14.1734	50.1924	8.49925	2.29451	1.14726	308.547
2	2	59	4	5	2	2	8	2	2	186.725	18.7226	35.4065	13.7783	82.3887	11.5635	3.18682	1.59341	353.365
2	2	72	6	5	2	2	8	2	2	143.792	32.8055	112.125	33.5319	60.5965	6.51541	2.62444	1.31222	393.303
2	2	55	4	5	2	1	14	2	2	232.79	26.9605	13.4325	56.7414	28.5858	150.97	4.78023	2.39012	516.65
2	2	45	3	5	2	2	2	1	2	99.4354	15.5805	20.5305	13.2706	24.9854	4.9754	2.63997	1.31999	182.738
2	2	80	7	5	2	1	9	2	2	71.8321	9.05854	22.3476	9.27365	75.7428	3.52901	1.72088	0.860442	194.365
2	2	77	6	5	2	1	9	2	2	56.456	10.1102	27.1517	12.1418	41.4924	6.20092	1.72088	0.860442	156.134
2	2	50	4	5	2	2	4	1	2	75.4581	9.91195	1.17163	13.9892	23.5497	4.91895	1.8746	0.9373	131.811
2	2	49	3	5	2	2	11	2	2	80.2856	8.81062	17.4338	3.84293	53.4027	0.655642	1.49968	0.74984	166.681
2	2	50	4	5	2	1	9	2	2	36.5327	3.37006	12.5481	1.52967	11.6399	2.45082	0.573628	0.286814	68.9317
2	2	60	5	5	2	2	9	2	2	59.1729	30.72	18.1602	285.619	0.820138	1.15265	4.31158	4.31158	404.268
2	2	60	5	5	2	2	9	2	2	162.637	16.6177	26.989	17.5605	48.8159	7.70871	3.01711	1.50855	284.854
2	2	49	3	5	2	1	16	3	2	75.389	12.3569	22.3715	6.2382	34.5372	3.91692	2.1033	1.05165	157.965
2	2	49	3	5	2	1	7	1	2	123.677	12.0462	23.0646	19.6946	19.1448	7.50903	2.48572	1.24286	208.864
2	2	78	6	5	2	2	11	2	2	92.584	9.91195	61.7447	14.2001	71.4926	4.56348	1.68714	1.68714	257.871
2	2	29	1	5	2	1	4	1	2	73.7786	6.1187	33.7245	5.18655	38.1224	3.32919	1.72088	0.860442	162.841
2	2	39	2	5	2	2	27	4	2	240.809	11.5757	22.6124	128.246	38.7105	5.10969	2.43698	2.43698	451.937
2	2	45	3	5	2	1	12	2	2	34.726	4.49342	12.333	1.93599	18.7624	3.97381	0.956046	0.478023	77.6587
2	2	45	3	5	2	2	10	2	2	42.8953	5.53922	10.2535	5.70422	27.319	3.26767	1.13142	0.565708	96.6759
2	2	47	3	5	2	1	5	1	2	71.0307	8.98684	0	15.4401	26.3391	5.80296	1.72088	0.860442	130.181
2	2	48	3	5	2	1	10	2	2	89.4099	12.3569	34.5372	14.9143	37.8833	8.75762	2.29451	1.14726	201.301
2	2	48	3	5	2	1	10	2	2	143.582	12.3569	30.9042	9.63217	33.366	4.47167	2.29451	1.14726	237.754
2	2	73	6	5	2	2	7	1	2	64.7924	11.0784	23.2647	21.1433	33.4946	6.99144	2.07426	1.03713	163.876
2	2	65	5	5	2	1	10	2	2	41.2587	19.097	47.874	21.5349	88.8645	3.64062	3.25056	1.62528	227.146
2	2	73	6	5	2	1	12	2	2	135.551	15.1055	67.7598	20.1726	101.46	15.2681	2.48572	2.48572	360.289
2	2	80	7	5	2	2	6	1	2	88.9976	11.8799	17.4427	10.442	41.9567	7.19958	2.26283	2.26283	182.444
1	2	52	4	5	2	1	9	2	2	56.6871	11.2335	11.1379	11.4487	30.235	6.46263	2.1033	1.05165	130.36
1	2	67	5	5	2	1	9	2	2	99.6559	20.7462	28.5619	28.8248	32.2905	54.1086	3.44177	3.34616	270.976
1	2	89	7	5	1	1	8	2	2	59.9728	11.2335	21.6545	7.43326	30.474	4.18175	1.91209	1.91209	138.774
1	2	57	4	5	2	2	6	1	2	59.9983	7.75491	14.0248	3.15854	41.3674	4.20627	1.31999	1.31999	133.15
6	1	46	3	5	1	1	28	4	2	73.8995	8.98684	57.2433	5.40166	30.7369	4.58807	1.72088	0.860442	183.438
6	1	51	4	5	2	1	6	1	2	123.455	13.4803	24.6421	5.47337	70.1738	5.21619	2.29451	1.14726	245.882
6	1	55	4	5	2	2	9	2	2	60.5484	8.81062	32.9227	11.4116	36.8125	6.63234	1.68714	1.40595	160.231
5	1	45	3	5	2	1	10	2	2	254.974	25.6698	79.9016	41.588	75.9818	8.55446	3.44177	3.44177	493.553
5	1	47	3	5	2	2	9	2	2	168.547	15.9107	70.7896	13.8486	73.6015	3.94369	2.62444	1.31222	350.578
5	1	45	3	5	2	1	1	1	2	87.0138	10.8989	3.84809	19.6468	55.5702	3.75416	1.52967	1.52967	183.791
5	1	79	6	5	2	2	19	3	2	95.8514	11.0133	28.6111	6.25648	54.1525	8.70705	1.8746	1.8746	208.341
5	1	53	4	5	2	2	14	2	2	126.907	11.0836	18.6288	25.3305	65.5642	6.98125	2.06206	1.49968	258.057
5	1	52	4	5	2	2	12	2	2	158.263	13.3565	13.2394	5.29575	62.682	10.7457	1.8746	1.8746	267.332
5	1	86	7	5	2	2	23	4	2	126.956	15.2311	23.6668	16.8245	39.0386	8.68081	2.43698	1.31222	234.147
5	1	42	3	5	2	1	20	3	2	72.0845	11.2335	12.4286	12.0701	29.6374	6.72196	1.91209	0.956046	147.044
5	1	48	3	5	2	1	9	2	2	41.4714	7.86348	31.5256	3.25056	72.301	1.15251	1.33846	0.669232	159.572
5	1	39	2	5	2	1	9	2	2	86.9127	16.8503	15.1772	15.9421	36.7122	6.5733	2.86814	2.86814	183.904
5	1	91	8	5	3	2	21	3	2	2.73378	5.2328	40.896	4.64352	43.7245	6.41371	1.13142	1.13142	105.907
5	1	39	2	5	2	1	9	2	2	75.8503	8.98684	14.2212	15.5119	26.6737	8.46722	1.72088	0.860442	152.292
5	1	40	3	5	2	1	3	1	2	131.701	14.6036	38.3853	19.5033	53.921	5.04362	2.67693	1.33846	267.174
5	1	55	4	5	2	1	15	3	2	432.578	42.6875	42.5919	23.8056	92.6409	12.6824	7.26595	7.26595	661.518
5	1	56	4	5	2	1	8	2	2	123.165	13.6237	24.0207	10.2775	25.8611	1.9881	2.29451	2.29451	203.525
5	1	66	5	5	2	1	13	2	2	76.2184	7.72007	15.6792	8.46101	23.5426	5.28502	2.1033	0.956046	139.966
5	1	56	4	5	2	1	11	2	2	59.8184	8.98684	28.0122	10.8272	38.3614	5.26973	1.72088	0.860442	153.857
5	1	68	5	5	2	1	23	4	2	99.5493	9.75167	7.64837	10.1102	29.2789	3.54717	1.91209	0.956046	162.754
5	1	57	4	5	2	1	27	4	2	80.7759	11.3052	0	15.2489	22.491	6.38926	1.91209	1.09945	139.222
5	1	56	4	5	2	2	7	1	2	100.8	10.4743	26.5256	12.5364	47.8023	5.65544	1.8746	0.9373	206.606
5	1	70	6	5	2	2	12	2	2	100.855	13.2941	20.9783	7.6842	22.4869	4.59826	2.4514	1.2257	173.574
5	1	29	1	5	2	1	10	2	2	60.8641	8.98684	15.4162	8.36541	30.235	2.8256	1.52967	0.764837	128.988
5	1	40	3	5	2	1	3	1	2	75.3264	10.7555	7.81568	20.4594	10.875	3.93939	1.91209	0.956046	132.04
5	1	42	3	5	2	1	28	4	2	131.536	16.8503	60.1353	22.013	52.3674	7.78987	3.05935	1.52967	295.281
5	1	45	3	5	2	2	8	2	2	24.4325	7.14206	2.47497	11.7856	11.4792	4.36302	1.31999	1.31999	64.3172
5	1	56	4	5	2	1	1	1	2	49.7813	4.70853	27.6058	4.0871	32.4339	2.59662	0.956046	0.478023	122.647
5	1	45	3	5	2	2	21	3	2	61.5038	7.75491	14.732	9.16918	47.1423	5.28348	1.50855	0.754277	147.848
5	1	44	3	5	2	1	13	2	2	65.6708	6.74013	16.3723	10.8033	30.0916	4.78358	1.33846	0.669232	136.469
5	1	42	3	5	2	1	1	1	2	71.5455	13.4803	28.7531	25.9328	63.7683	2.44748	2.48572	1.24286	209.656
5	1	45	3	5	2	1	8	2	2	82.036	11.3052	41.9465	5.64067	58.5578	4.81608	1.91209	0.956046	207.17
5	1	45	3	5	2	1	3	1	2	89.0796	11.2335	21.1764	2.72473	39.4608	5.82949	2.1033	1.05165	172.66
5	1	45	3	5	2	2	20	3	2	95.5929	8.24991	41.4852	10.2535	33.4475	5.55949	1.50855	0.848562	196.946
5	1	45	3	5	2	2	25	4	2	96.9604	12.1146	21.1361	10.6384	15.6998	3.21541	2.06206	1.03103	162.858
5	1	56	4	5	2	1	1	1	2	101.368	9.53656	31.908	11.6638	61.2109	4.46187	1.52967	0.764837	222.444
5	1	44	3	5	3	1	20	3	2	107.964	13.4803	15.1772	5.42556	49.9773	6.22291	2.29451	1.14726	201.689
5	1	34	2	5	2	1	12	2	2	118.056	14.6036	23.7339	14.5797	21.3676	4.26684	2.48572	1.24286	200.336
5	1	56	4	5	2	1	5	1	2	122.754	12.3569	40.1778	15.8704	58.3427	7.24325	2.1033	1.05165	259.9
5	1	49	3	5	2	1	9	2	2	124.084	18.1171	35.2542	22.969	37.4531	14.5312	3.05935	3.05935	258.527
5	1	44	3	5	2	1	1	1	2	136.469	14.6036	32.3861	3.48957	53.8971	4.24724	2.48572	1.24286	248.821
5	1	56	4	5	2	1	1	1	2	140.315	14.6753	42.066	7.60057	92.7843	10.3626	2.48572	2.39012	312.68
5	1	57	4	5	2	1	7	1	2	141.84	13.4803	61.187	18.5712	70.5323	7.47891	2.48572	2.0077	317.583
5	1	49	3	5	3	1	12	2	2	162.964	20.316	5.61677	21.7023	18.5234	7.16676	3.44177	3.15495	242.886
5	1	57	4	5	3	1	2	1	2	166.188	20.1726	24.1402	24.4987	46.1292	10.494	3.25056	1.62528	296.498
5	1	49	3	5	2	1	3	1	2	188.272	10.0385	27.7253	15.8226	44.0737	7.01571	1.91209	1.91209	296.772
5	1	44	3	5	2	1	1	1	2	263.987	76.4837	39.8193	81.0966	123.449	16.8341	6.1187	3.05935	610.848
5	1	55	4	5	2	2	12	2	2	357.781	24.2292	42.7643	30.8606	118.147	14.1814	4.31158	2.15579	594.431
5	1	51	4	5	2	2	12	2	2	187.144	15.4186	13.4737	22.8936	21.4407	8.23442	2.8119	1.40595	272.823
5	1	51	4	5	2	2	15	3	2	11.8551	5.53922	0	2.47497	0	0.536244	0.942847	0.471423	21.8198
5	1	81	7	5	2	2	1	1	2	85.2918	11.0133	19.0038	10.3572	29.525	4.51146	2.06206	1.03103	162.795
5	1	67	5	5	2	1	15	3	2	39.5335	5.97529	14.9382	6.81183	29.5179	3.39396	1.14726	0.573628	101.892
5	1	58	4	5	2	1	12	2	2	86.8169	7.93519	15.3684	1.86429	20.2204	2.7907	1.52967	0.764837	137.29
5	1	51	4	5	2	2	16	3	2	141.923	12.0209	18.8632	5.20202	80.3735	4.68486	1.68714	1.68714	266.442
5	1	76	6	5	2	1	9	2	2	55.162	2.86814	3.22666	5.35386	2.50962	4.32802	0.382419	0.573628	74.4043
5	1	51	4	5	2	2	11	2	2	31.0771	4.40531	16.8714	3.49144	44.5452	1.85796	0.74984	0.37492	103.373
5	1	56	4	5	2	2	21	3	2	88.2264	8.5763	19.0975	22.2609	30.5794	2.43956	1.49968	0.74984	173.43
5	1	54	4	5	2	1	9	2	2	80.2637	10.1102	26.0523	6.45331	45.7707	2.29356	1.72088	0.860442	173.525
5	1	52	4	5	2	2	9	2	2	102.103	11.0133	24.9556	14.0829	18.1368	6.41067	2.06206	1.03103	179.795
5	1	55	4	5	2	2	15	3	2	114.817	11.0133	42.3425	5.01456	80.8422	5.04549	1.8746	1.8746	262.824
5	1	51	4	5	2	2	11	2	2	154.225	155.826	80.725	13.1456	84.6195	51.301	3.56174	8.90435	552.308
5	1	29	1	5	2	1	6	1	2	199.973	23.6382	19.9814	9.10634	98.2816	13.9874	4.2066	4.78023	373.955
5	1	44	3	5	2	1	10	2	2	188.278	14.6036	25.5981	108.392	54.6381	16.7509	2.48572	3.72858	414.474
5	1	50	4	5	2	1	11	2	2	42.8218	6.74013	25.8133	3.82419	53.5625	5.05127	1.33846	0.669232	139.821
5	1	50	4	5	2	1	4	1	2	56.504	5.97529	13.3846	9.63217	27.4624	4.09355	1.14726	0.573628	118.773
5	1	50	4	5	2	1	13	2	2	66.7808	8.3176	33.2465	3.20276	40.0583	6.78172	1.91209	0.956046	161.256
5	1	50	4	5	2	1	9	2	2	86.5217	16.8503	7.05084	37.8833	20.7223	8.34915	3.05935	1.91209	182.349
5	1	49	3	5	2	1	8	2	2	27.439	31.3344	22.7061	21.0091	37.3336	6.87923	4.39781	2.19891	153.298
5	1	50	4	5	2	1	11	2	2	40.652	5.61677	23.0646	5.25826	25.7894	2.09016	1.14726	0.573628	104.192
5	1	45	3	5	2	2	7	1	2	83.5869	12.2099	12.1391	5.49208	35.616	9.71415	2.63997	1.31999	162.718
5	1	46	3	5	2	2	12	2	2	109.633	11.5757	10.6618	167.988	36.3204	0.399524	2.43698	2.43698	341.452
5	1	51	4	5	2	1	3	1	2	112.639	13.6954	35.8756	17.9259	34.9196	7.23679	2.48572	1.24286	226.021
5	1	49	3	5	2	2	12	2	2	155.632	22.0031	52.0202	42.9284	93.3786	5.53734	3.37428	2.99936	377.873
5	1	46	3	5	2	1	7	1	2	161.825	20.8896	17.7825	268.769	28.3468	1.83322	4.39781	4.39781	508.242
5	1	47	3	5	2	2	11	2	2	308.595	17.8087	13.8252	280.932	22.9639	3.18542	3.7492	3.7492	654.809
5	1	48	3	5	2	2	12	2	2	457.362	24.184	41.9567	150.243	73.4525	331.965	5.09137	15.3684	1099.62
5	1	60	5	5	2	2	8	2	2	180.722	15.5098	35.946	23.2412	37.2896	8.25226	2.82854	1.41427	305.203
5	1	79	6	5	2	1	7	1	2	200.274	22.4671	13.0261	5.06705	55.9048	6.13423	4.01539	2.0077	308.896
5	1	51	4	5	2	2	4	1	2	128.737	18.6757	26.3499	23.8777	60.8777	8.92685	2.99936	1.59341	272.038
5	1	51	4	5	2	2	10	2	2	153.528	11.107	58.6047	48.5522	64.2519	97.023	2.24952	2.15579	437.472
5	1	49	3	5	2	1	15	3	2	30.8401	5.61677	1.31456	2.82034	9.56046	4.58807	0.956046	0.478023	56.1744
5	1	49	3	5	2	1	22	4	2	36.8032	12.3569	21.272	12.1896	23.6621	4.26229	2.1033	2.1033	114.753
5	1	49	3	5	3	1	9	2	2	68.8898	7.93519	25.5742	9.08244	33.1031	3.59784	1.52967	0.764837	150.477
5	1	32	2	5	2	2	9	2	2	87.3428	28.0487	1.17163	30.556	34.4458	3.2126	3.93666	1.96833	190.683
5	1	43	3	5	2	1	2	1	2	68.935	6.1187	30.1155	15.3684	37.9311	4.25895	1.52967	0.764837	165.022
5	1	65	5	5	2	2	11	2	2	83.1086	10.2535	29.1104	21.0962	41.3674	5.72897	1.88569	0.942847	193.494
5	1	43	3	5	2	2	16	3	2	300.681	30.9309	2.46041	124.614	25.354	133.301	4.12412	4.12412	625.589
5	1	48	3	5	2	2	19	3	2	105.103	8.81062	18.582	6.16275	60.6433	1.4008	1.49968	0.74984	202.952
5	1	43	3	5	2	1	16	3	2	115.609	13.6237	4.89974	204.427	29.6613	3.23	1.91209	1.91209	375.274
5	1	50	4	5	2	1	8	2	2	68.7713	8.98684	20.9135	10.875	44.0976	5.30654	1.72088	0.860442	161.532
5	1	47	3	5	2	1	11	2	2	28.0724	7.86348	11.8311	11.2574	26.6976	2.56316	1.33846	0.812639	90.4363
5	1	46	3	5	2	2	9	2	2	28.4311	1.10784	2.59283	2.19212	38.7746	2.18575	0.377139	0.188569	75.8499
5	1	48	3	5	2	1	9	2	2	33.4487	7.50496	22.5866	8.222	32.6251	3.40496	1.33846	0.669232	109.8
5	1	46	3	5	2	2	11	2	2	39.2174	7.7093	22.7061	0.913868	70.7896	1.78931	1.31222	0.65611	145.094
5	1	46	3	5	2	2	14	2	2	58.5154	7.75491	30.7839	4.1721	38.0439	2.82995	1.50855	0.754277	144.363
5	1	46	3	5	2	1	11	2	2	68.2443	5.25826	0	7.79178	16.9937	0.646765	1.91209	2.1033	102.95
5	1	47	3	5	2	1	9	2	2	71.4592	7.86348	1.19506	5.37776	38.9828	5.06298	1.52967	0.764837	132.236
5	1	45	3	5	2	1	12	2	2	79.2359	7.64837	21.1764	6.81183	12.0701	5.242	1.91209	0.956046	135.053
5	1	48	3	5	2	1	7	1	2	86.6876	13.552	28.8726	16.4918	55.7136	8.05206	2.48572	1.24286	213.098
5	1	48	3	5	2	1	9	2	2	109.475	17.9737	27.8449	8.72392	28.06	5.079	3.05935	1.52967	201.745
5	1	62	5	5	2	1	11	2	2	43.8438	10.1102	40.0344	5.21045	27.8449	2.75102	1.91209	0.956046	132.663
5	1	64	5	5	2	2	11	2	2	178.371	45.1779	58.4641	13.3097	74.656	7.80115	3.93666	3.93666	385.653
4	1	60	5	5	2	1	10	2	2	149.604	23.5904	34.7762	16.1572	53.4191	7.31806	4.01539	2.0077	290.888
4	1	55	4	5	2	1	6	1	2	57.7474	8.98684	14.4841	14.8426	22.9451	4.85624	1.91209	0.956046	126.73
4	1	75	6	5	2	1	16	3	2	65.28	6.1187	13.7432	5.18655	35.3498	4.10479	1.72088	0.860442	132.364
4	1	65	5	5	2	2	10	2	2	131.124	11.0133	7.52184	11.4116	73.1563	8.02423	2.06206	1.03103	245.344
3	1	73	6	5	2	1	21	3	2	104.576	13.0739	11.1379	11.9984	31.5256	6.19088	2.1033	1.05165	181.658
3	1	51	4	5	2	1	11	2	2	90.0887	19.4077	51.746	2.43792	59.0598	5.19085	1.91209	0.956046	230.799
2	1	50	4	5	2	2	11	2	2	147.399	14.402	46.0345	16.1698	74.2256	3.88853	2.4514	1.2257	305.796
2	1	56	4	5	2	1	20	3	2	61.0624	7.86348	23.8295	13.4803	26.9127	4.94228	1.33846	0.740936	140.17
2	1	38	2	5	2	1	16	3	2	60.7046	8.98684	3.34616	5.42556	35.6127	2.5634	1.52967	1.52967	119.699
2	1	70	6	5	2	1	11	2	2	106.453	10.1819	17.5674	10.8511	32.6251	3.74149	2.1033	1.05165	184.575
2	1	44	3	5	2	1	11	2	2	149.801	13.4803	9.67997	9.05854	89.0079	6.61297	2.29451	1.14726	281.083
2	1	57	4	5	2	2	12	2	2	215.485	25.8695	39.4838	16.7308	89.0435	7.81755	3.56174	2.20266	400.195
2	1	68	5	5	2	1	17	3	2	134.068	11.6638	43.285	18.3083	25.8372	12.7964	2.1033	1.05165	249.113
2	1	46	3	5	2	1	14	2	2	62.4305	10.1102	22.2281	9.60827	45.5556	4.45231	1.72088	0.860442	156.966
2	1	65	5	5	2	2	5	1	2	61.3772	6.64707	24.1604	3.72424	64.4907	3.08924	1.13142	0.565708	165.186
2	1	68	5	5	2	2	9	2	2	67.8486	13.2159	18.2305	10.1463	33.9771	3.45864	2.43698	1.21849	150.533
2	1	51	4	5	2	1	8	2	2	137.842	12.3569	22.7061	55.857	38.3614	13.5032	2.29451	1.14726	284.069
2	1	58	4	5	2	2	8	2	2	212.901	24.2292	45.6934	18.582	91.7383	21.2898	4.12412	4.21785	422.776
2	1	62	5	5	2	2	13	2	2	147.713	16.2153	75.1012	79.5534	51.903	37.9916	3.18682	1.59341	413.258
2	1	67	5	5	2	1	9	2	2	131.094	10.1102	14.5797	11.5443	19.8619	3.61672	1.91209	0.956046	193.674
2	1	55	4	5	2	1	14	2	2	62.0842	11.2335	26.7693	13.7432	33.3421	6.45379	2.1033	1.05165	156.781
2	1	56	4	5	2	1	4	1	2	85.0683	13.4803	33.2465	11.114	41.8509	5.14783	2.29451	1.14726	193.35
2	1	74	6	5	2	2	8	2	2	185.533	14.402	19.4462	3.5121	44.3138	5.77187	2.4514	2.00355	277.434
2	1	57	4	5	2	1	8	2	2	129.376	11.2335	30.952	11.9028	67.2818	5.25587	2.1033	1.05165	259.157
2	1	50	4	5	2	2	6	1	2	66.9438	8.86276	15.6748	3.41782	46.9302	4.91459	1.69712	0.848562	149.29
2	1	50	4	5	2	1	10	2	2	28.6312	10.1102	15.4162	1.9838	31.5495	2.91068	1.91209	0.956046	93.4698
2	1	50	4	5	2	1	6	1	2	94.8274	13.0739	21.6305	16.3484	33.7484	6.03265	2.1033	1.05165	188.816
2	1	53	4	5	2	2	13	2	2	19.5556	8.81062	1.17163	0.140595	43.3736	2.6863	1.49968	0.74984	77.9878
2	1	52	4	5	2	1	10	2	2	51.9647	7.86348	10.3014	12.3569	13.9822	4.45852	1.52967	0.764837	103.222
2	1	56	4	5	2	1	8	2	2	92.3096	20.4833	2.0316	12.1657	52.0089	7.74876	3.63298	1.81649	192.197
2	1	55	4	5	2	2	9	2	2	127.602	15.5098	8.03777	18.5741	54.8265	8.99853	2.63997	1.31999	237.509
2	1	53	4	5	2	2	7	1	2	186.435	9.34957	29.6421	33.7897	49.138	10.9055	1.31222	1.96833	322.54
2	1	36	2	5	2	1	8	2	2	117.162	14.986	42.066	7.72007	76.1491	7.72151	2.1033	1.05165	268.96
2	1	50	4	5	2	2	11	2	2	178.753	25.9867	87.7547	7.92019	85.2006	8.51303	2.06206	1.03103	397.221
2	1	44	3	5	2	1	9	2	2	249.926	14.986	81.2639	22.5866	59.0598	17.3881	2.1033	3.15495	450.469
2	1	53	4	5	2	1	12	2	2	30.6891	4.30221	63.0991	6.71623	70.1977	2.62769	0.573628	0.286814	178.492
2	1	49	3	5	2	1	13	2	2	47.2963	6.74013	8.86733	3.84809	17.9498	2.00818	1.14726	0.573628	88.4307
2	1	50	4	5	1	1	9	2	2	102.035	15.727	12.7871	17.3761	33.1748	7.11753	2.86814	1.43407	192.52
2	1	50	4	5	2	1	8	2	2	134.993	12.2374	25.5742	27.821	26.0523	8.25331	3.25056	1.62528	239.807
2	1	49	3	5	2	1	8	2	2	55.0047	10.1102	15.6792	10.1819	30.1155	5.74536	1.91209	0.956046	129.705
2	1	44	3	5	2	2	8	2	2	65.328	12.092	32.6696	24.6083	47.7787	3.39425	1.69712	1.69712	189.265
2	1	43	3	5	2	1	11	2	2	67.9223	8.98684	24.7377	10.2775	25.6937	5.65812	1.72088	0.860442	145.858
2	1	48	3	5	2	2	11	2	2	73.4539	8.86276	20.4598	7.5192	41.9331	0.930118	1.50855	0.754277	155.422
2	1	49	3	5	2	2	13	2	2	80.9115	11.1539	4.80366	20.6909	30.4623	7.01148	1.8746	0.9373	157.846
2	1	43	3	5	2	1	8	2	2	85.9271	12.3569	15.6792	10.4926	33.2226	3.53259	2.1033	1.05165	164.366
2	1	45	3	5	2	2	10	2	2	127.622	98.6977	13.4737	5.06142	43.2564	4.06835	2.24952	1.12476	295.554
2	1	48	3	5	2	2	13	2	2	158.41	24.0418	4.24128	41.5224	20.4097	19.494	3.37428	5.06142	276.555
2	1	60	5	5	2	2	8	2	2	135.811	19.7055	12.7284	265.859	14.402	2.86272	4.14852	4.14852	459.666
2	1	30	2	5	2	1	10	2	2	105.448	20.4355	63.2186	10.636	51.9133	10.5997	2.86814	1.43407	266.553
2	1	62	5	5	2	2	15	3	2	181.032	14.411	30.5794	180.993	59.8935	24.5978	2.8119	4.21785	498.536
2	1	58	4	5	2	1	7	1	2	63.0355	14.3407	20.555	3.60908	56.4067	2.5058	1.14726	0.573628	162.174
2	1	49	3	5	2	1	15	3	2	16.347	8.1742	35.7322	54.5663	62.1669	1.10854	1.14726	1.14726	180.39
2	1	49	3	5	2	1	10	2	2	45.6868	7.86348	29.5179	6.42941	34.2026	2.75437	1.33846	0.669232	128.462
2	1	49	3	5	2	1	9	2	2	52.6911	6.74013	16.9698	2.65303	51.1485	2.62005	1.14726	0.573628	134.543
2	1	33	2	5	2	2	16	3	2	65.6328	32.8055	12.0912	77.3038	42.202	35.8799	2.62444	2.62444	271.164
2	1	28	1	5	2	2	10	2	2	176.262	17.6212	34.563	17.2229	64.1348	5.96896	3.18682	1.59341	320.553
2	1	45	3	5	2	1	11	2	2	47.7182	6.74013	26.0523	5.61677	44.0976	2.29834	1.33846	0.669232	134.531
2	1	65	5	5	2	2	7	1	2	98.4664	12.1863	18.8805	12.9406	31.9389	6.65885	2.26283	1.13142	184.466
2	1	48	3	5	2	2	7	1	2	102.45	22.0266	27.0645	10.4275	21.7688	4.63518	3.7492	1.8746	193.996
2	1	48	3	5	2	2	9	2	2	27.9983	6.60797	60.8074	7.61557	24.9791	1.56881	1.12476	0.56238	131.264
2	1	46	3	5	2	1	13	2	2	12.3748	4.0871	0.358517	28.7531	43.3806	0.284663	0.573628	0.573628	90.3861
2	1	48	3	5	2	1	11	2	2	35.3876	3.82419	13.8627	10.4448	44.5518	3.56056	1.14726	0.573628	113.352
2	1	45	3	5	2	2	9	2	2	59.7775	48.0366	9.72449	6.16275	47.9429	2.9136	0.9373	0.9373	176.433
2	1	47	3	5	2	1	13	2	2	64.4535	6.74013	3.94369	9.48876	26.1718	4.11387	1.33846	0.884343	117.135
2	1	45	3	5	2	2	3	1	2	71.5837	11.0784	6.01065	6.2935	35.1446	2.46979	1.88569	0.942847	135.409
2	1	48	3	5	2	1	13	2	2	81.8132	10.1102	33.8201	8.70002	36.4493	3.33087	1.91209	0.956046	177.092
2	1	46	3	5	2	2	5	1	2	89.8627	10.1592	16.877	11.6206	16.7591	3.16608	1.50855	0.754277	150.707
2	1	46	3	5	2	1	5	1	2	102.12	58.8447	4.54122	14.7709	39.9149	6.99515	1.33846	1.33846	229.863
2	1	47	3	5	2	1	9	2	2	124.757	16.8503	3.70468	25.1679	40.632	9.71582	2.86814	1.43407	225.13
2	1	52	4	5	2	2	7	1	2	138.643	17.7255	31.5854	10.3242	99.7296	9.49069	3.01711	1.50855	312.024
2	1	51	4	5	2	2	10	2	2	141.002	16.6177	1.29641	12.3277	28.6625	4.685	3.01711	1.50855	209.117
2	1	36	2	5	2	1	8	2	2	125.755	14.6036	84.634	35.8517	79.3758	11.6375	2.67693	1.33846	355.873
2	1	49	3	5	2	2	5	1	2	13.111	0	2.92906	0.421785	36.1798	0.225889	2.24952	2.24952	57.3665
2	1	43	3	5	2	2	12	2	2	67.5311	8.06134	13.9306	28.2383	17.7962	7.20382	1.69712	1.69712	146.156
2	1	73	6	5	2	1	13	2	2	203.7	26.2196	13.9822	135.173	47.7784	143.977	4.2066	4.56512	579.602
2	1	73	6	5	2	1	13	2	2	236.957	23.5904	35.8039	12.4286	82.1961	3.90497	4.01539	3.72858	402.625
2	1	63	5	5	2	1	11	2	2	36.5138	20.1009	0	11.5443	0	6.78363	3.25056	3.25056	81.4437
2	1	72	6	5	2	2	12	2	2	40.4115	25.6352	0	59.8701	0	42.6795	4.12412	4.12412	176.844
2	1	70	6	5	2	2	8	2	2	141.177	14.1427	44.1959	6.43493	23.5712	3.819	2.26283	1.13142	236.735
2	1	50	4	5	2	1	9	2	2	92.1251	6.81183	90.6332	20.5311	44.002	3.86099	0.956046	0.478023	259.398
2	1	62	5	5	2	2	8	2	2	0.737306	2.21569	12.6577	0	0	0.847148	0.377139	0.188569	17.0236
2	1	38	2	5	2	1	8	2	2	1.40826	13.6715	5.13875	48.2564	18.1649	5.05366	4.97144	4.97144	101.636
1	1	43	3	5	2	2	21	3	2	234.45	13.005	7.02975	165.996	75.2184	0.86091	2.8119	2.8119	502.184
5	2	22	1	6	2	2	17	3	2	27.3186	8.01392	9.95882	5.27231	71.4926	0.299467	1.12476	1.12476	124.605
6	2	39	2	5	2	1	8	2	2	62.8479	8.81062	13.38	8.90435	52.7466	2.82971	1.68714	0.84357	152.05
6	2	57	4	5	2	2	10	2	2	1.57573	0.872133	13.7891	0.542137	15.4863	0.00424281	0.377139	0.188569	32.8353
5	2	79	6	5	2	2	21	3	2	501.603	17.7853	25.6586	149.687	40.5851	4.76688	4.6865	4.6865	749.458
5	2	66	5	5	2	1	7	1	2	56.9858	8.81062	15.6061	10.4509	30.3685	5.92936	1.68714	1.12476	130.963
5	2	54	4	5	2	2	13	2	2	89.6033	10.7321	14.8796	11.4116	20.9487	6.20587	1.8746	0.9373	156.593
5	2	57	4	5	2	2	10	2	2	139.22	15.0202	33.8014	19.5427	83.7478	8.33073	2.43698	1.49968	303.6
5	2	67	5	5	2	2	5	1	2	261.941	16.5668	39.4838	13.4737	91.5508	12.1854	4.12412	4.12412	443.45
5	2	49	3	5	2	1	5	1	2	73.2268	7.7093	7.73273	10.2869	47.2399	2.85502	1.31222	0.65611	151.019
5	2	69	5	5	2	1	8	2	2	391.799	30.1872	48.2803	336.218	48.0652	39.0012	4.2066	8.03079	905.788
5	2	64	5	5	2	2	8	2	2	178.153	17.6212	41.5927	8.27168	77.8194	9.31114	2.99936	2.99936	338.768
2	2	71	6	5	2	1	11	2	2	56.5174	8.98684	17.3522	11.9267	21.1764	3.32417	1.52967	0.764837	121.578
2	2	58	4	5	2	2	6	1	2	130.292	13.2862	4.8271	10.6149	26.5959	4.77555	2.24952	1.12476	193.766
2	2	46	3	5	2	1	7	1	2	199.494	30.1155	17.6869	66.995	45.699	95.7117	4.01539	4.01539	463.733
2	2	57	4	5	2	2	13	2	2	94.8288	13.2159	19.3318	17.1526	34.9144	7.83443	2.24952	2.24952	191.777
2	2	26	1	5	2	2	9	2	2	67.9437	7.7093	36.6953	10.0057	41.1709	5.10852	1.49968	0.74984	170.883
2	2	65	5	5	2	1	11	2	2	63.3995	9.373	15.3483	15.5826	31.7511	2.78941	1.68714	0.84357	140.775
2	2	73	6	5	2	2	17	3	2	361.158	17.6212	14.411	14.1767	18.1368	1.59622	2.99936	2.99936	433.099
2	2	73	6	5	2	1	12	2	2	61.8662	8.98684	30.3784	7.28985	33.3421	5.37179	1.52967	1.52967	150.295
2	2	68	5	5	2	1	12	2	2	41.2464	16.1684	25.682	1.14819	53.9182	2.90797	2.8119	2.8119	146.695
1	2	72	6	5	2	1	9	2	2	160.91	18.1888	78.348	30.6652	76.9617	12.9955	3.25056	3.56127	384.881
1	2	54	4	5	2	2	7	1	2	75.4044	7.7093	14.6453	4.78023	34.1177	4.94238	1.31222	0.65611	143.568
1	2	34	2	5	2	1	11	2	2	7.92515	5.44946	52.9411	21.0569	37.0468	1.65731	0.764837	0.382419	127.224
1	2	66	5	5	2	2	9	2	2	176.764	22.0266	19.0975	19.3787	61.4166	9.0897	3.93666	1.96833	313.678
6	1	52	4	5	2	2	2	1	2	60.0927	12.1146	15.3717	11.271	31.8682	2.95203	2.06206	1.03103	136.763
6	1	50	4	5	2	2	12	2	2	145.696	17.6212	30.3685	10.5446	79.0847	9.42713	2.99936	2.99936	298.741
5	1	52	4	5	2	2	10	2	2	59.4469	7.7093	19.0975	2.92906	22.9639	3.02748	1.31222	1.31222	117.799
5	1	38	2	5	2	1	8	2	2	95.4891	9.91195	21.9094	2.13236	53.2152	3.77123	1.68714	1.68714	189.804
5	1	71	6	5	2	1	19	3	2	41.6203	6.74013	24.2597	4.49342	33.9157	2.66163	1.14726	0.573628	115.412
5	1	37	2	5	2	1	4	1	2	13.6213	3.37006	15.4401	0.549727	31.5973	1.26676	0.573628	0.286814	66.7057
5	1	71	6	5	2	2	10	2	2	53.9869	8.81062	21.9094	10.9898	42.9049	4.37321	1.68714	0.84357	145.506
5	1	62	5	5	2	1	7	1	2	260.835	20.2204	1.31456	6.59672	96.4651	3.13488	3.44177	3.72858	395.737
5	1	42	3	5	2	1	17	3	2	181.151	18.1171	28.2512	15.6553	33.9396	15.9801	3.05935	1.52967	297.683
5	1	41	3	5	2	2	2	1	2	91.9864	9.91195	54.7852	2.67131	62.3539	3.65828	1.68714	0.84357	227.898
5	1	56	4	5	2	2	3	1	2	94.799	9.91195	19.8239	4.10069	63.9942	3.76279	1.68714	0.84357	198.923
5	1	47	3	5	2	2	10	2	2	97.064	14.3876	33.0633	15.1374	45.5059	5.75409	2.43698	1.21849	214.568
5	1	51	4	5	3	2	7	1	2	204.486	18.7226	21.5813	5.45977	40.3039	5.60506	3.37428	1.68714	301.22
5	1	49	3	5	2	1	6	1	2	230.078	23.8295	23.4231	21.4393	20.555	9.37427	4.01539	2.0077	334.722
5	1	53	4	5	2	2	11	2	2	162.203	10.404	31.2824	43.0924	59.1202	15.9212	2.24952	2.24952	326.523
5	1	67	5	5	2	2	12	2	2	59.8105	21.0893	5.15515	49.0911	7.02975	84.7795	2.8119	2.8119	232.579
5	1	42	3	5	2	2	9	2	2	0	1.33565	37.6092	5.03799	47.8258	1.25481	0.18746	0.09373	93.3446
5	1	50	4	5	2	2	13	2	2	91.9916	15.2311	20.5034	11.5054	20.5269	4.26308	2.43698	1.21849	167.677
5	1	42	3	5	2	1	22	4	2	363.124	29.9702	59.7529	176.47	49.7004	60.8718	5.6238	3.46801	748.981
5	1	44	3	5	2	2	17	3	2	161.464	25.3774	0	6.13932	62.682	8.49054	3.56174	4.45218	272.167
5	1	50	4	5	2	2	11	2	2	157.29	15.4186	54.4806	6.51424	60.8308	8.50131	2.62444	1.31222	306.972
2	1	52	4	5	2	2	4	1	2	7.57341	6.64707	22.039	2.09783	85.2333	0.592815	1.13142	0.565708	125.881
2	1	68	5	5	2	2	12	2	2	99.6329	11.0133	21.6751	14.5282	21.2533	5.2292	2.06206	1.03103	176.425
2	1	66	5	5	2	1	10	2	2	106.913	8.98684	25.9328	18.2127	30.2589	7.55659	1.52967	0.764837	200.155
2	1	61	5	5	2	1	11	2	2	69.1358	12.3569	14.4602	8.1742	19.838	5.0398	2.29451	1.14726	132.447
2	1	56	4	5	2	2	6	1	2	72.63	11.0133	15.4889	10.6384	27.6504	3.24493	2.06206	1.03103	143.759
2	1	49	3	5	2	1	6	1	2	193.89	20.2204	79.3519	12.5481	83.917	8.18758	3.44177	2.29451	403.851
2	1	46	3	5	2	2	14	2	2	203.481	12.4661	0.702975	193.248	1.52311	1.60466	2.62444	2.62444	418.275
2	1	51	4	5	2	2	11	2	2	109.155	250.728	8.55287	9.11525	92.3944	8.99574	3.56174	3.56174	486.065
2	1	48	3	5	2	2	16	3	2	0	0	22.6124	0.351488	53.4261	0.718909	0.18746	0.09373	77.3901
2	1	45	3	5	2	1	8	2	2	75.591	10.1102	2.62913	8.93903	35.7561	2.65136	1.91209	0.956046	138.545
2	1	54	4	5	2	2	21	3	2	273.849	30.72	51.6687	56.8707	80.9593	9.15274	4.31158	4.31158	511.843
2	1	65	5	5	2	1	5	1	2	84.9161	9.91195	11.1304	16.6839	51.2938	3.73327	1.8746	0.9373	180.481
1	1	42	3	5	2	1	19	3	2	102.554	10.5446	19.3553	20.9955	81.8029	6.97117	1.8746	1.28879	245.387
1	1	42	3	5	2	1	24	4	2	88.8669	10.1102	33.7484	6.57282	61.9279	3.9652	1.72088	0.860442	207.773
1	1	43	3	5	2	1	30	5	2	116.392	13.4803	3.46567	13.552	10.4209	5.27833	2.29451	1.14726	166.031
1	1	54	4	5	1	1	10	2	2	75.7215	8.98684	20.9135	7.91128	18.1649	3.9456	1.72088	0.860442	138.225
1	1	49	3	5	2	2	8	2	2	735.646	10.6852	35.6174	100.783	13.2159	17.5156	2.24952	5.6238	921.337
6	2	64	5	4	2	2	9	2	2	49.1759	6.46737	18.5117	2.43698	66.8764	4.89411	1.49968	1.64028	151.502
6	2	79	6	4	2	2	24	4	2	24.229	5.27994	48.6155	2.9464	34.296	2.56831	1.31999	0.659993	119.915
6	2	66	5	4	2	2	16	3	2	83.7862	10.0525	20.316	12.3489	21.3236	5.56147	1.8746	0.9373	156.201
6	2	81	7	4	2	2	12	2	2	272.689	28.804	34.9089	12.0449	124.055	14.7291	5.09137	2.68711	495.009
6	2	58	4	4	2	2	3	1	2	53.3668	8.81062	24.0652	9.13868	33.5085	5.21795	1.49968	0.74984	136.357
6	2	65	5	4	2	1	15	3	2	63.8089	50.3358	73.1375	4.23051	50.0968	6.36631	1.14726	0.573628	249.697
5	2	50	4	4	2	1	15	3	2	37.8205	6.95524	21.2242	3.05935	87.789	1.97376	1.14726	0.573628	160.543
5	2	66	5	4	2	1	23	4	2	96.0275	9.56046	23.1363	23.2678	44.9581	9.96798	1.72088	1.72088	210.36
5	2	66	5	4	2	1	22	4	2	104.691	11.4487	14.6992	12.1657	19.6946	6.6885	1.91209	0.956046	172.256
5	2	66	5	4	2	1	4	1	2	110.066	14.6275	7.83958	6.71623	39.5803	2.02491	2.29451	1.14726	184.296
5	2	73	6	4	2	2	7	1	2	27.2347	9.91195	12.1849	9.53703	40.2102	3.3068	1.68714	0.84357	104.916
5	2	71	6	4	2	2	11	2	2	47.0014	8.01392	12.3021	5.24888	22.4952	2.78191	1.12476	0.56238	99.5305
5	2	73	6	4	2	2	9	2	2	86.8294	8.81062	37.8904	26.7131	54.9727	4.5684	1.68714	0.84357	222.315
5	2	72	6	4	2	1	12	2	2	87.4363	6.74856	38.898	12.5833	44.8967	3.8516	1.8746	0.9373	197.226
5	2	73	6	4	2	2	17	3	2	98.6771	10.1228	17.2463	3.8898	48.2007	4.2769	1.68714	0.84357	184.944
5	2	72	6	4	2	2	13	2	2	111.389	13.2159	30.0873	13.4034	39.9524	5.39698	2.43698	1.21849	217.101
5	2	71	6	4	2	2	7	1	2	122.184	11.0133	27.6504	6.44394	28.5877	1.35252	1.8746	0.9373	200.044
5	2	72	6	4	2	1	18	3	2	135.542	16.8503	24.0207	13.791	79.6626	5.24774	3.05935	1.52967	279.703
5	2	73	6	4	2	1	13	2	2	202.248	20.2204	38.0745	12.5242	82.7458	11.3626	3.44177	2.36621	372.984
5	2	79	6	4	2	2	22	4	2	166.368	14.3173	18.1602	7.28751	13.0519	1.61473	2.43698	1.40595	224.643
5	2	73	6	4	2	2	17	3	2	53.0643	4.40531	1.28879	2.20266	36.3204	1.68878	0.74984	0.74984	100.47
5	2	72	6	4	2	1	17	3	2	67.3095	10.1102	14.9382	12.5481	36.2103	3.21566	1.72088	0.860442	146.913
5	2	65	5	4	2	1	3	1	2	74.0929	8.98684	16.3723	12.094	31.1671	5.51973	1.72088	0.860442	150.814
5	2	72	6	4	2	1	10	2	2	84.1228	9.03464	15.5358	7.76788	12.8349	6.02453	1.72088	0.860442	137.902
5	2	73	6	4	2	1	15	3	2	127.752	15.727	29.6972	12.6198	20.9135	4.24724	2.67693	1.33846	214.973
5	2	86	7	4	2	2	15	3	2	41.9367	4.40531	20.5034	3.58517	38.5699	3.38037	0.74984	0.74984	113.881
5	2	86	7	4	2	2	16	3	2	55.2473	7.7093	37.8435	7.87332	22.4952	4.84936	1.31222	1.31222	138.642
5	2	86	7	4	2	2	17	3	2	73.6254	9.91195	41.4052	9.5839	49.4426	4.42359	1.68714	0.84357	190.923
5	2	59	4	4	2	2	10	2	2	0	5.34261	103.455	0.773273	95.2063	10.9355	0.74984	1.8746	218.337
5	2	59	4	4	2	2	11	2	2	52.6653	4.40531	0	3.21025	28.9391	3.72952	0.9373	0.74984	94.6366
5	2	60	5	4	2	1	23	4	2	95.635	12.3569	7.40936	17.6391	38.3614	7.2356	2.29451	1.14726	182.079
5	2	59	4	4	2	2	13	2	2	115.043	11.0133	22.9639	13.7783	97.3152	6.12338	2.06206	1.03103	269.33
5	2	62	5	4	2	2	10	2	2	286.319	11.7163	25.5414	62.7054	77.8428	20.6785	1.8746	1.8746	488.553
5	2	67	5	4	2	2	13	2	2	55.5186	7.77959	31.3058	6.25648	32.6649	3.91885	1.31222	0.65611	139.413
5	2	67	5	4	2	2	15	3	2	78.3553	11.0133	14.8796	6.02216	47.0056	4.10022	1.8746	1.8746	165.125
5	2	71	6	4	2	1	18	3	2	62.8586	7.86348	37.1424	9.96678	49.4993	4.54026	1.52967	0.764837	174.165
5	2	71	6	4	2	1	9	2	2	66.3814	8.98684	22.3715	12.333	27.7253	5.96812	1.72088	0.860442	146.348
5	2	70	6	4	2	1	9	2	2	95.0286	15.727	15.4401	9.13024	33.6767	5.39473	2.86814	1.43407	178.7
5	2	71	6	4	2	1	29	5	2	101.337	12.5003	25.5742	15.3684	47.2287	7.18182	2.29451	1.14726	212.632
5	2	86	7	4	2	2	16	3	2	120.957	8.81062	34.0006	17.2932	58.0423	5.91015	1.49968	1.03103	247.544
5	2	68	5	4	2	1	15	3	2	99.3681	13.4803	24.9767	25.6698	42.9504	8.03079	2.29451	1.14726	217.918
5	2	69	5	4	2	2	12	2	2	226.94	37.9607	3.28055	174.807	10.1931	71.9284	5.06142	12.0209	542.192
5	2	64	5	4	2	1	9	2	2	28.4431	5.6238	5.50664	49.1614	33.6022	0.586047	0.74984	1.21849	124.892
5	2	66	5	4	2	1	9	2	2	121.366	15.727	14.8426	21.5827	30.4023	9.69049	2.86814	1.43407	217.914
5	2	66	5	4	2	1	9	2	2	61.2618	4.58902	49.9534	7.31375	21.1525	3.2104	1.33846	0.669232	149.489
5	2	67	5	4	2	2	14	2	2	107.946	11.0133	27.791	30.6029	62.0024	6.27968	2.06206	1.03103	248.729
5	2	67	5	4	2	1	13	2	2	200.374	17.6212	13.4737	67.0404	42.53	14.4253	3.18682	1.59341	360.245
5	2	78	6	4	2	2	5	1	2	70.8582	9.9706	27.2247	5.16208	57.6551	7.16611	1.69712	0.848562	180.582
5	2	77	6	4	2	1	13	2	2	90.12	12.3569	17.8303	11.9506	35.5888	5.67414	2.29451	1.14726	176.963
5	2	75	6	4	2	2	10	2	2	95.9043	17.6212	19.0975	28.1424	39.9759	2.73739	2.99936	1.49968	207.978
5	2	79	6	4	2	1	8	2	2	96.0972	15.727	42.7353	9.91898	80.8337	6.77168	2.86814	1.43407	256.386
5	2	79	6	4	2	1	21	3	2	142.476	19.0731	22.3476	13.8388	28.3229	6.71121	2.86814	1.43407	237.072
5	2	56	4	4	2	2	11	2	2	57.6482	12.1146	33.157	11.0836	26.7131	4.29612	2.06206	1.03103	148.106
5	2	68	5	4	2	2	4	1	2	71.8923	8.10765	26.5959	10.1697	29.8764	6.12198	1.49968	0.74984	155.014
5	2	56	4	4	2	2	6	1	2	128.669	15.4186	28.7048	15.6529	32.5946	7.8124	2.62444	1.31222	232.789
5	2	80	7	4	2	1	11	2	2	40.729	5.61677	18.3083	1.45797	67.4252	2.05311	0.956046	0.478023	137.024
5	2	55	4	4	2	2	9	2	2	69.0228	8.81062	16.0513	5.67067	29.8764	3.12918	1.68714	0.84357	135.092
5	2	80	7	4	2	1	1	1	2	71.5168	11.2335	28.1078	14.747	27.2473	7.25066	2.1033	0.956046	163.162
5	2	65	5	4	2	2	13	2	2	89.5626	14.402	47.4252	19.5641	65.5514	5.42773	2.4514	1.2257	245.61
5	2	80	7	4	2	1	19	3	2	95.7002	11.2335	39.5803	17.1849	66.1106	18.1606	1.91209	0.956046	250.838
5	2	59	4	4	2	1	13	2	2	104.866	28.6814	15.1055	19.7663	29.3028	7.47102	2.29451	1.29066	208.779
5	2	55	4	4	2	1	6	1	2	110.801	12.3569	12.1896	13.7193	52.6065	5.56921	2.29451	1.14726	210.684
5	2	58	4	4	2	1	3	1	2	148.795	13.6237	38.7796	12.7154	54.0166	6.25708	2.48572	1.24286	277.916
5	2	58	4	4	2	2	9	2	2	182.044	13.9658	17.8087	45.7168	39.3666	16.8135	2.62444	1.31222	319.652
5	2	50	4	4	2	1	8	2	2	175.193	16.8503	8.74782	18.0454	26.6498	6.99515	3.05935	1.52967	257.071
5	2	77	6	4	1	2	3	1	2	114.257	18.7226	1.28879	8.62316	17.8321	1.57513	3.18682	1.59341	167.079
5	2	74	6	4	2	1	11	2	2	80.0053	8.98684	19.8619	8.00689	19.6946	4.74581	1.72088	0.860442	143.883
5	2	85	7	4	2	2	4	1	2	36.3689	6.60797	22.8467	5.74096	24.487	1.73307	1.31222	0.65611	99.7529
5	2	87	7	4	2	1	10	2	2	44.6017	7.09864	35.1586	7.81568	26.0523	2.95633	1.33846	0.669232	125.691
5	2	84	7	4	2	1	8	2	2	57.4617	9.05854	26.5542	8.74782	47.7067	4.19489	1.72088	0.860442	156.305
5	2	85	7	4	2	1	12	2	2	63.6964	6.88353	17.9498	10.7794	17.2088	5.16839	1.72088	0.860442	124.268
5	2	84	7	4	2	1	9	2	2	85.8054	7.64837	27.821	4.68463	52.1045	3.49578	2.1033	1.05165	184.715
5	2	79	6	4	2	1	10	2	2	53.5962	8.98684	30.952	7.19425	29.7569	2.7515	1.72088	0.860442	135.819
5	2	83	7	4	2	2	30	5	2	53.5974	7.7093	15.1374	10.6852	41.0303	5.93545	1.49968	0.74984	136.345
5	2	73	6	4	2	1	13	2	2	186.02	13.2173	26.8888	19.5272	47.7784	9.39172	2.1033	2.0077	306.935
5	2	67	5	4	2	1	11	2	2	218.497	26.4319	30.6029	31.7979	49.6301	12.0895	4.6865	4.6865	378.422
5	2	83	7	4	2	1	22	4	2	162.543	12.8349	47.7545	12.8588	86.8568	7.32905	0.956046	1.91209	333.045
5	2	87	7	4	2	2	19	3	2	232.146	11.3142	51.9744	12.752	69.5349	24.5395	2.82854	3.46496	408.555
5	2	52	4	4	2	2	11	2	2	102.65	14.3876	31.0715	11.2007	92.4647	7.94479	2.43698	2.43698	264.593
5	2	57	4	4	2	2	4	1	2	42.9684	6.60797	61.979	5.64723	57.9017	4.74415	1.31222	0.65611	181.817
5	2	55	4	4	2	1	19	3	2	71.3722	8.98684	2.62913	12.4525	27.7014	3.27255	1.72088	0.860442	128.996
5	2	87	7	4	1	1	11	2	2	133.442	11.0133	21.2064	3.21025	41.5927	5.65848	1.8746	0.9373	218.935
5	2	83	7	4	2	1	21	3	2	143.079	14.6036	6.0948	82.7219	27.2473	4.06965	2.48572	1.24286	281.544
5	2	60	5	4	2	1	10	2	2	90.8732	8.98684	54.3751	5.83188	63.2425	5.97577	1.72088	0.860442	231.867
5	2	74	6	4	2	2	8	2	2	63.6471	21.0893	20.5034	5.57694	33.9068	3.39115	1.68714	1.75744	151.559
5	2	76	6	4	2	2	13	2	2	84.7341	11.0133	12.3021	8.01392	22.4952	4.85545	1.8746	1.8746	147.163
5	2	78	6	4	2	1	10	2	2	8.21825	8.81062	44.7795	1.05446	36.4376	2.38871	1.49968	0.74984	103.939
5	2	79	6	4	2	1	13	2	2	29.5697	8.67003	6.91259	11.0836	18.1602	4.3786	1.68714	0.84357	81.3054
5	2	80	7	4	2	1	15	3	2	95.721	8.98684	32.6251	11.1618	46.6312	6.23486	1.72088	0.860442	203.942
5	2	79	6	4	2	1	50	6	2	105.915	10.1102	1.07555	17.7347	15.7987	2.73883	1.91209	0.956046	156.241
5	2	80	7	4	2	2	17	3	2	132.324	17.3635	33.2742	4.28815	70.4381	5.76205	2.43698	1.21849	267.105
5	2	79	6	4	2	2	16	3	2	145.771	9.91195	42.6706	2.78847	32.126	1.75041	1.68714	1.05446	237.76
5	2	78	6	4	2	1	13	2	2	162.88	31.0715	47.6828	11.114	73.4961	5.42461	2.48572	1.24286	335.398
5	2	79	6	4	2	2	17	3	2	177.349	12.513	29.1735	49.6886	77.6553	22.1932	2.43698	1.68714	372.697
5	2	79	6	4	2	1	12	2	2	276.322	12.138	5.97529	133.214	25.0728	1.51421	2.62444	2.62444	459.485
5	2	79	6	4	2	1	16	3	2	397.837	29.7359	36.9062	12.2318	44.0531	8.78016	5.24888	2.62444	537.417
5	2	62	5	4	2	1	22	4	2	263.069	26.2196	25.6937	11.6877	73.6395	16.3207	4.2066	7.02694	427.864
5	2	83	7	4	2	2	24	4	2	15.3495	19.6833	3.16339	100.713	2.8119	2.54571	2.62444	2.62444	149.516
5	2	70	6	4	2	1	15	3	2	257.928	25.8372	7.76788	9.75167	30.5935	7.78532	4.39781	4.39781	348.459
5	2	72	6	4	2	2	10	2	2	68.4464	10.404	27.5566	9.18554	22.4952	3.7656	1.68714	1.68714	145.228
5	2	68	5	4	2	2	20	3	2	173.764	13.2159	3.39771	3.56174	38.898	4.24503	2.24952	2.24952	241.582
5	2	61	5	4	2	2	6	1	2	86.0287	8.81062	35.4768	2.13236	29.7827	5.95139	1.49968	0.74984	170.432
5	2	66	5	4	2	1	9	2	2	25.4631	4.49342	4.66073	1.21896	42.329	2.78066	0.764837	0.382419	82.0931
5	2	49	3	4	2	1	15	3	2	78.0516	6.1904	27.1278	108.846	47.5872	9.65177	1.33846	1.33846	280.132
5	2	78	6	4	2	1	15	3	2	52.2673	7.17035	0	3.77638	0	47.9094	2.86814	1.43407	115.426
5	2	54	4	4	2	2	3	1	2	54.576	2.60101	29.525	4.6162	13.9423	69.1997	0.56238	0.28119	175.304
5	2	73	6	4	2	1	38	6	2	63.9382	7.55277	23.0646	8.77173	41.0144	3.73097	1.72088	0.860442	150.654
5	2	65	5	4	2	2	24	4	2	132.526	19.8239	30.6029	15.8404	58.5578	8.69299	3.56174	1.78087	271.386
5	2	65	5	4	2	2	10	2	2	210.21	18.6991	47.9429	180.43	51.8093	5.25169	2.62444	2.8119	519.78
5	2	65	5	4	2	1	14	2	2	39.4668	114.726	13.1934	3.94369	63.6249	6.8484	1.14726	1.14726	244.097
5	2	62	5	4	2	2	15	3	2	121.199	84.357	15.9341	8.13108	22.753	5.90921	2.24952	2.24952	262.782
5	2	76	6	4	2	1	9	2	2	40.3155	6.74013	7.38546	3.84809	42.6397	1.70176	1.14726	0.573628	104.352
5	2	61	5	4	2	2	11	2	2	68.6964	7.7093	40.4679	10.9195	46.0917	5.62966	1.49968	1.49968	182.514
5	2	74	6	4	2	1	14	2	2	93.6557	10.397	14.6992	5.18655	34.6567	9.49736	2.29451	2.74863	173.136
5	2	73	6	4	2	2	4	1	2	68.816	4.64352	39.5996	5.18566	58.2208	5.3193	0.754277	1.24927	183.788
5	2	73	6	4	2	2	15	3	2	324.421	17.8087	4.56934	202.433	51.9499	7.91339	3.56174	3.56174	616.22
5	2	72	6	4	2	2	8	2	2	211.852	26.4319	86.6066	86.5597	59.1905	89.0623	4.6865	2.34325	566.733
5	2	66	5	4	2	1	9	2	2	85.2074	11.8072	39.9149	79.7343	49.5949	2.1033	2.29451	2.29451	272.951
5	2	66	5	4	2	1	13	2	2	231.773	18.8341	47.6828	60.8763	39.2935	25.6455	3.05935	1.52967	428.695
5	2	72	6	4	1	2	14	2	2	294.874	42.2488	50.4502	142.517	98.0416	106.084	6.74856	7.84989	748.814
5	2	65	5	4	2	2	13	2	2	122.288	8.03735	5.03799	6.46737	39.7415	6.20024	1.68714	0.84357	190.304
5	2	63	5	4	2	1	13	2	2	178.792	19.097	22.0608	11.7116	82.1483	13.0878	3.25056	3.25056	333.399
5	2	81	7	4	2	2	4	1	2	76.1615	13.2159	36.8593	11.1773	35.6408	4.4025	2.43698	1.21849	181.113
5	2	81	7	4	2	1	14	2	2	22.4099	3.51488	17.879	2.08549	22.9404	0.0782646	0.56238	0.28119	69.7516
5	2	67	5	4	2	1	11	2	2	94.2212	11.2335	15.5358	2.77253	58.1037	4.19465	1.91209	0.956046	188.93
5	2	81	7	4	2	1	24	4	2	36.1285	8.98684	21.033	1.9838	35.7322	3.37771	1.52967	0.764837	109.537
5	2	81	7	4	1	1	27	4	2	52.2898	4.58902	22.3715	4.35001	38.6004	3.86601	1.33846	0.669232	128.074
5	2	81	7	4	2	1	22	4	2	87.8458	8.00689	7.55277	11.7116	35.8517	5.97003	2.1033	1.05165	160.094
5	2	81	7	4	2	1	22	4	2	97.8274	8.98684	3.70468	4.0393	25.0962	3.725	1.72088	0.860442	145.961
5	2	61	5	4	2	2	4	1	2	1.85	4.47561	11.81	1.0076	10.8727	0.235965	0.74984	0.37492	31.3766
5	2	60	5	4	2	1	9	2	2	114.281	16.8503	11.3531	14.8187	23.6621	6.48176	2.86814	2.86814	193.184
4	2	60	5	4	2	1	17	3	2	77.4694	11.2335	12.094	12.2135	29.996	6.06827	1.91209	1.91209	152.899
3	2	70	6	4	2	2	20	3	2	62.801	9.27927	26.1507	13.005	23.784	4.7657	1.8746	0.9373	142.598
3	2	78	6	4	2	1	13	2	2	248.344	17.9737	0.358517	24.3075	25.0245	6.90242	3.25056	1.62528	327.786
3	2	62	5	4	2	1	17	3	2	49.0734	7.86348	7.28985	6.28601	23.3275	2.36645	1.52967	0.764837	98.5012
3	2	80	7	4	2	1	4	1	2	71.7427	7.86348	14.9382	4.42171	44.5996	3.50056	1.52967	0.764837	149.361
3	2	54	4	4	2	2	13	2	2	55.4594	7.7093	10.4275	9.16211	25.2134	4.77039	1.49968	0.74984	114.992
3	2	75	6	4	2	1	17	3	2	96.0236	5.35386	32.1471	1.31456	32.5056	1.04783	1.33846	0.669232	170.4
3	2	72	6	4	2	2	8	2	2	56.4536	4.6865	0.351488	15.4186	18.4648	3.01084	0.74984	0.84357	99.9793
3	2	72	6	4	2	2	16	3	2	103.782	35.3362	6.91259	181.555	1.05446	102.244	5.43634	2.71817	439.039
3	2	70	6	4	2	1	14	2	2	57.6018	6.38161	22.1086	5.44946	35.8278	2.4415	1.33846	1.24286	132.392
2	2	61	5	4	2	2	7	1	2	120.953	12.5833	21.3002	6.7017	123.419	2.52438	1.68714	1.68714	290.855
2	2	64	5	4	2	2	8	2	2	122.566	14.3173	30.017	2.62444	57.9486	3.77146	2.43698	2.43698	236.119
2	2	72	6	4	2	1	8	2	2	28.8977	7.86348	11.2335	11.7355	24.905	3.88155	1.52967	0.764837	90.8113
2	2	56	4	4	2	1	7	1	2	38.7521	6.74013	14.4841	9.01074	15.4162	2.18385	1.33846	0.669232	88.5949
2	2	71	6	4	2	2	8	2	2	123.559	20.9252	28.4705	4.19442	59.9872	5.38479	3.56174	1.78087	247.864
2	2	69	5	4	3	2	58	6	2	30.4599	34.3521	42.4128	29.0329	143.032	4.02571	4.12412	2.62444	290.064
2	2	57	4	4	2	1	12	2	2	41.0507	5.44946	38.8394	1.12335	52.0328	1.98475	0.764837	0.382419	141.628
2	2	64	5	4	2	2	10	2	2	61.1174	9.34957	29.6187	5.06142	69.2196	1.54022	1.31222	0.65611	177.875
2	2	73	6	4	1	1	4	1	2	69.6762	14.6036	69.0266	3.87199	69.3612	3.87438	2.48572	1.45797	234.358
2	2	72	6	4	2	1	20	3	2	197.639	14.6036	7.93519	42.2573	75.9101	8.31354	2.67693	1.33846	350.674
2	2	63	5	4	2	1	11	2	2	198.591	26.9605	54.1361	16.5874	83.0804	1.87552	4.58902	4.58902	390.409
2	2	63	5	4	2	1	8	2	2	200.793	11.2335	37.8355	8.48491	94.8876	3.03784	1.91209	2.1033	360.288
2	2	64	5	4	2	2	9	2	2	320.741	42.0379	18.7694	25.6352	129.043	5.43751	6.74856	3.37428	551.787
2	2	80	7	4	2	1	8	2	2	40.0272	8.81062	16.7777	5.13172	50.7314	2.34278	1.49968	0.74984	126.071
2	2	79	6	4	2	1	17	3	2	54.9889	12.3569	17.0893	6.0948	42.1138	1.25266	2.1033	1.05165	137.051
2	2	79	6	4	2	2	8	2	2	85.6735	4.56934	0	36.0392	1.52311	0.946439	1.12476	1.12476	131.001
2	2	80	7	4	2	1	9	2	2	112.798	15.4186	27.416	7.05319	51.8093	5.71472	2.62444	1.31222	224.147
2	2	56	4	4	2	1	13	2	2	276.499	29.9721	27.8449	47.3721	97.2777	29.9749	4.01539	4.01539	516.971
2	2	56	4	4	2	1	9	2	2	123.661	8.41321	29.8764	9.36925	25.3352	6.40742	2.29451	1.14726	206.505
2	2	57	4	4	2	2	11	2	2	151.146	10.9664	39.3432	13.3331	47.8023	1.58099	1.49968	1.03103	266.703
2	2	52	4	4	2	2	8	2	2	44.7573	5.50664	13.1456	2.64787	43.6782	2.96046	0.9373	0.46865	114.102
2	2	64	5	4	2	2	8	2	2	210.328	9.77136	26.1272	35.7346	19.7302	1.35815	1.31222	1.8043	306.166
2	2	78	6	4	2	2	11	2	2	70.402	9.91195	23.8074	9.25584	43.1393	4.48428	1.68714	1.68714	164.375
2	2	67	5	4	2	2	8	2	2	56.3967	7.7093	25.4243	8.36541	41.1241	4.65838	1.31222	0.65611	145.646
2	2	67	5	4	2	2	10	2	2	84.6549	9.9706	14.4963	5.60994	46.3409	7.74643	1.69712	0.848562	171.365
2	2	68	5	4	2	2	13	2	2	93.6197	19.8239	21.3236	24.1589	30.4623	11.0175	3.37428	1.68714	205.467
2	2	67	5	4	2	2	15	3	2	105.75	11.0133	19.7067	13.005	33.5554	6.79871	2.06206	0.9373	192.829
2	2	69	5	4	2	1	13	2	2	141.198	12.094	26.602	16.8264	39.4369	6.89405	2.67693	1.33846	247.067
2	2	51	4	4	2	2	2	1	2	25.9267	11.4351	23.3388	2.31982	53.801	2.79128	1.8746	0.9373	122.425
2	2	74	6	4	2	1	28	4	2	22.0906	3.37006	42.2573	1.38627	70.1738	1.25983	0.573628	0.286814	141.398
2	2	59	4	4	2	1	10	2	2	58.4814	8.98684	20.9613	7.95909	24.1402	6.19661	1.52967	0.764837	129.02
2	2	78	6	4	2	1	17	3	2	80.968	10.1102	21.6545	17.3283	35.0152	5.75516	1.72088	1.91209	174.464
2	2	78	6	4	2	1	6	1	2	108.216	14.6753	16.9937	15.1055	33.9157	11.2677	2.48572	1.24286	203.902
2	2	79	6	4	1	1	4	1	2	50.9343	5.90359	1.19506	5.95139	27.3429	2.40111	0.956046	0.478023	95.1625
2	2	76	6	4	2	1	9	2	2	82.7986	8.36541	24.3792	11.4248	33.7006	6.29079	1.52967	0.764837	169.254
2	2	77	6	4	2	1	11	2	2	83.1043	11.2335	69.8153	2.89204	58.6773	5.10481	1.91209	0.956046	233.696
2	2	56	4	4	2	1	15	3	2	97.5151	13.4803	55.14	37.8833	61.3304	13.6272	2.29451	1.14726	282.418
2	2	78	6	4	2	1	12	2	2	133.909	16.8503	55.2595	10.7555	73.52	8.39026	2.86814	1.43407	302.987
2	2	77	6	4	2	1	9	2	2	134.329	11.9506	30.3545	40.0583	45.3883	8.82168	2.1033	1.05165	274.058
2	2	76	6	4	2	2	12	2	2	147.896	16.5199	16.9886	27.3926	9.04495	8.54185	2.99936	1.49968	230.883
2	2	77	6	4	2	2	9	2	2	171.548	9.91195	21.2064	2.27295	55.6756	3.41177	1.68714	0.84357	266.557
2	2	75	6	4	2	1	10	2	2	315.143	32.5773	44.1215	20.4116	82.3634	4.3536	5.54507	5.54507	510.06
2	2	61	5	4	2	2	14	2	2	70.8369	6.60797	9.04495	9.32614	21.3236	2.54618	1.12476	0.56238	121.373
2	2	62	5	4	2	1	8	2	2	75.1173	8.98684	21.6784	11.8789	36.9751	5.86128	1.72088	0.860442	163.079
2	2	56	4	4	2	2	4	1	2	99.8965	14.4579	27.2286	6.25648	57.5502	6.02965	2.24952	1.12476	214.794
2	2	65	5	4	2	2	10	2	2	108.959	13.4971	22.2843	15.0671	40.3273	6.76543	3.37428	1.68714	211.962
2	2	64	5	4	2	1	12	2	2	42.3641	7.86348	44.504	6.90744	41.4685	4.98172	1.33846	0.669232	150.097
2	2	77	6	4	2	2	14	2	2	46.9548	7.7093	27.2989	5.43634	38.6636	2.79081	1.31222	0.65611	130.822
2	2	65	5	4	2	1	11	2	2	62.0235	11.0133	26.385	5.95186	55.6756	4.08429	2.06206	1.03103	168.227
2	2	78	6	4	2	1	14	2	2	72.3003	11.2335	5.76018	4.97144	35.7561	2.83898	2.1033	1.05165	136.016
2	2	77	6	4	2	2	9	2	2	80.3327	15.4186	25.3305	17.3869	40.1868	6.8362	2.62444	1.31222	189.428
2	2	57	4	4	2	2	8	2	2	93.4938	8.81062	7.73273	8.45914	40.3039	4.16771	1.68714	0.84357	165.499
2	2	62	5	4	2	1	13	2	2	97.9185	9.39316	24.3553	5.97529	37.4053	3.54406	1.91209	0.956046	181.46
2	2	59	4	4	2	1	14	2	2	140.878	12.3569	22.2281	7.07474	28.7053	5.59502	2.29451	1.21896	220.351
2	2	57	4	4	2	2	8	2	2	180.673	20.9252	29.4078	26.4787	32.8524	10.285	3.7492	1.8746	306.246
2	2	77	6	4	2	2	6	1	2	316.915	13.3565	42.2957	4.7568	63.9942	5.36276	2.8119	1.40595	450.899
2	2	58	4	4	2	2	26	4	2	48.0821	10.0525	17.4807	2.08549	48.4116	3.06825	1.68714	0.84357	131.711
2	2	58	4	4	2	2	10	2	2	111.17	14.3876	17.8087	10.24	38.8277	5.73112	2.43698	1.21849	201.821
2	2	58	4	4	2	1	9	2	2	158.188	9.91195	22.4952	10.4743	43.9594	3.77123	1.8746	0.9373	251.612
2	2	77	6	4	2	2	9	2	2	159.058	15.1374	25.6586	10.9195	67.2747	6.06574	2.62444	1.31222	288.05
2	2	75	6	4	2	1	8	2	2	143.07	12.7473	26.2444	10.1228	90.4729	10.5824	3.18682	3.32742	299.755
2	2	74	6	4	2	2	11	2	2	45.21	6.60797	24.7213	8.67003	42.9049	2.9853	1.31222	0.65611	133.068
2	2	74	6	4	2	1	23	4	2	77.1986	9.98225	60.8308	26.4319	33.4148	5.11133	1.68714	0.84357	215.5
2	2	83	7	4	1	1	5	1	2	61.6621	11.2335	24.7855	13.6476	32.7924	5.87443	2.1033	1.05165	153.151
2	2	53	4	4	2	1	7	1	2	87.7048	8.98684	27.1517	12.094	38.0028	4.74151	1.72088	0.860442	181.263
2	2	47	3	4	2	2	14	2	2	102.853	11.7163	26.0101	3.93666	44.2874	8.71502	1.8746	0.9373	200.331
2	2	49	3	4	2	1	10	2	2	145.789	15.7987	17.2327	5.21045	44.8386	8.12926	2.86814	1.64918	241.516
2	2	52	4	4	2	2	10	2	2	98.3762	11.7163	10.3103	14.6219	36.8125	3.7813	2.06206	1.03103	178.712
2	2	67	5	4	2	2	5	1	2	33.5579	4.6865	11.2476	10.5681	50.4971	2.97546	0.9373	0.9373	115.407
2	2	56	4	4	2	1	5	1	2	216.922	28.0839	20.316	32.4817	64.0551	13.5883	4.97144	2.48572	382.904
2	2	50	4	4	2	2	10	2	2	32.9363	6.67827	2.46041	4.66307	36.3673	4.80788	1.12476	0.56238	89.6003
2	2	50	4	4	2	2	5	1	2	65.3849	7.7093	22.2843	6.11589	24.1355	3.0399	1.49968	0.74984	130.919
2	2	54	4	4	2	2	7	1	2	50.8914	6.60797	20.2691	1.47625	37.7498	2.24155	1.31222	0.65611	121.204
2	2	55	4	4	2	2	9	2	2	62.51	4.40531	24.9322	8.52943	24.6041	3.26345	0.9373	0.46865	129.65
2	2	54	4	4	2	2	11	2	2	84.1229	15.4186	23.8309	18.8397	30.6966	7.77631	2.8119	2.15579	185.653
2	2	81	7	4	2	2	20	3	2	96.0623	13.2159	25.4477	17.5509	25.0025	5.73651	2.24952	1.12476	186.39
2	2	83	7	4	2	2	11	2	2	125.352	12.1849	14.1767	22.3406	38.0778	6.25812	2.24952	1.12476	221.764
2	2	81	7	4	2	1	14	2	2	174.663	16.8503	101.006	8.48491	49.3798	7.52122	2.86814	1.43407	362.207
2	2	78	6	4	2	2	7	1	2	98.8261	12.1615	38.5465	17.6447	38.2184	8.73869	2.24952	2.24952	218.635
2	2	78	6	4	2	2	10	2	2	115.823	9.79479	50.0284	114.819	55.207	16.5701	2.06206	3.09309	367.397
2	2	65	5	4	2	2	8	2	2	48.5704	10.6852	26.6193	9.34957	35.8752	5.93358	1.49968	0.74984	139.283
2	2	49	3	4	2	2	8	2	2	70.1626	8.81062	21.9328	8.67003	40.2102	5.56756	1.68714	0.84357	157.885
2	2	50	4	4	2	1	12	2	2	88.6594	10.1102	17.3283	12.2852	33.5094	3.37269	1.91209	0.956046	168.133
2	2	49	3	4	2	2	8	2	2	55.9086	7.7093	26.9708	15.2311	17.9493	2.25585	1.49968	0.74984	128.274
2	2	60	5	4	2	2	6	1	2	44.0782	9.91195	28.4236	3.60861	71.8909	1.11164	1.68714	1.8746	162.587
2	2	60	5	4	2	2	11	2	2	244.791	16.0278	0.702975	211.994	4.92083	2.02668	3.37428	3.37428	487.211
2	2	80	7	4	2	2	10	2	2	52.0025	11.0784	34.3196	12.2334	35.4982	7.60005	1.88569	1.88569	156.504
2	2	79	6	4	2	1	26	4	2	72.5137	13.1456	2.27061	10.2297	39.2218	7.80182	2.1033	1.05165	148.338
2	2	79	6	4	2	1	6	1	2	278.219	16.0278	0	241.402	23.1982	2.49111	3.37428	3.37428	568.086
2	2	61	5	4	2	1	8	2	2	85.8811	12.7473	20.8549	17.6212	32.7586	8.94255	2.06206	2.27295	183.141
2	2	73	6	4	2	1	5	1	2	354.89	22.5388	35.6127	284.997	33.7484	34.7002	4.39781	6.59672	777.482
2	2	73	6	4	2	2	10	2	2	403.647	29.525	40.4211	228.326	64.0879	10.6833	3.93666	3.93666	784.564
2	2	73	6	4	2	1	9	2	2	12.6724	6.74013	37.6443	2.17501	71.2494	2.30192	1.14726	0.573628	134.504
2	2	68	5	4	2	2	7	1	2	70.5356	13.2159	38.195	6.02216	43.1393	4.47256	2.24952	2.24952	180.08
2	2	66	5	4	2	2	9	2	2	95.4251	12.1146	13.708	14.6688	20.9252	6.06176	2.06206	2.06206	167.028
2	2	66	5	4	2	2	12	2	2	156.77	11.9974	12.2083	9.13868	67.7434	8.33213	2.99936	2.99936	272.189
2	2	63	5	4	2	2	8	2	2	51.4709	13.2628	31.9854	12.0209	26.7599	8.07836	2.43698	2.85877	148.874
2	2	62	5	4	2	2	7	1	2	124.34	15.4186	28.4002	3.93666	62.4476	5.46048	2.62444	2.62444	245.252
2	2	64	5	4	2	2	9	2	2	200.985	98.4165	0	9.04495	85.0366	7.99541	2.24952	2.24952	405.977
2	2	73	6	4	2	1	10	2	2	1.10925	38.1463	2.86814	14.4602	4.2066	6.16076	5.35386	5.35386	77.6589
2	2	73	6	4	2	1	24	4	2	122.595	8.1742	36.4493	76.2208	53.8015	4.60289	1.91209	1.91209	305.667
2	2	68	5	4	3	1	9	2	2	101.168	15.4186	19.2147	15.4186	59.6592	6.94141	2.62444	1.31222	221.758
2	2	76	6	4	2	2	8	2	2	124.962	16.5199	31.7745	23.5497	20.9721	7.34937	2.99936	2.71817	230.845
2	2	70	6	4	2	2	9	2	2	391.421	14.739	5.97529	182.633	24.2526	2.13822	3.18682	3.18682	627.533
2	2	75	6	4	2	2	6	1	2	222.8	16.4731	5.97529	130.285	28.7048	1.87155	3.56174	3.56174	413.233
2	2	75	6	4	2	2	17	3	2	224.09	14.739	33.6257	197.911	34.9144	1.54983	3.18682	3.18682	513.203
2	2	63	5	4	2	2	7	1	2	68.9421	23.5712	0	78.7041	7.49563	32.3444	3.77139	1.88569	216.714
2	2	65	5	4	2	1	11	2	2	9.62514	4.40531	15.278	0.820138	63.5724	0.782412	0.74984	0.37492	95.6082
2	2	75	6	4	2	1	6	1	2	154.36	16.8503	33.2465	20.7701	60.2548	8.96533	3.05935	1.52967	299.036
2	2	48	3	4	2	2	6	1	2	36.1814	7.7093	19.9176	10.404	35.055	4.09108	1.49968	0.74984	115.608
2	2	48	3	4	2	1	13	2	2	88.5055	10.1102	18.4039	4.1588	37.2619	4.27544	1.72088	0.860442	165.297
2	2	45	3	4	2	2	7	1	2	119.438	6.7017	5.6238	2.71817	24.6744	6.59953	2.43698	0.913868	169.107
2	2	47	3	4	2	1	10	2	2	133.424	20.2204	26.6498	12.9544	49.2603	9.27078	3.63298	1.81649	257.23
2	2	74	6	4	2	2	14	2	2	64.0211	9.91195	19.8239	3.16339	42.9049	5.14016	1.8746	0.9373	147.777
2	2	69	5	4	2	1	14	2	2	90.7384	15.727	39.0784	8.96293	48.3281	5.4552	2.67693	1.33846	212.305
2	2	63	5	4	2	1	3	1	2	103.847	10.1102	10.397	5.04314	49.7383	7.08239	1.72088	0.860442	188.8
2	2	73	6	4	2	1	10	2	2	36.9734	6.74013	21.511	3.87199	37.8833	5.87849	1.14726	0.669232	114.675
2	2	76	6	4	2	1	10	2	2	81.9547	82.0138	106.501	13.6846	131.972	10.2873	1.8746	1.8746	430.162
2	2	74	6	4	2	1	12	2	2	88.3267	6.88353	3.46567	11.6877	58.1993	5.4411	1.72088	2.39012	178.115
2	2	66	5	4	2	1	9	2	2	118.299	12.3808	80.9293	48.8301	69.1222	7.43183	2.67693	1.33846	341.008
2	2	64	5	4	2	1	9	2	2	16.8283	5.44946	52.3674	15.0099	39.413	3.05194	0.764837	0.382419	133.267
2	2	62	5	4	2	2	9	2	2	49.3646	1.33565	9.67763	23.9012	0	35.2619	0	0	119.541
2	2	70	6	4	2	2	15	3	2	84.918	11.0133	35.758	9.56046	16.0513	6.34318	1.8746	0.9373	166.456
2	2	73	6	4	2	2	20	3	2	29.4312	6.67827	7.17035	2.43698	17.7853	0.837009	1.12476	0.56238	66.0263
2	2	73	6	4	2	2	10	2	2	431.576	20.6206	12.0677	200.559	29.8764	6.16345	4.12412	4.12412	709.112
2	2	67	5	4	2	2	8	2	2	43.8863	17.6212	26.8302	2.99936	55.91	4.10256	2.99936	1.49968	155.849
2	2	65	5	4	2	2	8	2	2	225.266	20.9252	27.7675	22.8701	53.2152	8.45726	3.7492	3.7492	365.999
2	2	70	6	4	2	2	8	2	2	98.2874	8.81062	24.487	7.84989	25.682	3.7792	1.49968	0.74984	171.146
2	2	73	6	4	2	1	7	1	2	139.885	22.5388	58.1993	167.762	44.6952	9.92806	4.39781	4.39781	451.804
2	2	82	7	4	2	1	19	3	2	195.015	28.6345	35.3362	16.1919	61.2994	17.4985	4.87396	4.87396	363.723
2	2	63	5	4	2	1	7	1	2	32.9356	2.24671	0	0.382419	0	0	0.382419	0.191209	36.1383
2	2	72	6	4	2	2	24	4	2	72.764	18.746	0	81.592	0	49.4834	2.99936	4.12412	229.709
2	2	70	6	4	2	2	10	2	2	368.162	28.7568	97.5846	95.6282	85.964	87.7262	5.46851	4.83209	774.123
2	2	65	5	4	2	2	10	2	2	68.582	8.81062	30.4623	7.61557	35.2894	3.57791	1.68714	0.84357	156.868
2	2	70	6	4	2	2	17	3	2	248.693	15.4186	32.9227	38.1247	28.7517	6.2143	2.8119	1.40595	374.343
2	2	70	6	4	2	2	9	2	2	64.2768	8.20138	15.3483	31.3293	31.259	11.1227	1.31222	1.96833	164.818
2	2	70	6	4	2	1	9	2	2	68.3078	7.09864	35.0391	3.25056	46.5117	3.14969	1.33846	0.669232	165.365
2	2	59	4	4	2	2	14	2	2	69.9411	9.91195	32.1025	8.83406	28.822	6.93907	1.68714	1.68714	159.925
2	2	65	5	4	2	1	7	1	2	88.3693	11.2335	36.3537	15.4162	46.1531	6.09551	2.1033	1.05165	206.776
2	2	63	5	4	2	1	13	2	2	0	0.812639	1.88819	2.1511	0	0	0.382419	0.191209	5.42556
2	2	74	6	4	2	2	14	2	2	13.5213	2.20266	11.5991	1.85117	32.7586	1.22927	0.37492	0.56238	64.0994
2	2	73	6	4	2	2	4	1	2	12.318	13.9189	0	35.594	11.6694	2.19375	4.87396	4.12412	84.6921
2	2	59	4	4	2	2	9	2	2	5.89445	2.27295	8.27168	0.09373	10.8727	0.284471	0.56238	0.18746	28.4398
2	2	68	5	4	2	2	6	1	2	98.2194	13.2941	26.9183	17.9848	30.1711	5.83551	2.4514	1.2257	196.1
2	2	68	5	4	2	2	8	2	2	100.775	9.30271	26.8302	18.043	30.0873	10.5453	2.06206	2.71817	200.364
2	2	80	7	4	2	2	20	3	2	89.3662	13.2159	16.309	10.0994	33.6022	5.10173	2.24952	2.24952	172.194
2	2	80	7	4	2	2	8	2	2	155.018	16.6177	7.07135	4.66709	49.9944	5.976	2.82854	2.82854	245.001
1	2	64	5	4	2	2	9	2	2	5.40072	2.06206	0	1.17163	26.5959	0.356174	0.74984	0.74984	37.0862
1	2	67	5	4	2	2	7	1	2	43.4544	7.7093	16.0513	5.5535	26.3616	3.35366	1.49968	0.74984	104.733
1	2	58	4	4	2	1	12	2	2	115.371	13.4803	12.9066	10.4687	89.9162	6.33046	2.48572	1.24286	252.202
1	2	87	7	4	2	2	6	1	2	211.251	19.8239	8.95122	7.17035	61.7681	5.60881	3.37428	1.68714	319.635
1	2	50	4	4	2	2	14	2	2	67.4746	12.513	26.3616	16.9651	23.3153	6.73263	2.24952	1.12476	156.737
1	2	59	4	4	2	2	8	2	2	191.896	15.4186	39.1323	4.79898	59.4483	7.48481	2.62444	2.62444	323.427
1	2	85	7	4	2	1	10	2	2	86.8853	14.3407	21.033	18.8819	30.8803	6.60246	2.48572	2.48572	183.595
1	2	66	5	4	2	1	5	1	2	78.5784	10.1102	44.9581	7.02694	51.4114	3.51921	1.91209	0.956046	198.472
1	2	50	4	4	2	2	15	3	2	88.9915	12.138	10.4275	9.41987	47.8258	8.87553	2.62444	1.31222	181.615
1	2	67	5	4	2	2	3	1	2	156.352	16.5199	63.6193	19.8239	30.9543	7.52558	2.99936	1.49968	299.294
1	2	58	4	4	2	2	7	1	2	29.641	14.6922	62.0024	2.10893	51.6921	6.65179	2.06206	2.06206	170.913
6	1	65	5	4	2	1	14	2	2	92.3997	10.1102	8.72392	3.15495	57.2672	4.32898	1.72088	0.860442	178.566
6	1	59	4	4	2	2	24	4	2	33.4642	7.75491	15.0855	7.47206	23.8069	2.58293	1.50855	0.754277	92.4294
5	1	57	4	4	2	1	13	2	2	305.257	32.5295	11.2335	122.493	61.8084	51.4102	5.35386	6.07089	596.157
5	1	75	6	4	2	2	11	2	2	0.405382	3.30398	5.83469	0.632678	1.40595	0.0426472	0.56238	0.28119	12.4689
5	1	73	6	4	2	1	18	3	2	62.3349	13.4803	23.0646	13.7671	50.9334	5.93561	2.29451	1.14726	172.958
5	1	72	6	4	2	1	11	2	2	70.0278	9.75167	23.8056	7.45716	27.7253	3.58709	1.72088	0.860442	144.936
5	1	73	6	4	2	2	10	2	2	82.8227	14.0595	12.9113	30.1576	73.0157	7.8274	2.24952	1.75744	224.801
5	1	73	6	4	2	1	13	2	2	135.418	6.81183	42.7831	15.727	42.4485	3.76754	1.33846	1.05165	249.346
5	1	72	6	4	2	1	10	2	2	150.17	10.1102	37.8833	26.8888	25.8372	3.91549	1.91209	0.956046	257.673
5	1	80	7	4	2	2	26	4	2	63.47	9.30271	29.1969	4.00696	32.4775	6.1515	1.49968	0.890435	146.996
5	1	80	7	4	2	1	9	2	2	108.093	11.2335	35.3976	52.5108	62.0235	7.69665	1.91209	0.956046	279.824
5	1	80	7	4	2	1	9	2	2	173.608	15.2967	35.1586	46.4161	94.1228	11.899	4.01539	2.0077	382.524
5	1	80	7	4	2	1	22	4	2	365.807	26.9605	38.7916	31.2866	36.2342	9.5313	4.78023	2.39012	515.782
5	1	80	7	4	2	2	17	3	2	56.0695	12.1146	31.5167	7.7093	32.5712	3.68265	2.06206	1.03103	146.757
5	1	70	6	4	4	1	8	2	2	35.1211	12.9305	2.86814	11.7594	21.0569	1.2474	2.29451	2.29451	89.5725
5	1	71	6	4	2	2	11	2	2	111.32	16.0513	14.0595	11.4819	32.126	9.46345	2.62444	2.62444	199.751
5	1	63	5	4	2	1	7	1	2	152.871	75.2887	60.3504	8.48491	71.4884	13.0338	1.72088	1.72088	384.959
5	1	86	7	4	2	2	15	3	2	67.394	8.81062	21.7922	7.47497	24.5807	4.10256	1.49968	0.84357	136.498
5	1	86	7	4	2	2	17	3	2	209.448	23.1279	40.2102	14.0829	92.1366	11.3425	3.93666	3.93666	398.222
5	1	59	4	4	2	2	17	3	2	52.6611	7.7093	16.5434	7.02975	20.5034	2.73504	1.49968	0.74984	109.431
5	1	59	4	4	2	2	9	2	2	75.8899	13.2159	6.09245	21.4642	41.0069	8.13999	2.24952	1.12476	169.184
5	1	59	4	4	2	2	16	3	2	128.07	13.3565	29.6656	4.7568	37.492	3.92963	1.8746	1.8746	221.02
5	1	67	5	4	2	2	14	2	2	63.7788	9.91195	39.5072	10.2166	33.0867	4.43484	1.68714	0.84357	163.467
5	1	67	5	4	2	2	14	2	2	82.7367	9.91195	11.2476	13.5674	30.6029	5.41502	1.68714	1.71057	156.879
5	1	68	5	4	2	1	13	2	2	92.1003	10.6121	32.888	10.9706	35.2781	7.65841	1.72088	0.860442	192.089
5	1	80	7	4	2	2	12	2	2	67.4613	7.92019	40.0696	2.78847	69.1259	2.72098	1.31222	0.65611	192.055
5	1	80	7	4	2	2	7	1	2	81.9088	11.0133	23.9246	11.4351	25.3071	7.04311	1.8746	1.8746	164.381
5	1	78	6	4	2	2	8	2	2	96.1719	182.774	37.7498	9.06838	86.4894	5.00167	2.24952	1.12476	420.629
5	1	79	6	4	2	2	17	3	2	322.412	26.7131	46.5604	127.285	63.5255	13.9878	3.7492	1.8746	606.108
5	1	42	3	4	2	1	25	4	2	164.7	17.9737	50.3119	24.9289	30.713	7.76955	3.25056	1.62528	301.272
5	1	36	2	4	2	1	9	2	2	77.9587	13.552	19.9575	5.64067	31.5973	4.61818	2.29451	2.29451	157.913
5	1	54	4	4	2	1	10	2	2	543.709	32.5773	56.1438	30.2589	104.472	9.4988	5.54507	5.16265	787.368
5	1	70	6	4	2	2	11	2	2	252.035	25.3305	99.8225	100.174	77.8194	27.9198	4.31158	2.15579	589.569
5	1	64	5	4	2	2	12	2	2	68.9002	12.1146	18.746	5.6941	72.7111	0.954406	2.06206	1.03103	182.214
5	1	67	5	4	2	2	9	2	2	67.8481	8.88092	26.1507	10.5446	52.6294	4.03859	1.49968	1.49968	173.092
5	1	67	5	4	2	2	7	1	2	74.6511	17.6212	27.416	13.5909	40.4445	7.42998	2.99936	1.49968	185.653
5	1	78	6	4	2	2	11	2	2	94.7027	12.1146	20.0582	10.5915	42.4597	3.59127	2.06206	1.03103	186.611
5	1	78	6	4	2	2	13	2	2	138.436	14.5282	1.40595	29.3375	25.1665	11.4313	2.43698	1.21849	223.961
5	1	67	5	4	2	1	17	3	2	66.232	10.1102	7.64837	4.1349	30.8564	5.71764	1.91209	0.956046	127.568
5	1	79	6	4	2	2	26	4	2	41.6093	7.7093	17.8087	10.9898	21.4407	4.59441	1.49968	0.74984	106.402
5	1	78	6	4	2	1	19	3	2	60.9676	11.2335	0	14.2451	10.4687	4.26349	2.1033	1.05165	104.333
5	1	78	6	4	2	1	23	4	2	88.5172	12.9305	32.888	4.0393	50.0968	7.44856	2.1033	1.05165	199.075
5	1	79	6	4	2	2	14	2	2	109.078	14.0595	31.7511	19.4958	50.4736	6.79965	2.43698	2.43698	236.532
5	1	77	6	4	2	2	17	3	2	114.705	8.88092	16.0513	12.2552	36.6016	6.13065	2.24952	1.12476	197.999
5	1	79	6	4	2	2	15	3	2	130.124	13.2159	40.1868	6.02216	97.737	5.97623	2.24952	1.12476	296.637
5	1	79	6	4	2	2	17	3	2	140.09	15.4186	26.9708	4.10069	47.3337	14.7779	2.62444	1.31222	252.629
5	1	77	6	4	1	2	3	1	2	145.61	15.4186	24.0652	15.8638	44.3109	10.4026	2.8119	1.40595	259.889
5	1	75	6	4	2	1	10	2	2	154.306	17.9737	39.9149	15.0577	28.1795	10.7304	3.25056	1.62528	271.038
5	1	75	6	4	2	2	8	2	2	213.719	9.34957	0	7.73273	25.4477	3.06638	1.49968	0.74984	261.565
5	1	80	7	4	2	2	19	3	2	90.4403	8.13108	13.8252	16.9417	36.5313	3.64071	1.49968	0.74984	171.76
5	1	80	7	4	2	2	18	3	2	127.298	18.7226	8.90435	21.9563	24.1355	8.23864	3.37428	1.68714	214.317
5	1	50	4	4	2	2	16	3	2	41.1376	4.47561	26.4787	4.87396	44.4046	2.63077	0.9373	0.46865	125.407
5	1	78	6	4	2	2	5	1	2	53.4328	5.27994	33.4711	4.24281	44.1252	3.22689	1.50855	0.754277	146.042
5	1	88	7	4	2	1	22	4	2	81.8218	5.35386	25.1201	9.46486	30.474	4.80031	1.52967	0.764837	159.329
5	1	60	5	4	2	2	15	3	2	95.454	11.0133	45.2247	9.98225	50.872	3.16386	2.06206	1.03103	218.803
5	1	77	6	4	2	1	8	2	2	118.913	9.17805	68.7158	3.46567	52.3674	5.10385	2.29451	1.14726	261.185
5	1	67	5	4	2	2	10	2	2	43.3375	5.60994	20.8841	4.92637	26.0697	2.71634	1.13142	0.565708	105.241
5	1	62	5	4	2	1	9	2	2	45.9268	4.49342	22.73	4.1349	27.2473	4.3371	0.956046	0.478023	110.304
5	1	80	7	4	2	1	10	2	2	51.5818	4.49342	24.0207	7.33766	73.1615	4.63085	0.956046	0.860442	167.042
5	1	63	5	4	2	1	4	1	2	60.6344	14.3407	82.3395	22.1086	77.7027	16.1213	1.14726	0.573628	274.968
5	1	80	7	4	2	1	7	1	2	73.629	13.4803	33.1031	15.6314	35.7322	5.52212	2.29451	1.14726	180.54
5	1	68	5	4	2	1	7	1	2	81.1884	8.98684	23.0646	7.31375	36.4493	3.62628	1.72088	0.860442	163.211
5	1	62	5	4	2	2	12	2	2	84.5288	12.8879	30.6497	17.7384	81.0999	8.25387	2.24952	1.12476	238.533
5	1	86	7	4	2	2	3	1	2	85.7806	15.1608	13.3565	32.2197	50.1221	10.2822	2.62444	2.62444	212.171
5	1	83	7	4	2	2	5	1	2	103.759	13.2159	20.5034	18.3008	38.5699	8.64004	2.24952	1.12476	206.364
5	1	53	4	4	2	2	7	1	2	109.902	14.3173	29.5718	4.07726	52.2311	3.65781	2.43698	1.21849	217.413
5	1	57	4	4	2	1	16	3	2	114.404	12.3569	8.48491	17.7825	62.1669	6.29533	2.29451	1.14726	224.932
5	1	80	7	4	2	1	6	1	2	117.659	11.2335	16.1333	16.5635	28.8009	7.08932	2.1033	1.05165	200.635
5	1	82	7	4	2	1	14	2	2	120.887	13.4803	57.6018	14.6036	42.7831	7.1082	2.29451	1.14726	259.906
5	1	57	4	4	2	1	9	2	2	124.718	26.2913	67.6881	3.03545	66.1345	6.04269	2.29451	1.14726	297.352
5	1	88	7	4	2	1	8	2	2	131.289	6.1187	42.3051	4.80413	32.2905	8.86351	1.52967	0.764837	227.965
5	1	79	6	4	2	2	8	2	2	142.399	17.3166	36.9062	18.6054	52.7466	11.1408	3.37428	1.68714	284.176
5	1	79	6	4	2	2	5	1	2	143.761	6.74856	5.97529	3.23369	36.5781	3.5833	1.68714	0.84357	202.411
5	1	59	4	4	2	1	2	1	2	154.317	17.8542	38.8394	25.0245	54.4468	7.72964	2.86814	1.43407	302.514
5	1	79	6	4	2	1	15	3	2	182.547	15.4186	27.2989	3.8195	63.9942	5.69316	2.62444	1.31222	302.708
5	1	57	4	4	2	2	10	2	2	182.669	24.2292	65.7751	53.0512	60.3621	16.1019	4.12412	2.06206	408.375
5	1	67	5	4	2	2	13	2	2	242.681	21.049	70.9963	56.3115	57.1601	14.2304	3.58282	1.79141	467.803
5	1	58	4	4	2	2	9	2	2	89.164	9.91195	14.2001	5.90499	43.5142	5.30231	1.68714	0.84357	170.528
5	1	77	6	4	2	2	11	2	2	44.2511	7.7093	10.0994	8.48257	21.6751	2.83276	1.31222	0.65611	97.0186
5	1	77	6	4	2	2	22	4	2	116.74	16.4028	41.7099	41.3818	39.4838	9.50633	2.62444	2.8119	270.66
5	1	77	6	4	2	2	5	1	2	202.607	12.1146	25.4711	27.8378	32.4775	11.8981	2.24952	1.12476	315.78
5	1	75	6	4	2	1	12	2	2	73.58	10.1102	15.1772	8.1981	41.8509	3.68819	1.91209	0.956046	155.473
5	1	74	6	4	2	1	14	2	2	124.102	9.94288	43.0699	6.66842	28.4424	5.74464	2.67693	1.33846	221.986
5	1	75	6	4	2	1	13	2	2	214.998	28.7531	20.9135	12.2374	66.1106	10.7472	4.78023	2.39012	360.93
5	1	83	7	4	2	1	19	3	2	115.303	15.727	24.2597	11.8789	33.3182	6.6015	2.67693	1.33846	211.104
5	1	85	7	4	2	2	9	2	2	126.129	16.5902	4.8271	4.19442	52.3951	7.89418	2.99936	1.49968	216.529
5	1	87	7	4	2	1	23	4	2	256.013	25.1201	67.1862	7.62447	102.942	8.58147	4.58902	2.29451	474.351
5	1	77	6	4	2	2	4	1	2	130.903	23.4325	30.3451	11.3179	36.5313	6.08378	1.8746	0.9373	241.425
5	1	83	7	4	2	2	18	3	2	320.51	32.3837	92.8513	128.012	188.983	46.4648	5.34261	17.1526	831.7
5	1	77	6	4	2	2	13	2	2	419.369	23.7137	39.1557	31.3996	106.524	34.7954	5.43634	7.02975	667.423
5	1	76	6	4	2	1	12	2	2	18.9517	4.49342	50.9095	1.91209	54.9966	2.22854	0.764837	0.382419	134.639
5	1	80	7	4	2	2	17	3	2	36.6838	6.64707	5.30351	2.73425	24.3726	1.51775	1.13142	0.659993	79.0504
5	1	78	6	4	2	2	14	2	2	118.671	13.2159	28.0253	5.57694	73.953	5.31215	2.24952	2.24952	249.253
5	1	56	4	4	2	1	5	1	2	129.747	6.6314	53.7776	13.8486	40.3039	2.32732	1.49968	0.74984	248.886
5	1	60	5	4	2	2	10	2	2	21.698	168.714	82.5996	10.943	42.8815	0.134503	1.49968	2.99936	331.47
5	1	60	5	4	2	2	16	3	2	97.6915	11.0133	22.6124	8.10765	53.4261	4.47491	1.8746	1.8746	201.075
5	1	61	5	4	2	1	10	2	2	69.8839	11.2335	32.7446	8.70002	52.0089	4.44227	2.1033	1.05165	182.168
5	1	61	5	4	2	1	9	2	2	300.775	87.5499	44.7191	3.53737	80.3318	12.3048	1.72088	2.58133	533.52
5	1	79	6	4	2	1	17	3	2	223.361	20.0348	34.3286	6.04559	56.0271	7.26876	2.8119	2.8119	352.689
5	1	51	4	4	2	2	20	3	2	12.1512	5.17858	13.5909	6.27991	40.796	0.747028	0.9373	0.46865	80.1495
5	1	51	4	4	2	2	15	3	2	69.9664	8.20138	38.0075	11.6225	50.0753	3.31476	1.49968	1.49968	184.187
5	1	59	4	4	2	2	18	3	2	222.162	16.0278	0.702975	216.962	43.4907	1.62294	3.37428	5.06142	509.404
5	1	61	5	4	2	2	11	2	2	237.401	24.0418	8.20138	314.769	26.6193	1.72815	5.06142	5.06142	622.883
5	1	73	6	4	2	1	13	2	2	62.2562	9.84165	0.702975	64.744	2.46041	6.1194	1.31222	1.31222	148.749
5	1	66	5	4	2	2	18	3	2	96.4208	21.7219	34.9379	8.13108	75.5933	7.47919	1.68714	1.54655	247.518
5	1	63	5	4	2	1	11	2	2	201.394	20.4355	33.8201	5.28216	52.8455	8.63884	2.86814	1.43407	326.719
5	1	64	5	4	2	1	8	2	2	221.124	11.9745	41.9465	108.487	44.241	19.0064	2.29451	3.44177	452.516
5	1	82	7	4	2	2	14	2	2	356.829	37.3983	24.3932	199.2	83.6775	8.54256	5.24888	5.06142	720.351
5	1	73	6	4	1	1	25	4	2	106.372	17.0654	9.32145	6.1904	17.9259	3.88872	2.29451	1.14726	164.206
5	1	78	6	4	2	1	6	1	2	108.569	12.1146	23.4325	4.70993	29.6421	4.55903	2.06206	1.78087	186.87
5	1	73	6	4	2	2	9	2	2	201.688	16.3325	22.0266	179.587	56.074	21.3348	3.18682	4.78023	505.009
5	1	88	7	4	2	2	20	3	2	116.381	13.2159	13.005	4.31158	60.3621	5.26482	2.24952	2.24952	217.04
5	1	80	7	4	2	1	19	3	2	152.535	15.727	44.5996	7.31375	44.9581	6.09575	2.67693	1.33846	275.244
5	1	80	7	4	2	1	23	4	2	169.289	13.4803	0.717035	4.61292	28.9204	3.12914	2.29451	1.14726	223.59
5	1	80	7	4	2	1	10	2	2	247.728	6.74013	2.50962	1.60138	27.9644	1.5856	1.14726	0.573628	289.85
5	1	64	5	4	2	2	13	2	2	56.7866	12.3255	11.4819	10.7087	32.1025	9.57851	2.06206	2.69474	137.741
5	1	82	7	4	2	1	23	4	2	1054.63	69.17	128.851	235.116	334.592	29.642	11.0901	9.27365	1872.36
5	1	79	6	4	2	2	12	2	2	85.136	11.0784	34.791	7.87277	34.1782	3.7596	1.88569	0.942847	179.645
5	1	67	5	4	2	1	16	3	2	184.606	28.6097	22.1086	29.1355	74.4521	5.76831	4.01539	2.0077	350.704
5	1	76	6	4	2	2	5	1	2	81.5008	8.90435	7.99049	177.923	36.6719	1.86523	1.8746	2.8119	319.542
5	1	66	5	4	2	1	9	2	2	74.1818	14.7709	57.8408	13.289	46.2726	6.12252	1.33846	0.669232	214.485
5	1	43	3	4	2	2	23	4	2	167.401	14.739	5.15515	186.64	24.2526	0.756636	3.18682	3.18682	405.318
5	1	75	6	4	2	1	11	2	2	110.271	14.1495	27.0083	186.286	43.6196	1.97208	3.05935	3.05935	389.425
5	1	56	4	4	2	1	10	2	2	93.4332	35.8517	28.4663	3.75248	58.9164	5.36246	2.86814	1.43407	230.085
5	1	46	3	4	2	1	22	4	2	56.7643	7.86348	18.5473	10.7077	40.4886	5.86056	1.33846	0.669232	142.24
5	1	62	5	4	2	1	12	2	2	64.7867	10.1102	16.3723	14.0539	31.0715	2.65255	1.72088	0.860442	141.628
5	1	74	6	4	2	2	25	4	2	56.949	9.91195	12.1849	8.15451	38.4527	3.42958	1.8746	0.9373	131.895
5	1	74	6	4	2	2	9	2	2	106.505	8.81062	18.5351	5.41291	58.7219	5.93499	1.49968	0.74984	206.17
5	1	75	6	4	2	1	16	3	2	118.381	7.64837	11.8311	20.1487	30.3784	0.121896	1.91209	0.956046	191.378
5	1	74	6	4	2	2	14	2	2	159.01	15.4186	38.4879	24.4167	61.44	8.18357	2.8119	1.40595	311.174
5	1	63	5	4	2	1	10	2	2	208.744	31.4539	20.6745	57.4584	43.4045	9.21653	5.35386	2.67693	378.983
5	1	85	7	4	2	2	23	4	2	0.0609245	6.60797	11.0133	0.304623	36.6953	0.520905	1.12476	0.56238	56.8902
5	1	62	5	4	2	2	11	2	2	30.0855	360.322	0	0.890435	0	0	3.93666	3.93666	399.171
5	1	75	6	4	2	1	7	1	2	94.5291	10.1102	67.5686	2.86814	45.4361	3.51538	1.91209	0.956046	226.896
5	1	88	7	4	2	2	21	3	2	37.5326	7.02975	25.2134	8.506	42.9049	4.73266	1.12476	0.56238	127.606
5	1	92	8	4	2	2	20	3	2	133.346	17.3635	40.5382	100.619	50.4033	16.7559	2.43698	3.65547	365.119
5	1	73	6	4	2	2	16	3	2	51.5461	11.0836	24.3698	3.70234	70.2038	1.07274	1.8746	1.8746	165.728
5	1	70	6	4	2	1	9	2	2	292.165	17.0654	31.3105	132.066	155.334	27.047	0	3.17885	658.166
5	1	63	5	4	2	2	9	2	2	193.923	16.1919	34.6801	8.31854	79.5299	7.68586	2.62444	2.06206	345.015
5	1	73	6	4	2	2	24	4	2	52.6184	7.02975	19.6833	8.01392	26.8537	5.05697	0.9373	1.40595	121.599
5	1	63	5	4	2	1	8	2	2	62.7234	11.0133	21.2064	11.107	44.1703	5.51789	2.06206	1.03103	158.831
5	1	72	6	4	2	2	17	3	2	83.2269	6.81886	17.5978	13.5674	29.1735	4.36618	1.8746	0.9373	157.563
5	1	73	6	4	2	1	15	3	2	174.2	33.1031	23.9012	18.7863	75.8623	2.55981	5.35386	5.35386	339.121
5	1	73	6	4	2	1	18	3	2	156.066	14.1973	33.4616	32.2427	97.0626	14.1251	2.48572	2.29451	351.935
5	1	72	6	4	2	2	10	2	2	367.829	26.3381	53.7776	52.5123	162.481	29.4882	5.06142	4.14755	701.635
5	1	82	7	4	2	1	12	2	2	69.414	8.2937	31.0715	4.89974	77.7983	7.21863	1.33846	1.33846	201.373
5	1	67	5	4	2	1	26	4	2	243.508	15.5358	41.6119	19.3121	24.3075	9.93476	2.67693	2.67693	359.564
5	1	73	6	4	2	2	9	2	2	316.271	23.3119	56.2172	91.8333	122.264	20.1418	4.9028	4.71423	639.656
5	1	81	7	4	2	2	17	3	2	78.0195	8.81062	36.789	2.55414	46.1855	4.09366	1.49968	0.74984	178.702
5	1	81	7	4	2	2	11	2	2	281.37	22.4952	56.1209	81.9201	71.8675	72.6389	2.99936	4.49904	593.911
5	1	75	6	4	2	1	11	2	2	48.352	10.8989	56.0482	33.1031	56.3111	4.14781	1.52967	1.52967	211.921
5	1	74	6	4	2	2	8	2	2	222.414	17.012	38.9683	6.72513	56.6129	2.56516	2.8119	1.40595	348.515
5	1	62	5	4	2	1	9	2	2	229.239	23.5904	18.2844	20.6028	23.3036	11.4635	4.2066	2.1033	332.794
5	1	68	5	4	2	2	8	2	2	195.515	24.3698	70.4147	43.3033	113.671	9.44564	4.12412	4.12412	464.968
4	1	70	6	4	2	2	5	1	2	73.2854	9.04495	24.5104	10.7555	27.416	5.63411	1.49968	0.74984	152.896
4	1	76	6	4	2	1	23	4	2	95.4309	11.2335	0	24.4031	63.601	5.1887	2.1033	1.05165	203.012
4	1	80	7	4	2	2	14	2	2	78.4324	6.06902	35.3831	8.27168	32.4775	5.59803	1.49968	0.74984	168.481
4	1	84	7	4	2	1	15	3	2	94.9842	14.9621	32.3861	3.48957	60.9719	6.51904	2.48572	2.84424	218.643
4	1	60	5	4	2	1	10	2	2	191.684	24.9289	32.2905	11.1857	83.7975	14.6409	4.2066	4.30221	367.037
4	1	74	6	4	2	2	22	4	2	93.9452	11.8327	22.7462	10.5835	35.121	5.01359	2.26283	1.13142	182.636
4	1	61	5	4	2	1	16	3	2	84.3627	6.81183	6.83573	7.72007	38.1702	3.63083	1.33846	0.669232	149.539
3	1	79	6	4	2	2	11	2	2	180.885	17.4338	35.7346	30.6263	33.7428	18.066	2.8119	4.92083	324.221
3	1	78	6	4	2	2	7	1	2	79.4817	11.0133	15.3717	9.34957	29.8764	4.70712	1.8746	1.8746	153.549
3	1	67	5	4	2	2	15	3	2	103.568	21.0893	6.91259	51.9499	33.9537	153.526	2.8119	2.8119	376.623
3	1	88	7	4	2	2	10	2	2	48.2232	11.0133	0	6.46737	45.9512	4.03109	2.06206	1.03103	118.779
2	1	60	5	4	2	1	19	3	2	66.6974	6.74013	37.6443	2.0077	55.4746	2.20082	1.14726	0.573628	172.486
2	1	64	5	4	2	2	7	1	2	106.898	12.1849	21.2064	28.7751	23.3153	3.06732	1.8746	0.9373	198.259
2	1	80	7	4	2	2	9	2	2	35.1185	3.30398	10.779	1.56998	29.0563	1.30519	0.56238	0.28119	81.9765
2	1	80	7	4	2	2	7	1	2	273.9	9.95882	51.5515	198.38	36.1329	1914.17	2.43698	1.54655	2488.08
2	1	66	5	4	2	1	5	1	2	24.9908	0.956046	8.2698	4.37391	74.5238	0.958198	0.764837	0.382419	115.22
2	1	66	5	4	2	2	6	1	2	57.9453	13.2159	15.3717	11.6225	28.7048	5.89046	2.24952	1.12476	136.125
2	1	71	6	4	2	2	8	2	2	87.8745	11.0133	42.4831	9.20898	54.9492	7.98346	2.06206	1.03103	216.606
2	1	72	6	4	2	1	5	1	2	159.513	21.3437	15.8943	17.1371	26.2913	8.6147	3.82419	1.91209	254.53
2	1	64	5	4	2	1	4	1	2	214.456	13.4803	95.6046	8.96293	70.4128	6.30369	2.48572	1.24286	412.949
2	1	59	4	4	2	2	10	2	2	57.2348	8.81062	18.3008	19.8473	47.7555	5.74893	1.49968	0.74984	159.948
2	1	59	4	4	2	2	7	1	2	91.3828	9.9706	22.6519	4.66709	58.3622	5.91707	1.69712	1.90926	196.558
2	1	59	4	4	2	2	10	2	2	151.941	12.1146	7.02975	30.7435	65.8688	6.44253	2.24952	1.12476	277.515
2	1	64	5	4	2	2	8	2	2	12.6381	4.40531	23.9012	3.32742	84.6851	1.09008	0.74984	0.37492	131.172
2	1	68	5	4	2	1	8	2	2	69.7995	8.98684	15.6792	11.377	30.474	5.5171	1.52967	1.52967	144.893
2	1	79	6	4	2	2	8	2	2	4.84491	3.44458	6.44394	2.06206	39.8353	2.61741	0.56238	0.56238	60.3729
2	1	79	6	4	2	1	9	2	2	58.9534	25.0962	179.044	6.62062	93.836	4.27783	0.573628	0.286814	368.688
2	1	79	6	4	2	2	10	2	2	100.967	10.5835	27.4604	7.02421	62.9586	10.4684	1.88569	1.2257	222.573
2	1	80	7	4	2	1	14	2	2	105.531	12.3569	17.3283	19.7902	18.4039	7.87185	2.1033	2.1033	185.488
2	1	62	5	4	2	2	11	2	2	224.27	28.119	19.449	107.297	104.017	30.3496	3.56174	3.56174	520.625
2	1	71	6	4	3	1	8	2	2	33.2955	5.61677	32.0515	5.44946	60.7328	2.57726	1.14726	0.573628	141.444
2	1	59	4	4	2	1	7	1	2	0	1.10133	1.17163	0.257758	49.466	0.215579	0.18746	0.09373	52.4935
2	1	56	4	4	2	1	7	1	2	84.4908	16.1333	28.8009	7.45716	26.3869	4.95614	2.86814	1.43407	172.527
2	1	58	4	4	2	2	7	1	2	78.9052	11.0133	24.2761	4.17099	57.6674	6.21758	1.8746	0.9373	185.062
2	1	79	6	4	2	1	8	2	2	61.6767	0	11.9745	0	40.0344	0.681183	0	0	114.367
2	1	76	6	4	2	1	10	2	2	68.5132	15.1055	12.4286	13.8866	27.1756	5.81922	2.67693	1.33846	146.944
2	1	79	6	4	2	2	5	1	2	95.1308	13.2159	19.3318	7.07662	53.6604	4.2291	2.24952	1.12476	196.019
2	1	76	6	4	1	1	6	1	2	115.204	14.6036	84.3711	25.2874	50.9334	6.91676	2.67693	1.33846	301.332
2	1	77	6	4	2	1	14	2	2	160.124	8.98684	19.4794	6.02309	46.9897	3.76348	1.72088	1.00385	248.091
2	1	51	4	4	2	1	2	1	2	133.644	22.4671	40.7754	12.094	26.602	7.29368	3.82419	1.91209	248.612
2	1	64	5	4	2	1	10	2	2	176.143	15.727	32.5056	14.3646	63.5771	6.29939	2.86814	1.43407	312.919
2	1	54	4	4	2	2	13	2	2	49.8447	6.60797	22.6124	2.34325	57.644	2.03769	1.12476	0.56238	142.777
2	1	74	6	4	2	2	11	2	2	57.6782	7.7093	20.5034	7.40467	26.3381	2.98554	1.49968	0.74984	124.869
2	1	57	4	4	2	1	7	1	2	89.8167	17.9737	17.4	18.1649	64.557	6.52263	3.25056	1.62528	219.311
2	1	57	4	4	2	2	7	1	2	98.0831	12.1146	83.6775	5.92842	54.8555	3.86355	2.24952	1.12476	261.897
2	1	82	7	4	2	2	7	1	2	102.213	13.9658	17.4572	8.55287	23.5497	4.13842	2.43698	1.21849	173.533
2	1	58	4	4	2	2	4	1	2	118.998	12.1146	28.2596	3.09309	55.0898	6.48331	2.24952	1.12476	227.413
2	1	58	4	4	2	1	10	2	2	140.218	26.7365	22.6124	8.06078	52.1608	7.72898	2.43698	1.21849	261.173
2	1	67	5	4	2	2	7	1	2	139.332	12.8227	29.2518	9.75846	50.2301	5.51683	2.07426	2.16855	251.155
2	1	58	4	4	2	2	10	2	2	121.302	15.4186	22.6124	8.38884	78.0537	6.95946	2.62444	1.31222	256.672
2	1	67	5	4	2	1	7	1	2	96.447	12.1146	22.6124	17.9493	28.3299	8.37197	2.06206	1.03103	188.918
2	1	66	5	4	2	1	10	2	2	74.6763	6.69232	24.8572	6.40551	43.2611	13.2618	1.52967	0.764837	171.449
2	1	44	3	4	2	1	11	2	2	50.4386	8.98684	13.7432	7.52887	35.8517	3.28976	1.72088	0.860442	122.42
2	1	57	4	4	2	1	9	2	2	120.685	13.4803	31.6929	5.54507	46.0336	8.27315	2.48572	1.24286	229.438
2	1	75	6	4	2	1	11	2	2	121.594	10.1102	14.4841	12.3808	38.8872	5.01972	1.91209	0.956046	205.344
2	1	58	4	4	2	1	14	2	2	145.033	17.6212	48.271	9.91195	72.0784	12.9676	2.99936	1.71057	310.593
2	1	77	6	4	2	1	13	2	2	78.2765	5.78408	2.50962	8.05469	34.2982	2.20536	1.33846	1.33846	133.805
2	1	67	5	4	2	1	15	3	2	75.3224	8.98684	21.6305	29.494	24.1402	6.52549	1.72088	0.860442	168.681
2	1	64	5	4	2	1	6	1	2	70.2075	9.91195	23.4325	7.80303	39.7415	5.25216	1.8746	0.9373	159.161
2	1	66	5	4	2	2	10	2	2	112.237	11.7163	49.5598	18.2539	56.5661	4.58785	2.06206	1.40595	256.389
2	1	56	4	4	2	1	8	2	2	62.4709	8.00689	15.8943	7.83958	32.1471	4.55437	1.52967	0.764837	133.208
2	1	50	4	4	2	1	9	2	2	70.3414	8.98684	8.00689	15.5358	26.6259	2.88917	1.72088	0.860442	134.967
2	1	55	4	4	2	2	9	2	2	49.2134	4.49904	32.3603	6.5611	39.8821	3.80216	1.12476	0.56238	138.005
2	1	55	4	4	2	1	23	4	2	55.6998	9.91195	20.7378	5.67067	29.8764	2.68677	1.68714	0.84357	127.114
2	1	51	4	4	2	2	11	2	2	82.6915	30.1811	28.4705	9.25584	36.6016	5.79955	2.43698	1.40595	196.843
2	1	55	4	4	2	2	12	2	2	165.384	19.8239	24.0183	8.99808	78.1709	6.28554	3.37428	1.68714	307.742
2	1	65	5	4	2	1	13	2	2	41.5978	5.06705	15.1772	3.25056	79.4714	10.3021	1.52967	1.14726	157.543
2	1	50	4	4	2	1	7	1	2	147.552	15.4186	29.7593	42.8581	24.1355	8.44953	2.8119	1.40595	272.391
2	1	60	5	4	2	1	13	2	2	208.626	20.7223	26.4108	14.0778	89.5815	7.25233	3.44177	3.44177	373.555
2	1	68	5	4	2	1	15	3	2	76.8936	6.81183	25.9806	8.1503	29.5179	2.55551	1.33846	0.956046	152.204
2	1	79	6	4	2	2	14	2	2	115.746	13.2159	41.9442	2.41355	58.7219	3.72671	2.43698	1.21849	239.424
2	1	46	3	4	2	2	9	2	2	251.13	14.6922	27.8847	79.7877	114.749	6.07535	2.06206	2.06206	498.443
2	1	50	4	4	2	1	28	4	2	55.7851	5.61677	44.9342	4.1349	25.8372	3.58613	1.14726	0.573628	141.615
2	1	50	4	4	2	2	15	3	2	76.9217	11.7163	12.0677	12.8176	52.5123	1.12499	0.9373	0.46865	168.566
2	1	56	4	4	2	2	9	2	2	48.9722	11.7856	34.2018	4.40781	51.998	2.40567	0.942847	0.942847	155.657
2	1	58	4	4	2	2	16	3	2	101.7	9.91195	31.2824	3.35085	71.5395	5.96896	1.68714	1.96833	227.409
2	1	60	5	4	2	2	7	1	2	139.066	19.5896	0.702975	253.985	1.52311	1.22037	4.12412	4.12412	424.335
2	1	57	4	4	2	2	8	2	2	199.639	14.739	55.5585	150.202	54.9727	24.6695	3.18682	4.78023	507.749
2	1	62	5	4	2	2	8	2	2	230.3	20.0348	2.8119	121.638	47.4743	2.11314	2.8119	2.8119	429.996
2	1	60	5	4	2	2	14	2	2	273.724	19.7055	0.707135	256.525	15.8398	2.03466	4.14852	4.14852	576.833
2	1	61	5	4	2	1	14	2	2	357.333	21.3704	0.702975	289.532	18.3008	2.20031	4.49904	4.49904	698.438
2	1	56	4	4	2	1	2	1	2	184.002	14.1973	0	13.6954	21.8935	21.2613	2.29451	3.72858	261.073
2	1	55	4	4	2	2	14	2	2	279.361	22.0969	5.03799	132.534	21.3939	206.091	4.31158	4.31158	675.138
2	1	79	6	4	2	2	17	3	2	49.2649	18.3855	2.47497	40.8724	27.6018	136.864	2.4514	2.4514	280.366
2	1	79	6	4	2	2	13	2	2	134.063	14.402	57.2779	6.85921	89.8768	6.7456	2.4514	1.88569	313.562
2	1	70	6	4	2	2	8	2	2	87.5785	11.0133	16.6371	3.11652	44.3109	4.48779	1.8746	1.0779	170.097
2	1	64	5	4	2	2	4	1	2	102.603	11.0133	25.1899	1.8746	44.9201	3.38014	1.8746	1.8746	192.731
2	1	67	5	4	2	2	11	2	2	108.105	12.1146	21.4642	8.13108	19.3787	5.60482	2.06206	2.06206	178.923
2	1	65	5	4	2	2	12	2	2	161.918	14.3876	45.6934	5.92842	114.702	10.7583	2.43698	2.78847	358.613
2	1	63	5	4	2	2	7	1	2	103.224	14.3173	14.6453	15.7232	31.1652	10.1268	2.43698	2.92906	194.568
2	1	63	5	4	2	2	7	1	2	214.15	248.385	47.568	25.8461	102.634	8.99457	3.7492	3.7492	655.076
2	1	77	6	4	2	2	10	2	2	65.3676	6.60797	45.8106	2.7416	43.5845	2.70036	1.12476	0.56238	168.5
2	1	66	5	4	2	1	8	2	2	84.3613	13.4803	28.6814	17.3761	29.2789	4.97694	2.48572	1.24286	181.884
2	1	63	5	4	2	2	11	2	2	57.0537	8.81062	31.5167	10.2869	34.4458	4.41539	1.68714	0.84357	149.06
2	1	66	5	4	2	1	13	2	2	118.686	8.81062	19.3553	2.13236	38.2184	2.95531	1.49968	0.74984	192.408
2	1	66	5	4	2	1	8	2	2	139.27	14.6688	0.702975	29.0094	30.2045	7.09161	2.62444	1.31222	224.884
2	1	55	4	4	2	2	4	1	2	63.0229	13.2159	21.9328	15.114	69.8523	5.06775	2.24952	1.12476	191.58
2	1	63	5	4	2	2	6	1	2	153.202	20.0348	39.2495	18.91	53.6839	7.49465	2.8119	1.40595	296.793
2	1	74	6	4	2	1	10	2	2	420.343	20.6909	22.9404	242.573	59.6357	9.47798	4.12412	4.54591	784.331
2	1	73	6	4	1	2	6	1	2	63.2735	9.9706	31.7032	8.06134	34.7675	3.79826	1.88569	0.942847	154.403
2	1	73	6	4	2	2	10	2	2	21.2814	8.81062	16.5199	2.97593	35.1722	2.13704	1.49968	0.74984	89.1466
2	1	73	6	4	2	2	7	1	2	105.608	7.75491	11.432	12.5163	39.7174	2.95865	1.50855	0.754277	182.25
2	1	73	6	4	2	2	12	2	2	309.623	18.6991	56.6129	59.1905	71.6097	6.62273	2.62444	2.62444	527.607
2	1	54	4	4	2	1	12	2	2	115.509	11.0133	0	4.52247	37.6326	4.67057	1.8746	0.9373	176.16
2	1	70	6	4	2	1	6	1	2	160.575	17.3635	14.6922	25.3071	25.518	5.41478	2.43698	2.43698	253.745
2	1	62	5	4	2	1	11	2	2	219.666	25.4786	47.6828	196.874	26.4586	16.5327	4.97144	4.97144	542.635
2	1	60	5	4	2	2	16	3	2	83.7112	21.019	2.46041	115.85	11.974	3.97814	3.37428	4.12412	246.491
2	1	61	5	4	2	1	10	2	2	110.546	10.5404	38.4809	7.73203	38.1941	1.05237	1.72088	1.72088	209.988
2	1	61	5	4	2	1	7	1	2	75.7292	8.07859	12.4286	4.46952	54.5424	2.13605	1.33846	1.33846	160.061
2	1	77	6	4	2	2	9	2	2	81.6878	12.1146	0.351488	4.03039	54.176	6.79308	2.06206	1.03103	162.246
2	1	78	6	4	2	1	11	2	2	99.3409	5.61677	1.31456	2.34231	27.1756	0.328641	0.956046	1.43407	138.509
2	1	61	5	4	2	1	8	2	2	155.517	19.8141	14.3407	41.6836	31.7168	19.5832	3.25056	3.46567	289.371
2	1	61	5	4	2	1	16	3	2	157.489	17.0654	3.10715	50.5032	32.4578	17.0026	2.86814	1.72088	282.214
2	1	62	5	4	2	2	10	2	2	198.038	31.6808	19.8005	112.148	40.2805	67.5522	5.24888	5.24888	479.997
2	1	62	5	4	2	1	9	2	2	119.582	6.2143	79.8179	133.368	47.7784	799.932	1.33846	0.669232	1188.7
2	1	67	5	4	2	1	7	1	2	47.2337	7.17035	17.3283	6.38161	52.4869	2.80528	1.33846	0.669232	135.414
2	1	61	5	4	2	2	10	2	2	87.5033	11.0133	16.7777	13.2159	19.777	4.92575	2.06206	1.03103	156.306
2	1	65	5	4	2	1	8	2	2	112.24	13.4803	3.58517	3.65688	134.253	1.41495	2.29451	1.14726	272.071
2	1	68	5	4	2	2	6	1	2	102.169	16.4028	17.8087	5.24888	69.5243	3.40638	1.31222	1.31222	217.185
2	1	68	5	4	2	1	18	3	2	119.3	15.727	23.0646	22.6583	39.7237	8.68281	2.67693	2.67693	234.51
1	1	80	7	4	2	1	10	2	2	313.392	27.2473	56.6457	133.918	106.384	7.30802	3.63298	3.63298	652.162
1	1	51	4	4	2	2	6	1	2	129.93	12.1146	36.5547	17.5275	61.6041	5.81197	2.24952	1.12476	266.917
1	1	75	6	4	2	2	8	2	2	85.1205	14.3173	14.6453	7.5687	28.7048	4.57707	2.62444	1.31222	158.87
1	1	70	6	4	2	1	11	2	2	45.4581	13.4803	11.2335	17.2566	58.032	8.09054	2.29451	1.14726	156.993
1	1	68	5	4	2	2	11	2	2	200.997	20.9252	30.9309	7.31094	68.1886	6.99953	3.56174	3.56174	342.475
6	2	41	3	3	2	2	34	5	2	77.1602	7.7093	4.80366	12.3489	19.4724	3.23228	1.31222	0.65611	126.695
6	2	52	4	3	2	2	18	3	2	119.704	11.7631	45.9512	10.7555	35.8752	6.29163	2.24952	1.12476	233.715
6	2	65	5	3	2	2	10	2	2	109.527	13.2159	36.8125	8.78719	60.8308	5.00893	2.24952	2.24952	238.681
6	2	75	6	3	2	1	11	2	2	136.054	11.2335	94.553	8.1742	72.9463	5.33163	2.1033	1.05165	331.447
6	2	74	6	3	2	1	20	3	2	220.194	23.8295	31.191	50.79	42.0899	12.687	4.01539	4.01539	388.812
6	2	49	3	3	2	2	9	2	2	108.19	16.6177	12.257	3.81853	41.1553	7.07465	2.82854	1.41427	193.356
6	2	80	7	3	2	1	9	2	2	197.003	16.0616	41.6119	6.78793	54.7337	6.14738	4.01539	2.0077	328.369
6	2	75	6	3	2	1	14	2	2	59.9152	7.86348	17.0176	12.2135	31.9319	5.06752	1.33846	0.669232	136.017
5	2	51	4	3	2	1	6	1	2	26.9043	8.00689	18.1649	3.39396	57.1238	0.813356	1.33846	1.33846	117.084
5	2	52	4	3	2	2	10	2	2	181.844	25.2368	52.1373	60.3621	86.091	27.2115	3.37428	3.37428	439.631
5	2	52	4	3	2	2	1	1	2	75.8749	14.4727	22.7462	16.6412	25.6926	6.55703	2.63997	1.31999	165.945
5	2	56	4	3	2	1	8	2	2	154.983	14.6036	23.0646	22.5388	45.9141	8.3666	2.67693	1.33846	273.486
5	2	66	5	3	2	2	10	2	2	66.2581	11.0784	50.4659	9.66418	33.3532	4.41394	2.07426	1.03713	178.345
5	2	66	5	3	2	1	10	2	2	53.0288	5.97529	17.3283	2.22281	43.763	2.47927	0.956046	0.956046	126.71
5	2	65	5	3	2	2	6	1	2	120.592	11.0133	21.9328	8.31854	49.2317	6.17165	1.8746	0.9373	220.072
5	2	39	2	3	2	1	8	2	2	73.8414	8.98684	33.7245	2.17501	66.2301	3.26107	1.72088	0.860442	190.8
5	2	78	6	3	2	1	12	2	2	97.8561	12.3569	22.3237	12.6915	22.2042	5.57757	2.29451	1.14726	176.452
5	2	48	3	3	2	1	6	1	2	151.718	12.3569	49.1886	42.4246	54.7815	8.43472	2.29451	1.14726	322.346
5	2	58	4	3	2	1	16	3	2	88.6691	12.1146	14.7625	11.2945	25.8929	7.44451	2.06206	2.06206	164.302
5	2	77	6	3	2	2	15	3	2	75.6992	9.98225	15.1374	9.56046	40.4445	4.74063	1.68714	1.68714	158.939
5	2	47	3	3	2	1	3	1	2	0	1.17163	1.9449	0.18746	0	0	0.18746	0.18746	3.6789
5	2	40	3	3	2	1	13	2	2	102.686	8.24824	35.2659	5.34261	40.9132	4.52622	2.06206	1.03103	200.075
1	2	80	7	3	1	1	7	1	2	121.164	13.0022	33.7006	22.0369	82.6024	9.03703	2.29451	1.14726	284.985
6	1	70	6	3	2	2	7	1	2	45.6432	8.86276	27.3425	8.13205	35.2625	3.28959	1.69712	0.848562	131.078
6	1	55	4	3	2	1	14	2	2	76.382	8.88092	21.2299	8.67003	16.2856	3.35483	1.68714	0.84357	137.334
6	1	62	5	3	2	1	4	1	2	149.904	15.4186	39.2495	30.6732	41.1241	11.0908	2.62444	1.31222	291.397
6	1	44	3	3	2	1	28	4	2	73.8954	9.91195	19.3318	2.13236	40.6788	2.82502	1.68714	0.84357	151.306
6	1	46	3	3	2	2	14	2	2	125.6	18.6991	70.8833	38.5465	57.4331	8.17373	2.62444	2.62444	324.585
6	1	44	3	3	2	2	22	4	2	155.261	22.7061	8.20138	5.60037	50.7548	10.5017	3.18682	3.98353	260.195
6	1	55	4	3	2	1	6	1	2	36.5712	7.07474	0.358517	16.5396	12.7871	5.59717	1.52967	0.764837	81.2228
6	1	60	5	3	2	1	6	1	2	202.841	20.0053	15.6553	35.4215	50.0251	16.4048	3.05935	5.52117	348.933
5	1	65	5	3	2	2	8	2	2	136.723	16.5199	42.2957	11.3648	65.1658	6.21899	2.8119	1.40595	282.506
5	1	44	3	3	2	1	3	1	2	139.173	15.727	22.2281	18.6668	21.1286	7.82715	2.86814	1.43407	229.053
5	1	55	4	3	2	2	9	2	2	155.675	18.7226	24.2526	9.30271	77.7022	9.90633	3.18682	1.59341	300.342
5	1	60	5	3	1	1	7	1	2	77.4825	17.6869	11.3531	213.461	56.0004	1.22685	3.82419	3.82419	384.859
5	1	56	4	3	2	1	29	5	2	78.43	12.3569	21.6305	12.2374	35.7561	6.20139	2.29451	1.14726	170.054
5	1	74	6	3	2	2	9	2	2	64.0825	8.81062	21.2064	10.8024	21.7219	6.93649	1.68714	0.84357	136.091
5	2	60	5	2	2	2	5	1	2	116.986	11.0133	35.8283	7.84989	73.2969	5.70511	1.8746	1.68714	254.241
5	2	45	3	2	2	2	3	1	2	152.036	17.6212	53.8948	14.3407	51.1063	21.8593	2.99936	1.49968	315.357
5	2	52	4	2	2	2	9	2	2	138.316	15.4186	48.2944	8.08422	73.953	7.65728	2.62444	1.31222	295.66
5	2	74	6	2	2	2	9	2	2	87.2285	8.81062	1.17163	7.61557	44.428	2.84025	1.68714	0.84357	154.625
5	2	37	2	2	2	2	9	2	2	57.147	7.7093	24.0418	3.79607	47.9429	4.59418	1.31222	0.65611	147.2
5	2	55	4	2	2	1	8	2	2	82.7453	13.4803	32.8163	5.25826	59.3227	4.87225	2.29451	2.29451	203.084
5	2	47	3	2	2	2	15	3	2	39.9079	8.45914	14.2001	9.13868	41.2881	4.97261	1.49968	0.74984	120.216
5	2	47	3	2	2	2	9	2	2	128.781	49.2083	45.3419	5.53007	36.4376	3.22759	3.93666	1.96833	274.431
3	2	68	5	2	2	2	12	2	2	182.246	23.081	32.3603	12.6301	69.3837	14.9153	3.7492	3.7492	342.114
2	2	64	5	2	2	2	8	2	2	45.6761	8.81062	10.8961	7.07662	64.3925	0.983228	1.49968	0.74984	140.085
2	2	39	2	2	2	2	13	2	2	18.1093	4.40531	19.0975	3.60861	34.4224	1.62012	0.74984	0.37492	82.388
2	2	40	3	2	2	2	11	2	2	80.6688	14.3173	37.2811	14.3876	33.0398	6.47628	2.43698	1.21849	189.826
2	2	38	2	2	2	2	9	2	2	69.5725	9.91195	22.05	11.0836	25.9867	5.03752	1.8746	0.9373	146.454
2	2	51	4	2	2	2	11	2	2	44.2186	13.2862	31.3058	15.1843	38.1013	4.64315	2.24952	2.24952	151.238
2	2	53	4	2	2	2	7	1	2	64.4931	6.74856	15.3717	9.32614	29.8764	4.66776	1.68714	1.0779	133.249
2	2	54	4	2	2	2	8	2	2	64.5762	9.91195	16.2856	15.5592	33.5085	5.91554	1.8746	0.9373	148.569
2	2	27	1	2	2	2	13	2	2	145.998	9.91195	23.6903	13.9189	61.4166	4.25042	1.68714	1.68714	262.561
2	2	44	3	2	2	2	7	1	2	230.623	14.6922	82.7168	77.96	74.2811	6.30311	2.06206	2.83533	491.473
2	2	49	3	2	2	2	8	2	2	93.1438	9.4433	23.4325	6.44394	16.5199	3.65617	1.68714	0.84357	155.17
2	2	44	3	2	2	2	6	1	2	109.357	20.2926	12.1849	18.0196	65.1658	10.4877	3.37428	1.68714	240.569
2	2	36	2	2	2	2	8	2	2	70.3758	9.91195	10.2166	9.84165	35.1722	4.48826	1.8746	0.9373	142.818
2	2	41	3	2	2	2	9	2	2	43.1924	4.00696	39.9524	10.8961	21.9328	4.37508	0.56238	0.28119	125.199
2	2	48	3	2	2	2	13	2	2	17.5282	3.79607	3.39771	1.92147	12.6301	1.23325	0.56238	0.257758	41.327
2	2	46	3	2	2	2	9	2	2	9.07986	7.80303	13.1456	0.304623	39.1792	0.306732	1.68714	0.84357	72.3497
2	2	48	3	2	2	2	9	2	2	73.4044	7.7093	12.3021	6.23305	27.6738	4.01446	1.49968	0.74984	133.587
2	2	48	3	2	1	1	4	1	2	80.914	10.1102	20.6745	3.63298	38.9589	10.3999	1.72088	0.860442	167.272
2	2	47	3	2	2	1	13	2	2	81.1177	16.0138	6.83573	17.9976	27.5341	7.40697	2.67693	1.33846	160.921
2	2	46	3	2	2	1	14	2	2	117.092	5.78408	2.1511	3.22666	9.89508	0.608285	2.1033	1.05165	141.912
2	2	40	3	2	2	1	24	4	2	44.1397	40.2257	32.3861	183.609	42.807	32.2343	5.35386	8.38931	389.145
2	2	59	4	2	2	2	8	2	2	62.129	13.2159	35.9923	17.012	21.0893	5.73347	2.43698	1.21849	158.827
6	1	67	5	2	2	2	8	2	2	64.9123	9.91195	22.0266	11.2007	48.1538	3.20557	1.68714	0.84357	161.942
6	1	45	3	2	2	2	9	2	2	49.9778	8.81062	21.7922	6.18618	48.4116	3.00452	1.49968	0.74984	140.432
6	1	44	3	2	2	2	10	2	2	62.5022	16.3325	8.31854	19.8708	45.2482	6.95711	2.8119	1.40595	163.447
6	1	45	3	2	2	1	6	1	2	52.8373	6.38161	15.1772	9.29755	28.6814	3.91597	1.33846	0.669232	118.299
5	1	56	4	2	2	2	4	1	2	118.365	11.3179	33.9771	3.49144	14.9031	1.2363	1.68714	0.84357	185.821
5	1	53	4	2	2	2	17	3	2	65.7162	5.50664	20.0348	2.17922	42.5534	4.2455	0.9373	0.46865	141.642
5	1	53	4	2	2	1	16	3	2	148.643	14.6036	35.7561	29.3267	76.5315	10.5136	2.67693	1.33846	319.39
5	1	52	4	2	2	2	13	2	2	77.7891	16.5199	5.97529	8.71689	33.86	4.89646	2.8119	2.8119	153.381
5	1	43	3	2	2	2	25	4	2	118.981	15.0671	37.2811	7.73273	60.2684	6.92524	2.62444	1.31222	250.192
5	1	54	4	2	3	1	15	3	2	126.501	17.7108	33.2465	5.54507	53.8015	5.58092	2.48572	1.24286	246.115
5	1	35	2	2	3	2	2	1	2	130.432	16.5199	0	6.74856	45.7168	4.3936	2.8119	1.40595	208.029
5	1	55	4	2	3	2	20	3	2	143.691	17.3635	32.2197	5.57694	72.6642	7.00585	2.43698	1.21849	282.177
5	1	50	4	2	2	2	6	1	2	103.21	9.91195	20.0348	7.14692	18.2071	4.9855	1.8746	0.9373	166.308
5	1	55	4	2	2	1	13	2	2	74.6555	21.0893	35.43	6.65483	53.4496	5.00378	1.8746	0.9373	199.095
5	1	51	4	2	2	1	20	3	2	68.6558	6.88353	17.5913	9.34535	39.9627	4.30555	1.33846	0.669232	148.752
5	1	44	3	2	2	1	2	1	2	31.1254	4.40531	0	0	21.019	0.305326	0.74984	0.74984	58.3547
5	1	49	3	2	2	1	24	4	2	246.486	40.1165	1.17163	9.30271	47.2165	9.80932	4.6865	2.34325	361.132
5	1	50	4	2	2	2	7	1	2	20.9653	10.4743	29.5484	8.06078	31.8448	2.24858	1.68714	0.84357	105.673
5	1	47	3	2	2	1	5	1	2	32.8913	14.247	2.10893	211.338	15.4655	1.25598	2.99936	2.99936	283.305
5	1	45	3	2	2	2	10	2	2	49.7378	4.40531	0.702975	16.8011	31.8916	2.4801	0.74984	0.37492	107.144
5	1	46	3	2	2	2	12	2	2	124.11	12.138	8.67003	146.383	0	1.27262	2.62444	2.62444	297.822
5	1	48	3	2	2	2	9	2	2	151.18	19.0741	0.702975	229.1	37.0234	0.856224	4.12412	4.12412	446.184
5	1	53	4	2	2	2	3	1	2	166.556	23.3622	5.50664	19.0506	70.1101	17.2742	3.7492	5.6238	311.233
5	1	40	3	2	2	2	11	2	2	113.837	11.0133	22.6124	27.3926	40.2102	3.50339	1.8746	0.9373	221.38
5	1	40	3	2	2	2	10	2	2	182.705	11.2476	43.7251	8.74033	59.8935	11.0993	2.8119	2.8119	323.034
5	1	43	3	2	2	2	9	2	2	89.8297	8.81062	26.5022	14.9031	22.5889	3.77779	1.68714	0.84357	168.943
5	1	43	3	2	2	2	29	5	2	59.1849	12.138	13.5909	128.949	20.0348	0.344458	2.62444	2.62444	239.491
5	1	43	3	2	2	2	24	4	2	237.911	12.138	5.97529	133.214	24.1355	1.31222	2.62444	2.62444	419.935
5	1	47	3	2	2	1	10	2	2	76.9947	10.1102	9.20195	30.8325	55.4746	7.03316	1.72088	0.860442	192.228
5	1	74	6	2	2	2	16	3	2	133.505	11.0784	37.4782	19.8233	45.8695	5.08713	1.88569	0.942847	255.671
5	1	64	5	2	2	2	14	2	2	231.176	18.746	40.796	13.6846	82.623	19.2899	2.99936	2.27295	411.588
5	1	59	4	2	2	2	11	2	2	83.199	9.91195	13.5909	28.0018	19.777	4.5363	1.8746	0.9373	161.829
3	1	52	4	2	1	2	11	2	2	115.341	13.8486	56.8238	41.3115	63.2678	9.44072	2.43698	1.21849	303.689
2	1	56	4	2	2	1	11	2	2	325.325	31.4539	29.016	10.8511	108.965	11.5058	5.35386	3.53737	526.009
2	1	46	3	2	2	2	6	1	2	117.536	20.2223	155.662	4.85053	71.8441	5.45603	1.68714	0.84357	378.102
2	1	59	4	2	2	2	10	2	2	19.7639	4.8271	2.34325	3.18682	38.1013	3.35928	0.74984	0.585813	72.9173
2	1	32	2	2	2	2	7	1	2	56.2359	9.23241	5.74096	3.51488	9.02152	79.5948	1.49968	1.54655	166.387
2	1	36	2	2	2	2	8	2	2	83.1465	9.91195	25.0962	11.1773	16.0513	4.39313	1.68714	1.68714	153.151
2	1	49	3	2	2	1	14	2	2	56.7538	13.1217	12.9305	14.0539	23.208	4.27162	2.48572	1.24286	128.068
2	1	37	2	2	2	1	16	3	2	64.6283	8.81062	13.6143	13.0988	15.7935	5.13734	1.68714	0.84357	123.614
2	1	58	4	2	2	1	10	2	2	96.0803	11.0133	5.97529	8.506	34.188	3.24259	1.8746	1.8746	162.755
2	1	58	4	2	2	2	7	1	2	115.967	12.1146	33.3913	40.6085	29.3375	6.70521	2.24952	1.12476	241.498
2	1	61	5	2	2	2	11	2	2	417.726	26.4319	31.0481	32.8758	49.7004	9.97381	4.6865	2.34325	574.785
2	1	46	3	2	2	2	7	1	2	120.119	10.6852	8.38884	4.42874	40.7726	2.81588	1.49968	0.74984	189.46
2	1	51	4	2	2	2	13	2	2	2.87517	1.73401	6.44394	0.796705	36.9062	1.91865	0.37492	0.18746	51.2371
2	1	51	4	2	2	2	8	2	2	77.8468	8.81062	22.0266	4.35845	51.2235	4.31533	1.49968	1.49968	171.581
2	1	54	4	2	2	2	8	2	2	80.4035	14.7625	12.7707	22.0734	27.1583	8.05047	2.06206	1.73401	169.015
2	1	52	4	2	2	1	3	1	2	101.213	15.4401	43.6196	208.179	53.4669	54.6113	3.25056	4.87584	484.656
2	1	55	4	2	2	1	4	1	2	160.616	16.5199	25.8929	6.91259	64.8143	9.3477	2.99936	1.78087	288.883
2	1	47	3	2	2	2	9	2	2	144.816	12.1849	5.97529	22.6358	29.8296	6.13252	2.24952	1.12476	224.948
2	1	50	4	2	1	1	9	2	2	46.9835	10.8989	30.474	8.07859	32.8641	3.02445	1.52967	0.764837	134.618
2	1	49	3	2	2	1	12	2	2	70.283	13.3565	17.5744	25.9867	27.9316	3.19713	1.8746	1.8746	162.078
2	1	49	3	2	2	1	8	2	2	150.301	8.24824	26.5959	19.4256	35.6174	3.84762	2.06206	1.03103	247.129
2	1	47	3	2	2	1	7	1	2	35.6627	15.4401	0.717035	218.624	1.55358	0.732332	3.25056	3.25056	279.231
2	1	42	3	2	2	2	7	1	2	57.1355	15.4186	1.64028	9.56046	28.2362	3.22666	2.62444	2.62444	120.467
2	1	43	3	2	2	2	8	2	2	87.8644	8.24824	28.0253	14.1767	40.3039	7.01522	2.24952	1.12476	189.008
2	1	45	3	2	2	2	12	2	2	90.3977	8.24824	27.6504	8.92779	34.5864	4.41	2.06206	1.03103	177.314
2	1	49	3	2	2	2	6	1	2	95.0373	12.1146	27.5332	4.70993	62.2367	3.89776	2.06206	1.03103	208.623
2	1	49	3	2	2	1	10	2	2	112.03	13.4803	0.358517	19.7185	31.7407	7.28244	2.48572	1.24286	188.339
2	1	44	3	2	2	1	8	2	2	118.39	16.5199	26.385	19.9645	39.8118	8.19716	2.8119	1.40595	233.486
2	1	43	3	2	2	1	8	2	2	373.921	25.3774	35.2894	93.73	88.528	8.24239	3.56174	3.56174	632.211
2	1	34	2	2	2	2	6	1	2	24.1296	5.50664	30.6966	8.95122	34.4458	1.82586	0.9373	0.46865	106.962
2	1	39	2	2	2	2	14	2	2	57.3729	8.81062	20.5034	5.67067	42.7643	3.5676	1.68714	0.84357	141.22
2	1	38	2	2	2	2	15	3	2	64.1561	12.1146	33.2742	16.2153	30.6029	6.41957	2.06206	1.03103	165.876
2	1	36	2	2	2	2	10	2	2	67.3373	11.0133	22.6124	7.82646	40.0696	4.54872	1.8746	1.8746	157.157
2	1	39	2	2	2	2	6	1	2	85.8612	9.91195	15.3483	12.6301	25.5414	4.71532	1.8746	0.9373	156.82
2	1	39	2	2	2	2	9	2	2	134.035	9.91195	14.2001	1.99176	44.428	3.42068	1.8746	0.9373	210.8
2	1	34	2	2	2	2	8	2	2	151.735	14.3173	14.6453	18.4883	18.1602	7.67977	2.62444	1.31222	228.962
2	1	28	1	2	2	2	13	2	2	77.7409	8.81062	5.97529	5.67067	45.0139	2.63217	1.68714	0.84357	148.374
2	1	50	4	2	2	2	8	2	2	88.0455	18.746	72.1956	12.0677	60.948	3.45958	1.68714	0.84357	257.993
2	1	46	3	2	2	2	10	2	2	49.5471	6.60797	6.23305	5.45977	29.8764	1.83523	1.31222	0.65611	101.528
2	1	46	3	2	2	2	5	1	2	58.5428	7.7093	11.8568	8.34197	46.5604	2.37582	1.49968	0.74984	137.637
2	1	46	3	2	2	2	7	1	2	59.8736	12.1146	1.17163	3.93666	36.3204	1.83851	2.06206	1.03103	118.348
2	1	46	3	2	2	2	6	1	2	64.4959	8.01392	1.17163	2.8822	51.6921	2.19469	1.12476	1.12476	132.7
2	1	47	3	2	2	2	13	2	2	87.7847	11.0133	34.3286	5.92842	27.6738	3.02373	1.8746	0.9373	172.565
2	1	48	3	2	2	2	8	2	2	87.9804	7.7093	15.5826	4.7568	39.3666	5.34753	1.49968	0.74984	162.993
2	1	46	3	2	2	1	8	2	2	88.9847	6.7017	3.16339	9.34957	16.7074	0.572222	2.24952	1.12476	128.853
2	1	47	3	2	2	2	9	2	2	95.3063	14.3173	11.0133	7.28751	39.5072	8.85796	2.43698	1.49968	180.226
2	1	48	3	2	2	1	13	2	2	99.0825	17.7108	31.191	10.1819	66.4452	8.90031	2.48572	2.48572	238.483
2	1	51	4	2	2	2	9	2	2	43.3712	0	42.4831	0.37492	32.6181	2.4965	0	0	121.344
2	1	41	3	2	2	2	13	2	2	57.0514	1.78087	28.1424	26.8068	31.5402	6.77504	0.37492	0.56238	153.034
2	1	40	3	2	2	2	16	3	2	58.933	15.4186	9.84165	4.63964	16.1919	8.78883	2.62444	1.21849	117.657
2	1	42	3	2	2	1	11	2	2	59.3508	6.09245	72.055	6.74856	35.6408	3.04154	0.9373	1.21849	185.085
2	1	53	4	2	2	2	8	2	2	62.0954	27.9784	0	106.173	0	46.8599	4.49904	5.13172	252.737
2	1	59	4	2	2	2	4	1	2	38.012	7.7093	17.9259	5.31918	31.8916	2.53329	1.31222	1.31222	106.016
2	1	46	3	2	2	2	14	2	2	173.817	18.3242	55.4882	17.2932	127.121	12.8417	2.99936	1.49968	409.385
2	1	53	4	2	2	2	10	2	2	92.7599	26.3147	3.96009	5.67067	26.4787	1.74104	2.8119	1.40595	161.143
2	1	39	2	2	2	1	9	2	2	87.3525	10.1102	34.2982	11.8072	24.4748	6.07687	1.91209	0.956046	176.988
1	1	66	5	2	2	2	8	2	2	60.5937	13.4971	22.6124	10.5446	27.8847	5.8436	2.43698	1.21849	144.632
1	1	61	5	2	2	2	8	2	2	81.8828	11.5757	24.0418	20.1637	56.0037	6.75348	2.06206	1.03103	203.514
1	1	51	4	2	2	2	10	2	2	22.9336	4.21785	2.92906	3.04623	54.5977	3.50363	0.56238	0.56238	92.3529
1	1	43	3	2	2	2	16	3	2	351.684	12.138	3.51488	145.352	0	1.67332	2.62444	2.62444	519.611
5	2	59	4	1	2	1	14	2	2	97.8329	13.4803	15.1772	8.07859	52.7738	8.34915	2.29451	2.29451	200.281
5	2	49	3	1	2	1	9	2	2	58.8805	10.1102	32.3383	10.2775	49.81	3.42312	1.72088	0.860442	167.421
5	2	52	4	1	2	1	9	2	2	23.0646	4.58902	23.0646	6.28601	26.8649	4.76685	1.14726	0.573628	90.3569
5	2	57	4	1	2	2	13	2	2	85.5713	4.40531	42.4597	5.57694	36.5781	4.5752	0.9373	0.46865	180.573
5	2	59	4	1	2	2	19	3	2	86.996	8.20138	24.9556	15.981	35.3128	6.2621	1.49968	0.74984	179.958
5	2	57	4	1	2	2	13	2	2	149.849	81.4045	62.8811	36.6953	48.1772	7.01663	2.8119	2.8119	391.648
5	2	50	4	1	2	1	16	3	2	65.5311	8.81062	19.8473	14.9734	32.3603	3.78294	1.49968	0.74984	147.555
5	2	40	3	1	2	2	13	2	2	106.183	11.0836	66.5483	9.5136	50.6142	4.50748	1.8746	1.49968	251.825
5	2	82	7	1	2	1	12	2	2	11.4996	14.3407	4.0632	114.487	2.86814	7.41892	1.91209	1.91209	158.501
5	2	80	7	1	2	2	14	2	2	69.1114	8.01392	32.8524	79.0847	40.093	3.26555	1.68714	2.10893	236.217
5	2	70	6	1	2	2	12	2	2	95.9043	9.91195	14.6453	14.5047	26.6428	6.75536	1.68714	1.89803	171.95
5	2	61	5	1	2	2	10	2	2	51.7484	6.60797	21.0893	8.17795	23.081	6.34974	1.12476	1.12476	119.304
5	2	29	1	1	2	1	7	1	2	338.765	11.8072	11.114	118.263	22.252	8.87259	2.48572	2.48572	516.045
5	2	41	3	1	2	2	12	2	2	166.113	147.625	70.6959	8.17795	129.933	12.9975	3.37428	3.37428	542.291
5	2	86	7	1	2	2	21	3	2	277.9	36.5781	28.2362	30.4623	69.4774	19.4326	4.87396	2.43698	469.398
5	2	86	7	1	2	2	17	3	2	57.4891	5.50664	19.9176	5.5535	21.5813	2.28701	0.9373	0.46865	113.741
5	2	86	7	1	2	2	18	3	2	192.697	21.7922	28.822	261.155	67.1341	7.7585	2.99936	2.99936	585.358
5	2	75	6	1	2	2	23	4	2	138.6	15.6061	5.97529	211.103	37.0234	1.17467	3.37428	3.37428	416.231
5	2	45	3	1	2	2	3	1	2	13.7793	5.50664	16.2153	2.41355	27.3926	0.309309	0.9373	0.9373	67.4913
5	2	48	3	1	2	2	4	1	2	91.9499	16.5199	27.2989	23.4559	106.524	5.93171	2.8119	1.61684	276.109
5	2	60	5	1	2	2	10	2	2	263.836	16.0278	23.7371	121.38	65.2595	4.5834	2.24952	2.24952	499.323
5	2	59	4	1	2	2	2	1	2	59.4164	8.81062	36.297	6.60797	35.9923	4.77133	1.68714	0.9373	154.52
4	2	67	5	1	2	1	18	3	2	191.797	21.8696	16.6113	11.9745	54.9966	17.8272	4.01539	2.22281	321.315
2	2	70	6	1	2	2	4	1	2	107.557	16.4028	21.9328	5.06142	35.7346	6.14682	1.31222	0.65611	194.804
2	2	25	1	1	2	1	7	1	2	71.8753	8.98684	18.9297	8.70002	25.0962	3.74005	1.52967	0.764837	139.623
2	2	50	4	1	3	2	7	1	2	10.7349	5.50664	20.0348	1.42938	29.0563	1.50202	0.9373	0.46865	69.67
2	2	52	4	1	2	1	15	3	2	98.9228	9.08244	3.22666	91.3263	16.0855	31.801	1.91209	2.86814	255.225
2	2	45	3	1	3	2	8	2	2	184.5	17.6915	19.3318	44.5686	29.9233	10.6363	3.18682	1.59341	311.431
2	2	45	3	1	2	1	11	2	2	60.936	8.1742	35.3737	172.614	52.3674	30.9429	1.72088	2.58133	364.711
2	2	62	5	1	2	2	9	2	2	210.406	19.6833	11.8334	132.722	63.174	3.07786	2.62444	2.62444	446.146
2	2	61	5	1	2	1	12	2	2	85.5124	27.2712	0	97.445	0	42.4635	4.2066	4.78023	261.679
2	2	60	5	1	2	2	12	2	2	53.0725	15.7701	0	52.7466	10.076	20.3172	2.62444	2.62444	157.231
2	2	59	4	1	2	2	6	1	2	77.1117	8.81062	40.6554	6.06902	40.96	7.80209	1.49968	0.74984	183.658
6	1	52	4	1	2	2	11	2	2	84.1834	12.1146	8.6466	10.0057	23.9246	6.68904	2.06206	1.03103	148.657
6	1	47	3	1	2	2	18	3	2	150.316	16.9183	3.51488	222.093	5.74096	1.6213	3.56174	3.56174	407.328
6	1	46	3	1	2	2	15	3	2	98.3931	19.8239	9.16211	27.5801	48.9739	4.01352	3.37428	1.68714	213.008
5	1	88	7	1	2	1	21	3	2	68.9164	8.45914	13.0753	10.3103	26.7131	4.6387	1.68714	0.84357	134.644
5	1	57	4	1	2	1	8	2	2	165.709	13.9822	40.9666	13.9344	92.3541	7.82763	2.29451	1.14726	338.216
5	1	71	6	1	2	2	8	2	2	79.6806	11.0133	16.9886	10.5915	16.2856	8.06828	2.06206	1.03103	145.721
5	1	56	4	1	2	1	10	2	2	81.3837	5.24888	43.6079	11.3882	63.2912	5.57108	1.49968	0.74984	212.74
5	1	80	7	1	2	1	11	2	2	90.9387	13.5759	57.6257	14.9382	25.5742	6.59194	2.67693	1.33846	213.26
5	1	50	4	1	2	1	11	2	2	411.681	26.7131	37.8904	182.774	67.7434	2.91899	5.6238	4.31158	739.656
5	1	50	4	1	2	2	1	1	2	77.5883	11.0133	13.708	10.7321	26.1272	5.87851	2.06206	1.03103	148.141
5	1	86	7	1	2	2	16	3	2	179.808	19.8239	37.328	8.45914	77.4679	7.13754	3.37428	3.37428	336.773
5	1	80	7	1	2	2	8	2	2	120.474	19.8239	29.4078	23.9949	29.0563	10.532	3.37428	2.24952	238.913
5	1	36	2	1	2	2	7	1	2	40.3447	7.7093	27.6504	6.18618	35.055	3.59033	1.49968	0.74984	122.785
5	1	42	3	1	2	1	12	2	2	41.443	6.60797	10.0994	4.96769	29.8764	2.91969	1.12476	0.56238	97.6013
5	1	31	2	1	2	1	8	2	2	53.8006	9.91195	28.9157	5.10829	78.4989	1.57888	1.68714	1.68714	181.189
5	1	43	3	1	2	2	21	3	2	58.4285	7.7093	24.6276	4.54591	50.4033	3.73444	1.49968	0.74984	151.699
5	1	85	7	1	2	2	22	4	2	35.7428	4.63964	14.6453	2.83533	29.7124	3.80966	1.12476	0.56238	93.0723
5	1	85	7	1	2	2	19	3	2	45.0324	14.3173	19.2147	13.1925	27.6504	6.50533	2.43698	2.43698	130.786
5	1	86	7	1	2	2	16	3	2	131.048	14.3173	31.0715	6.60797	66.8998	7.06818	2.43698	1.21849	260.668
5	1	86	7	1	2	2	15	3	2	141.228	33.0164	38.9448	9.95882	86.6066	8.26605	2.62444	2.62444	323.27
5	1	86	7	1	2	2	14	2	2	311.594	40.96	0.351488	94.8079	0	16.9096	3.37428	5.90499	473.902
5	1	77	6	1	2	2	6	1	2	84.6354	9.91195	34.5395	17.2463	17.2229	5.21467	1.8746	0.9373	171.583
5	1	42	3	1	2	1	29	5	2	80.7436	11.2335	13.7432	7.74398	27.2234	3.35094	2.1033	1.05165	147.194
5	1	55	4	1	2	1	10	2	2	103.779	16.3723	0	6.42941	41.2295	3.57227	2.67693	1.33846	175.398
5	1	38	2	1	2	1	9	2	2	35.1397	5.90359	16.3962	1.38627	30.9759	2.25627	0.956046	0.478023	93.492
5	1	50	4	1	4	1	19	3	2	44.716	4.49342	11.5204	4.0632	36.5927	1.64559	0.956046	0.478023	104.465
5	1	53	4	1	2	2	3	1	2	46.8948	5.92842	19.0975	9.5136	19.8239	4.22676	1.31222	0.65611	107.453
5	1	45	3	1	3	2	1	1	2	59.4525	8.88092	39.1323	10.3806	40.8897	3.96384	1.68714	0.84357	165.231
5	1	40	3	1	2	1	1	1	2	61.285	8.07859	41.0383	16.5874	38.0267	7.4433	1.33846	0.956046	174.754
5	1	57	4	1	3	1	1	1	2	63.2701	7.7093	17.5041	9.20898	35.2659	4.33736	1.49968	0.74984	139.545
5	1	50	4	1	2	2	7	1	2	64.8286	8.20138	27.416	9.23241	29.8764	5.44595	1.49968	0.74984	147.25
5	1	41	3	1	2	1	5	1	2	74.4636	9.96678	32.8641	13.1217	29.6374	5.21476	1.91209	0.956046	168.137
5	1	44	3	1	2	1	1	1	2	76.7175	40.871	17.9259	126.843	24.3792	5.96788	5.73628	5.73628	304.177
5	1	48	3	1	2	1	4	1	2	78.2651	14.6036	0.717035	17.1132	13.3846	6.24107	2.48572	1.52967	134.34
5	1	57	4	1	2	1	1	1	2	78.8773	10.404	26.3616	19.9411	27.5566	6.71435	1.8746	1.14819	172.878
5	1	57	4	1	2	2	17	3	2	79.3338	10.5446	22.9639	21.5813	36.1798	5.07056	1.8746	1.8746	179.423
5	1	54	4	1	2	1	9	2	2	82.687	12.0209	32.7586	2.39012	45.7168	3.20088	1.68714	0.84357	181.305
5	1	58	4	1	2	2	10	2	2	90.61	16.1919	36.3907	24.2995	51.1063	11.0939	2.62444	1.31222	233.629
5	1	45	3	1	2	1	1	1	2	92.7391	12.8176	30.8372	31.9619	67.0404	8.24215	2.06206	2.08549	247.786
5	1	45	3	1	2	1	1	1	2	94.0274	14.3173	22.3077	25.9632	47.3337	7.94409	2.62444	1.31222	215.83
5	1	51	4	1	2	1	13	2	2	97.1847	12.3569	29.2072	14.269	42.9982	6.64596	2.29451	1.14726	206.104
5	1	55	4	1	2	1	14	2	2	97.467	12.3569	18.1649	16.0616	35.4693	6.46957	2.29451	1.14726	189.431
5	1	50	4	1	2	2	1	1	2	99.669	12.1146	19.7067	5.03799	53.4496	3.96431	2.24952	1.12476	197.316
5	1	44	3	1	2	1	1	1	2	101.067	12.3569	75.9818	15.2728	20.5789	4.20254	2.29451	1.14726	232.902
5	1	57	4	1	2	1	1	1	2	104.314	7.86348	0.836541	2.29451	31.191	2.51966	1.52967	0.764837	151.314
5	1	58	4	1	2	2	1	1	2	108.894	11.5757	24.1355	13.2862	22.1437	4.63495	2.06206	1.03103	187.764
5	1	46	3	1	2	1	12	2	2	111.848	13.4803	25.8133	22.2759	31.43	6.09623	2.29451	1.14726	214.385
5	1	44	3	1	3	2	11	2	2	149.651	16.5199	29.7593	6.79543	47.1228	5.56475	2.8119	1.40595	259.632
5	1	51	4	1	2	2	4	1	2	158.513	17.6212	26.6193	7.87332	82.0372	5.97623	3.18682	1.59341	303.421
5	1	59	4	1	2	2	8	2	2	175.955	18.7226	16.1684	16.1919	68.5635	10.6173	3.18682	1.59341	310.999
5	1	57	4	1	2	2	1	1	2	185.041	13.2862	19.3318	8.76376	59.5186	10.3794	2.43698	1.21849	299.976
5	1	58	4	1	2	2	15	3	2	238.23	18.7226	44.0531	28.7283	45.5997	11.3123	3.37428	1.68714	391.707
5	1	60	5	1	3	1	1	1	2	285.884	25.8372	52.463	64.9873	45.6751	14.4963	4.58902	2.29451	496.226
5	1	57	4	1	2	1	1	1	2	317.436	29.5657	63.5771	127.919	141.447	15.4894	4.97144	3.82419	704.23
5	1	52	4	1	2	2	7	1	2	94.6924	7.7093	46.4198	1.73401	43.561	6.88471	1.31222	1.31222	203.626
5	1	37	2	1	2	1	3	1	2	136.558	15.7987	25.0962	7.28985	76.1013	9.07766	2.86814	1.43407	274.224
5	1	50	4	1	2	1	7	1	2	176.709	25.8372	44.9342	13.2173	80.6903	8.92422	4.39781	4.39781	359.108
5	1	51	4	1	2	2	21	3	2	57.0832	4.45218	19.9176	49.8409	41.9676	7.76975	0.9373	1.40595	183.375
5	1	54	4	1	4	2	13	2	2	84.0662	8.81062	0	17.9727	10.5446	5.13922	1.49968	1.31222	129.345
5	1	54	4	1	2	1	6	1	2	107.865	12.3569	14.6036	17.0176	21.9891	6.81398	2.1033	2.1033	184.853
5	1	56	4	1	2	1	9	2	2	109.195	6.88353	36.2342	4.89974	52.8455	6.1806	1.72088	1.72088	219.68
5	1	49	3	1	2	1	4	1	2	52.3383	8.98684	16.0138	4.35001	31.7885	3.47332	1.52967	0.764837	119.245
5	1	50	4	1	2	1	4	1	2	78.6585	0	12.094	0	54.9966	2.62865	0	0	148.378
5	1	49	3	1	2	1	12	2	2	34.8699	6.74013	23.8056	5.25826	61.3543	3.59306	1.14726	1.14726	137.916
5	1	50	4	1	2	1	13	2	2	59.448	11.0133	10.1931	4.6865	25.9867	3.07575	1.8746	0.9373	117.215
5	1	41	3	1	2	2	9	2	2	72.6701	11.0133	24.8385	24.815	23.1982	6.49057	2.06206	1.03103	166.119
5	1	45	3	1	2	2	24	4	2	101.666	6.74856	19.3553	5.92842	44.7561	2.64319	1.68714	0.84357	183.628
5	1	50	4	1	2	2	10	2	2	111.988	13.2159	23.784	5.13172	54.3869	3.78622	2.43698	1.21849	215.948
5	1	49	3	1	2	2	10	2	2	118.496	12.1146	33.4148	20.8784	61.5572	6.07628	2.06206	1.03103	255.63
5	1	49	3	1	2	1	11	2	2	134.125	8.1503	26.4108	19.4794	58.2232	5.44564	2.1033	1.05165	254.989
5	1	49	3	1	2	2	7	1	2	145.679	12.1146	13.3565	10.7087	45.5294	5.9467	2.24952	1.33565	236.92
5	1	46	3	1	2	2	11	2	2	175.395	15.1374	0.702975	215.884	5.85813	1.03665	3.18682	3.18682	420.388
5	1	48	3	1	2	2	25	4	2	246.096	17.8087	5.38948	259.867	22.8701	1.49617	3.7492	3.7492	561.025
5	1	50	4	1	2	2	10	2	2	253.921	34.1412	33.9068	35.8986	86.1379	21.6629	5.81126	2.90563	474.386
5	1	37	2	1	2	1	15	3	2	105.36	10.3103	14.411	32.0791	23.6668	10.8483	2.06206	1.03103	199.769
5	1	58	4	1	2	1	5	1	2	44.6987	16.5199	10.8961	3.63204	69.8289	6.08636	2.8119	2.8119	157.286
5	1	58	4	1	2	2	7	1	2	184.956	27.3223	20.9721	86.5597	38.1013	67.0929	3.93666	4.49904	433.44
5	1	58	4	1	2	2	6	1	2	189.514	0.636421	69.0871	4.19567	56.8301	9.32475	2.82854	3.25282	335.669
5	1	80	7	1	2	1	23	4	2	19.1592	30.1155	3.22666	57.1955	0	218.336	4.01539	4.01539	336.064
5	1	80	7	1	2	1	25	4	2	20.1131	28.6814	2.50962	39.9388	20.1248	137.575	3.82419	3.82419	256.591
5	1	49	3	1	2	1	16	3	2	21.3117	4.0871	1.19506	1.07555	26.0523	0.681661	0.573628	0.286814	55.2638
5	1	86	7	1	2	2	14	2	2	67.2274	9.91195	13.7315	46.865	33.6491	6.02309	1.8746	0.9373	180.22
5	1	47	3	1	2	2	15	3	2	49.5576	5.67067	21.4642	2.50728	38.4527	2.19492	2.06206	1.03103	122.941
5	1	45	3	1	2	2	2	1	2	51.8022	7.7093	18.746	29.9936	24.2761	4.01633	1.49968	0.74984	138.793
5	1	45	3	1	2	2	29	5	2	52.8248	4.49904	26.6193	6.67827	48.7396	3.12355	1.12476	1.12476	144.734
5	1	46	3	1	2	2	14	2	2	66.3388	10.1931	15.5826	13.4034	30.1108	5.6149	1.68714	0.84357	143.774
5	1	46	3	1	2	1	9	2	2	71.9325	11.2335	17.3283	11.5204	27.7253	4.64973	1.91209	0.956046	147.258
5	1	47	3	1	2	1	21	3	2	84.8169	8.98684	1.19506	19.2882	40.2974	7.58169	2.29451	1.14726	165.608
5	1	59	4	1	2	2	20	3	2	15.5465	150.53	0	2.0152	0	2.21461	1.49968	1.49968	173.306
5	1	55	4	1	2	2	10	2	2	10.0933	10.2634	11.0601	1.9449	14.9031	2.65022	1.31222	0.65611	52.8834
5	1	56	4	1	2	1	10	2	2	59.1322	15.4186	21.7922	84.7788	7.02975	7.19167	2.62444	1.31222	199.28
5	1	54	4	1	2	2	27	4	2	6.17353	2.20266	7.28751	0.28119	12.138	0.346332	0.37492	0.18746	28.9916
5	1	58	4	1	2	2	12	2	2	64.4249	14.3173	26.3616	10.3337	27.5332	4.72868	2.43698	2.43698	152.573
5	1	61	5	1	2	1	11	2	2	90.8954	11.2335	19.1448	2.79644	30.9998	4.08304	1.91209	1.91209	162.977
4	1	58	4	1	2	1	11	2	2	173.429	13.2173	24.8811	12.6915	31.6929	5.66553	2.29451	1.14726	265.019
4	1	57	4	1	2	1	5	1	2	97.3239	7.64837	23.447	8.2698	13.05	4.31081	2.1033	1.05165	157.205
4	1	62	5	1	2	2	11	2	2	48.6923	10.404	11.1304	4.78023	39.6244	3.90222	1.68714	1.68714	121.908
4	1	82	7	1	2	1	22	4	2	0	10.3103	46.5135	3.7492	45.7168	2.83651	3.7492	3.7492	116.625
4	1	62	5	1	2	1	16	3	2	50.1769	12.3569	23.949	15.7509	41.6358	6.21478	2.29451	1.14726	153.526
4	1	62	5	1	2	1	11	2	2	84.7557	8.98684	18.9058	12.094	64.318	6.16746	1.72088	0.860442	197.809
4	1	60	5	1	2	2	7	1	2	137.367	17.6212	15.5826	28.6111	86.958	4.87232	2.99936	2.99936	297.011
3	1	58	4	1	2	2	1	1	2	138.261	13.2159	51.3172	6.7017	69.0322	8.76423	2.24952	1.12476	290.667
3	1	52	4	1	2	1	17	3	2	62.7097	9.01074	67.1145	4.92364	97.0626	2.28806	1.91209	0.956046	245.977
2	1	39	2	1	2	2	7	1	2	147.652	23.9949	0	99.9397	0.351488	63.7531	3.7492	4.31158	343.751
2	1	51	4	1	2	2	20	3	2	264.575	16.2622	54.8907	53.7073	190.202	39.305	2.62444	2.62444	624.191
2	1	52	4	1	2	1	9	2	2	64.3909	8.1742	15.7031	25.9806	57.7452	3.279	1.14726	1.14726	177.567
2	1	41	3	1	2	2	1	1	2	24.3642	8.81062	1.17163	2.64787	29.0563	1.66699	1.49968	0.74984	69.9671
2	1	34	2	1	2	2	6	1	2	69.1025	5.24888	28.7283	7.00632	31.0481	3.03146	1.49968	0.74984	146.415
2	1	59	4	1	2	1	8	2	2	86.1192	11.0133	36.6953	4.6865	51.6687	6.86901	1.8746	1.10133	200.028
2	1	59	4	1	2	1	11	2	2	151.153	15.727	63.3381	13.5042	37.2141	9.74259	2.67693	1.33846	294.694
2	1	57	4	1	2	1	6	1	2	71.0668	14.6036	15.8943	1.91209	65.2741	2.87674	2.48572	1.24286	175.356
2	1	53	4	1	2	2	9	2	2	73.8773	8.81062	24.8385	8.34197	28.3299	4.72915	1.49968	0.74984	151.177
2	1	50	4	1	2	1	13	2	2	143.904	14.6036	46.7507	49.093	92.1868	8.96819	2.48572	1.24286	359.234
2	1	50	4	1	2	1	6	1	2	250.948	32.0037	95.3895	70.7713	108.918	33.1827	2.48572	4.56512	598.264
2	1	58	4	1	2	2	19	3	2	62.4929	12.1146	27.2989	8.5763	31.8682	3.9854	2.06206	1.03103	149.429
2	1	58	4	1	2	2	10	2	2	88.7602	13.2159	5.97529	14.0829	27.416	4.04867	2.24952	1.68714	157.436
2	1	32	2	1	2	2	6	1	2	52.3325	7.7093	67.017	28.658	42.8815	3.43731	1.31222	0.65611	204.004
2	1	47	3	1	2	1	4	1	2	86.3826	10.8989	33.4616	7.69617	58.8208	3.35023	1.72088	0.860442	203.192
2	1	48	3	1	2	2	2	1	2	152.74	22.1906	78.7332	70.8599	23.3153	10.8014	3.56174	3.46801	365.67
2	1	50	4	1	2	2	8	2	2	166.03	14.3173	41.8505	6.53767	76.4134	7.45013	2.43698	2.43698	317.473
2	1	50	4	1	2	1	11	2	2	30.9042	7.7093	7.99049	7.99049	24.5807	2.30482	1.31222	0.65611	83.4483
2	1	50	4	1	2	2	7	1	2	76.2787	8.81062	5.38948	4.94426	46.7713	6.69771	1.49968	1.85117	152.243
2	1	50	4	1	2	2	11	2	2	86.7734	12.1146	23.2216	15.7466	26.385	6.31694	2.24952	1.12476	173.932
2	1	55	4	1	2	1	12	2	2	15.8204	2.79644	10.9945	3.99149	27.0083	1.13076	0.573628	0.478023	62.7936
2	1	53	4	1	2	2	8	2	2	59.2763	8.01392	11.2476	1.8746	45.6231	2.59773	1.12476	0.56238	130.32
2	1	66	5	1	2	1	11	2	2	33.095	0.597529	14.1614	15.6911	37.6921	60.0956	0.0956046	1.64918	163.078
2	1	68	5	1	2	2	10	2	2	189.153	19.9411	89.6293	111.375	87.3095	2.4562	4.31158	4.31158	508.487
2	1	53	4	1	2	1	10	2	2	51.8923	6.81183	19.838	2.86814	30.8325	2.26559	0.956046	0.478023	115.942
2	1	49	3	1	2	2	13	2	2	59.9174	9.84165	7.14692	10.9664	40.3039	6.59578	1.31222	0.65611	136.74
2	1	45	3	1	2	2	13	2	2	28.658	9.34957	22.9639	20.3629	20.6675	2.23827	1.31222	0.65611	106.208
2	1	43	3	1	2	2	17	3	2	37.6504	6.67827	24.0183	49.0208	51.6921	1.99247	0.9373	0.18746	172.177
2	1	45	3	1	2	1	11	2	2	74.095	11.4965	0.358517	12.9544	27.9883	8.25594	2.48572	1.24286	138.877
2	1	49	3	1	2	2	16	3	2	81.452	11.0784	17.5605	7.94348	58.7158	3.47298	1.88569	0.942847	183.052
2	1	50	4	1	2	2	12	2	2	104.981	11.0133	22.6124	2.7416	61.5103	3.89214	1.8746	0.9373	209.563
2	1	49	3	1	2	2	13	2	2	125.895	16.8011	10.1931	22.1906	33.2507	9.04354	2.8119	1.40595	221.592
2	1	47	3	1	2	1	15	3	2	130.197	16.0278	7.84989	219.281	45.7168	1.41204	3.37428	3.37428	427.234
2	1	46	3	1	3	2	11	2	2	143.964	10.6852	0.702975	141.204	4.92083	0.934723	2.24952	2.24952	306.911
2	1	52	4	1	2	1	6	1	2	98.3886	21.511	3.22666	47.4199	0	196.136	2.86814	2.86814	372.419
2	1	53	4	1	2	1	10	2	2	78.68	3.37006	54.8532	2.29451	54.8771	2.91021	0.764837	0.382419	198.132
2	1	50	4	1	2	1	16	3	2	54.324	10.5404	25.0484	7.00304	76.1491	9.99379	1.72088	0.860442	185.64
2	1	53	4	1	2	2	6	1	2	779.165	18.746	107.116	290.411	201.871	262.202	3.18682	18.1368	1680.83
2	1	46	3	1	2	2	9	2	2	15.3607	2.34325	0	0.0702975	2.22609	3.23978	0.18746	0.09373	23.5213
2	1	45	3	1	2	2	10	2	2	40.826	12.1146	12.0677	4.66307	49.0911	5.56475	2.06206	1.03103	127.42
2	1	45	3	1	2	2	7	1	2	50.6735	3.30398	28.9626	0.984165	44.967	3.50714	0.74984	0.37492	133.523
2	1	47	3	1	2	2	8	2	2	52.0563	7.7093	4.80366	14.9968	32.3837	7.03046	1.31222	1.9449	122.237
2	1	46	3	1	2	1	15	3	2	55.2349	8.98684	26.6498	5.11485	31.43	2.80313	1.52967	0.764837	132.514
2	1	47	3	1	2	1	14	2	2	62.8084	6.81183	2.39012	3.53737	43.6674	2.78592	1.14726	0.932145	124.08
2	1	47	3	1	1	2	10	2	2	74.0606	9.91195	16.309	5.24888	29.8764	5.09727	1.68714	1.68714	143.878
2	1	48	3	1	2	1	10	2	2	134.074	12.3569	13.289	3.03545	54.399	7.10103	2.29451	1.14726	227.697
2	1	47	3	1	2	2	8	2	2	151.116	15.4186	12.5364	15.3952	29.3141	8.03524	2.8119	1.40595	236.033
2	1	63	5	1	2	2	6	1	2	90.3944	11.0133	21.0893	5.6941	39.5072	8.61051	1.8746	0.9373	179.121
2	1	45	3	1	2	1	10	2	2	80.1795	10.8989	19.5033	16.3962	58.7012	4.74653	1.72088	0.860442	193.007
2	1	51	4	1	2	1	7	1	2	109.766	13.2159	21.4407	13.1691	25.3305	4.55575	2.43698	1.21849	191.134
2	1	44	3	1	2	2	14	2	2	175.552	14.5985	23.7254	30.9309	66.8061	8.2923	2.62444	1.49968	324.029
2	1	47	3	1	2	1	11	2	2	107.927	7.86348	1.31456	3.32226	28.5141	0.450537	1.33846	0.669232	151.399
2	1	60	5	1	2	2	9	2	2	57.2102	4.40531	10.6852	4.42874	21.5579	2.48431	0.74984	0.74984	102.271
1	1	39	2	1	2	2	10	2	2	383.899	24.6041	26.2444	20.2457	164.238	17.4947	3.93666	6.32678	646.99
1	1	49	3	1	2	2	11	2	2	69.5735	13.3565	42.202	20.5034	34.3755	3.48582	1.8746	1.8746	187.246
6	2	40	3	5	2	1	10	2	3	217.189	28.1556	3.58517	90.8005	9.32145	7.03124	3.63298	3.63298	363.349
6	2	59	4	5	2	2	14	2	3	97.9395	9.70106	24.2526	24.8853	27.9081	6.04934	2.43698	1.21849	194.391
5	2	40	3	5	2	1	9	2	3	32.2656	22.2281	6.45331	76.412	7.17035	6.69352	2.86814	2.86814	156.959
5	2	45	3	5	2	1	7	1	3	66.6833	15.727	30.5935	18.3083	22.9451	8.21435	2.86814	1.43407	166.774
5	2	36	2	5	2	2	22	4	3	50.4503	11.0784	20.8841	17.9848	30.4775	8.64402	1.88569	2.09783	143.503
2	2	43	3	5	2	1	7	1	3	84.1546	12.3569	23.3275	10.9706	26.2913	5.60984	2.1033	2.1033	166.917
2	2	69	5	5	2	1	5	1	3	121.989	11.2335	32.6251	17.5435	58.6056	10.3246	2.1033	1.33846	255.763
1	2	49	3	5	2	1	11	2	3	91.4293	10.6121	39.7954	5.97529	82.8414	10.8896	1.72088	0.860442	244.125
1	2	76	6	5	2	1	4	1	3	36.302	4.85194	9.67997	11.2813	38.0267	2.84328	0.956046	0.62143	104.563
5	1	28	1	5	2	1	4	1	3	99.5782	11.2335	37.4053	11.0901	40.8949	4.67889	2.1033	1.05165	208.036
5	1	43	3	5	2	1	10	2	3	119.938	12.3569	17.1132	13.05	53.0845	7.05825	2.1033	1.05165	225.756
5	1	44	3	5	2	1	19	3	3	90.6454	10.0385	2.39012	54.0644	1.55358	8.78415	1.33846	2.0077	170.822
5	1	46	3	5	2	1	9	2	3	54.8312	10.7555	13.7432	8.96293	51.0529	3.7195	1.72088	1.72088	146.507
5	1	46	3	5	2	2	9	2	3	83.5949	13.0113	54.5672	61.1672	79.1048	5.46662	2.07426	1.03713	300.023
5	1	50	4	5	2	1	17	3	3	75.1919	7.86348	26.9127	14.3646	33.4138	5.50587	1.52967	0.764837	165.547
5	1	49	3	5	2	2	7	1	3	328.951	17.8198	11.1963	112.859	11.6677	28.6974	3.39425	3.58282	518.168
5	1	56	4	5	2	1	3	1	3	55.4081	4.49342	16.0138	4.30221	53.0845	5.26805	0.956046	0.478023	140.004
5	1	80	7	5	2	2	17	3	3	49.015	8.81062	21.9328	13.4971	55.4413	4.52013	1.49968	0.74984	155.467
5	1	80	7	5	2	2	18	3	3	122.982	16.2641	24.4197	77.8556	48.698	7.65992	2.26283	1.2257	301.367
5	1	80	7	5	2	2	23	4	3	355.564	30.2889	62.4872	39.5524	120.072	19.0476	5.09137	4.52566	636.628
5	1	80	7	5	2	2	27	4	3	86.8147	10.112	25.7161	8.5799	66.3293	5.44164	1.69712	0.848562	205.539
5	1	81	7	5	3	1	1	1	3	66.7528	10.1102	17.3283	4.56512	21.8457	3.10667	1.72088	0.860442	126.29
5	1	44	3	5	2	2	15	3	3	143.797	19.9645	6.32678	55.1601	38.7574	22.2391	3.56174	2.53071	292.338
5	1	50	4	5	2	1	12	2	3	41.6628	7.86348	19.7424	24.7855	59.9919	4.51206	1.52967	0.764837	160.853
5	1	37	2	5	2	2	7	1	3	74.2023	9.91195	29.8764	11.4116	36.461	8.98332	1.68714	1.96833	174.502
5	1	56	4	5	2	1	5	1	3	47.1221	6.74013	11.4965	11.5204	16.9698	4.39184	1.33846	0.669232	100.248
2	1	44	3	5	2	1	9	2	3	234.186	22.5627	91.3263	10.158	71.3928	11.8688	3.63298	3.63298	448.761
2	1	47	3	5	2	1	11	2	3	38.5452	7.93519	13.05	7.76788	31.669	2.53209	1.52967	0.764837	103.794
2	1	48	3	5	2	1	12	2	3	55.0425	12.2852	12.4525	8.98684	54.7576	3.154	1.52967	0.764837	148.973
5	2	22	1	6	2	1	6	1	3	112.693	16.5157	26.6498	18.7624	44.8386	4.83401	2.67693	1.33846	228.309
5	1	28	1	6	2	1	13	2	3	90.3307	6.74856	35.2894	5.15515	56.7301	5.6142	1.68714	1.68714	203.242
6	1	47	3	5	2	1	12	2	3	41.3619	7.86348	30.5935	6.54892	43.6435	3.24243	1.33846	1.33846	135.931
2	1	45	3	5	2	1	13	2	3	113.27	19.097	34.5372	6.38161	21.3676	4.905	3.25056	1.62528	204.434
2	1	45	3	5	2	1	12	2	3	167.34	10.1102	11.2335	4.0871	23.3036	3.66835	1.91209	0.956046	222.611
2	1	48	3	5	2	2	9	2	3	48.0737	13.005	54.1291	44.0063	51.6921	8.51022	2.8119	2.8119	225.04
2	1	78	6	5	2	2	4	1	3	189.056	30.72	3.51488	7.66243	89.6293	10.628	4.31158	4.52247	340.045
5	2	84	7	4	2	2	20	3	3	148.791	7.7093	47.8258	5.17858	84.4508	2.84541	1.31222	0.65611	298.769
5	2	70	6	4	2	1	4	1	3	57.946	6.30991	16.8742	9.41706	41.4924	5.09525	1.14726	0.788738	139.071
5	2	70	6	4	2	1	14	2	3	85.2889	12.3569	22.8256	17.8542	45.5795	8.53702	2.29451	1.14726	195.884
5	2	70	6	4	2	1	9	2	3	88.9945	11.7355	22.0608	19.5751	36.2342	8.66704	2.1033	1.26676	190.637
5	2	70	6	4	2	1	15	3	3	117.587	14.6036	24.4987	23.2319	23.9012	7.85058	2.48572	1.38627	215.545
5	2	70	6	4	2	1	11	2	3	184.205	20.7223	28.2034	47.1331	93.6208	11.7933	3.05935	2.19891	390.936
5	2	79	6	4	2	2	18	3	3	73.58	9.91195	22.1437	18.8632	32.8992	6.25086	1.68714	1.05446	166.391
5	2	79	6	4	2	2	19	3	3	179.585	10.1228	31.9854	8.15451	78.8738	6.58172	1.68714	1.33565	318.326
5	2	81	7	4	2	1	14	2	3	151.896	15.1772	31.2149	31.7168	64.0073	12.8985	2.48572	3.56127	312.958
5	2	81	7	4	2	1	28	4	3	17.1355	5.68848	27.8449	4.58902	35.0152	2.67645	0.956046	0.956046	94.8616
5	2	81	7	4	1	1	1	1	3	65.01	7.86348	4.44562	10.1341	23.5426	2.6645	1.52967	0.764837	115.955
5	2	84	7	4	2	2	12	2	3	28.8478	4.40531	0.351488	8.69346	20.6206	3.41599	0.9373	0.46865	67.7406
5	2	84	7	4	2	1	11	2	3	74.0997	9.91195	29.1735	23.4325	93.6129	8.97535	1.8746	0.9373	242.018
5	2	74	6	4	2	1	10	2	3	101.935	10.1102	31.669	36.999	64.6287	6.54246	1.72088	0.860442	254.465
3	2	69	5	4	2	1	19	3	3	25.8646	6.74013	17.3283	3.32226	30.6891	2.40804	1.33846	0.669232	88.3602
3	2	70	6	4	2	1	24	4	3	170.905	20.2921	31.9319	27.4624	77.5593	11.528	3.63298	2.0316	345.343
2	2	48	3	4	2	1	7	1	3	93.5984	13.1456	53.204	20.6267	54.7576	8.90796	2.29451	1.14726	247.682
2	2	49	3	4	2	1	15	3	3	123.687	7.86348	0	5.56897	19.0014	3.70922	1.52967	0.764837	162.125
2	2	79	6	4	2	2	5	1	3	260.194	23.6903	34.5864	14.0829	86.0442	236.992	3.18682	3.28055	662.057
2	2	82	7	4	2	2	11	2	3	96.8993	10.7555	3.39771	46.1152	35.1253	24.5221	1.68714	0.84357	219.346
2	2	64	5	4	2	1	12	2	3	358.256	24.8094	43.8586	105.261	110.017	62.5006	4.01539	5.35386	714.071
2	2	66	5	4	2	2	10	2	3	63.384	9.91195	45.2247	11.9037	29.8296	5.46376	1.68714	0.84357	168.248
2	2	70	6	4	2	1	9	2	3	63.8046	12.3569	9.32145	23.7578	44.9103	5.9686	2.1033	1.19506	163.418
2	2	70	6	4	2	1	10	2	3	77.9582	15.3923	33.9396	6.02309	58.1276	12.4114	2.67693	1.33846	207.868
2	2	69	5	4	2	1	9	2	3	162.425	9.56046	35.7322	7.98299	71.584	12.8813	1.52967	1.05165	302.747
2	2	62	5	4	2	2	10	2	3	125.329	16.2622	26.5959	34.6332	66.2671	5.72433	2.8119	2.8119	280.435
2	2	78	6	4	2	2	12	2	3	150.59	13.2628	10.6618	35.1253	29.7593	26.2547	2.43698	3.42115	271.512
5	1	84	7	4	1	2	7	1	3	135.402	9.85275	40.6603	23.029	84.0548	16.7013	2.07426	3.11139	314.886
5	1	74	6	4	2	1	10	2	3	224.432	29.8047	2.86814	138.197	9.79948	70.2783	4.78023	5.56897	485.728
5	1	69	5	4	2	1	7	1	3	75.1472	19.097	19.8619	13.8388	23.5426	6.65002	3.25056	1.62528	163.013
5	1	70	6	4	1	1	25	4	3	91.676	9.05854	29.0638	14.4602	31.7168	5.02641	1.72088	0.860442	183.583
5	1	79	6	4	2	2	13	2	3	62.9894	11.107	23.784	19.8708	37.3749	6.93907	2.24952	1.12476	165.439
5	1	63	5	4	2	1	3	1	3	105.961	8.00689	27.0083	15.6314	46.44	9.76458	1.91209	0.956046	215.68
5	1	82	7	4	3	2	1	1	3	44.2303	2.99936	9.02152	4.28815	26.0101	2.61975	0.74984	0.585813	90.5048
5	1	57	4	4	2	2	4	1	3	52.1048	9.9706	21.8033	15.1563	25.4569	6.1575	1.88569	0.942847	133.478
2	1	84	7	4	2	2	4	1	3	95.8045	9.98225	50.0284	13.8017	25.3305	9.23827	1.8746	0.9373	206.998
2	1	86	7	4	2	2	5	1	3	29.648	3.44458	0	1.10133	8.08422	1.43641	0.74984	0.515515	44.9799
2	1	78	6	4	2	2	7	1	3	133.582	19.7067	3.16339	65.1189	30.2279	29.3162	3.18682	2.08549	286.388
2	1	69	5	4	2	2	12	2	3	73.4026	8.81062	31.7511	3.11652	63.6427	4.13678	1.49968	0.74984	187.11
2	1	74	6	4	2	2	10	2	3	65.8702	12.1146	17.4572	11.3882	33.7428	4.58738	2.24952	1.12476	148.535
1	2	70	6	3	2	1	13	2	3	126.129	16.4918	20.794	15.6075	62.884	7.0941	3.05935	1.52967	253.59
5	1	45	3	3	1	2	4	1	3	472.694	18.5585	19.8005	247.049	75.9448	64.4589	3.37428	9.56046	911.44
5	1	48	3	3	1	2	9	2	3	30.2338	9.91195	11.1539	11.0601	35.594	3.98353	1.68714	0.84357	104.468
5	2	28	1	2	1	2	12	2	3	111.98	15.981	25.4477	8.59973	57.0582	8.06688	2.62444	1.31222	231.07
5	2	39	2	2	2	2	8	2	3	173.669	18.3242	56.4958	19.777	37.0702	9.1347	3.18682	3.09309	320.751
5	1	41	3	2	2	2	8	2	3	0	2.67131	1.64028	0.9373	2.8119	1.34409	0.37492	0.18746	9.96725
5	1	42	3	2	1	1	15	3	3	98.888	9.98225	28.4002	11.7163	41.1709	5.42181	1.8746	0.9373	198.391
5	1	52	4	2	2	2	2	1	3	65.7647	6.20962	8.67003	13.7783	28.6111	6.04184	1.49968	1.49968	132.075
5	1	52	4	2	2	2	6	1	3	67.8158	6.74856	21.4407	12.6067	20.5269	6.64148	1.68714	1.68714	139.154
2	1	20	1	2	2	2	9	2	3	103.197	13.2159	20.6206	8.48257	21.6751	4.18317	2.43698	1.12476	174.936
2	1	41	3	2	2	2	12	2	3	193.893	19.6833	2.10893	150.109	24.1355	29.7537	3.93666	4.21785	427.837
2	1	43	3	2	2	2	11	2	3	169.345	12.1146	12.4192	2.71817	41.9442	3.06919	2.06206	1.03103	244.703
2	1	46	3	2	2	1	15	3	3	19.1539	5.35386	21.6305	6.45331	48.854	2.40254	1.33846	0.669232	105.856
2	1	45	3	2	2	2	11	2	3	209.138	24.0418	14.6453	8.95122	25.682	5.89	3.37428	3.37428	295.097
2	1	49	3	2	2	2	13	2	3	33.0832	8.81062	41.4755	7.33438	36.2032	3.13058	1.49968	1.59341	133.131
2	1	32	2	2	2	2	10	2	3	256.355	19.9411	20.9721	251.782	93.402	224.527	2.99936	3.42115	873.4
2	1	37	2	2	2	2	7	1	3	95.1618	11.0133	9.95882	4.12412	43.3736	8.84671	1.8746	2.08549	176.438
5	2	69	5	1	2	1	7	1	3	62.4745	10.7555	20.9135	36.4493	58.7012	6.80586	1.91209	0.956046	198.968
2	2	66	5	1	2	2	12	2	3	95.4509	17.9024	25.3071	22.8701	24.8385	9.83626	3.18682	1.59341	200.986
5	1	44	3	1	2	2	21	3	3	102.532	10.3337	6.91259	79.8111	48.9974	2.87939	1.68714	1.68714	254.84
5	1	31	2	1	2	2	9	2	3	111.358	8.81062	26.7131	7.84989	10.4275	3.00077	1.49968	0.74984	170.409
5	1	42	3	1	2	2	10	2	3	123.499	8.15451	15.2546	14.6688	13.1222	2.31537	1.12476	0.56238	178.702
5	1	43	3	1	2	2	16	3	3	37.8601	4.40531	10.4275	2.15579	34.0006	2.58836	0.74984	0.37492	92.5624
5	1	45	3	1	2	2	10	2	3	89.5298	8.81062	1.17163	8.08422	44.428	3.13222	1.68714	0.84357	157.687
5	1	45	3	1	2	1	5	1	3	117.708	17.9737	3.46567	12.8827	71.2494	7.48393	3.05935	3.05935	236.882
5	1	45	3	1	2	2	6	1	3	329.957	32.3369	30.9309	301.201	48.435	29.1894	4.31158	6.46737	782.83
5	1	48	3	1	2	1	12	2	3	309.267	35.1488	2.57758	156.599	0	107.17	5.6238	6.46737	622.854
5	1	58	4	1	2	2	27	4	3	355.609	38.7339	54.0822	78.0537	70.0163	34.106	5.43634	5.85813	641.895
5	1	69	5	1	2	2	16	3	3	59.2627	14.3173	16.4028	15.5123	28.2362	4.30666	2.62444	1.31222	141.975
5	1	45	3	1	2	1	5	1	3	125.766	15.3923	33.8799	12.2374	62.3103	11.4028	2.67693	3.53737	267.203
5	1	49	3	1	2	2	19	3	3	100.971	14.3173	1.17163	12.3255	22.3077	6.21711	2.43698	1.21849	160.966
5	1	50	4	1	2	1	5	1	3	49.9859	6.88353	8.60442	11.9745	46.5595	4.37893	1.91209	0.956046	131.255
5	1	48	3	1	2	1	7	1	3	68.8459	4.78023	3.22666	15.4162	32.6251	7.79704	0.956046	0.478023	134.125
2	1	32	2	1	2	2	8	2	3	220.954	13.005	83.0097	12.8879	23.3153	5.60248	2.8119	1.49968	363.086
2	1	28	1	1	2	1	5	1	3	120.657	15.727	25.4547	17.9259	25.8372	7.04033	2.86814	1.43407	216.945
2	1	43	3	1	2	1	14	2	3	99.8002	14.3407	26.4108	14.7948	30.952	5.99656	2.48572	1.24286	196.024
2	1	48	3	1	2	2	11	2	3	113.43	16.0278	59.8701	21.511	49.9347	6.64335	2.24952	1.12476	270.791
2	1	47	3	1	2	2	2	1	3	54.0075	8.81062	40.093	4.31158	56.5895	2.73153	1.49968	0.74984	168.793
2	1	50	4	1	2	1	3	1	3	195.26	25.7176	52.9411	75.5516	132.675	19.3246	4.2066	5.30606	510.982

## Sheet: patients with chronic complica 
Type of medical insurance	Gender	Age	Age group	Occupation	Mode of Admission	Year of admission	LOS	LOS value	Type of chronic complications	Drugs	Accommodation	Imaging	Therapeutics	Labo analysis	Sanitary materials	Diagnostics	Nursing care	Total costs
5	2	85	7	5	2	2	26	4	0	49.5914	6.60797	2.34325	2.31982	48.2944	3.37428	1.12476	1.05446	114.71
5	2	81	7	5	2	2	14	2	0	57.1069	5.99872	6.91259	7.7093	27.8847	2.58203	1.68714	0.84357	110.725
5	2	84	7	5	2	2	23	4	0	70.4044	8.81062	11.8334	12.8879	18.2774	7.56355	1.68714	1.12476	132.589
5	2	85	7	5	2	2	24	4	0	108.485	32.9996	23.4533	10.8899	25.4804	7.84778	2.63997	1.31999	213.116
5	2	85	7	5	2	2	25	4	0	522.431	24.0897	31.1139	96.2175	58.4329	26.1923	4.14852	21.4262	784.052
2	2	53	4	5	2	1	5	1	0	49.9539	7.86348	8.65222	4.82803	10.5882	2.25627	1.33846	0.669232	86.1498
5	1	54	4	5	2	1	14	2	0	28.456	5.61677	0	5.66457	21.6545	1.23497	0.956046	0.478023	64.0608
5	1	54	4	5	2	1	11	2	0	3.66453	6.88353	27.8449	2.31841	24.6182	2.95801	1.72088	0.860442	70.8689
5	1	80	7	5	2	2	2	1	0	18.6542	1.33565	45.9277	8.59973	39.7415	1.5981	0.18746	0.09373	116.138
5	1	84	7	5	2	2	26	4	0	40.2334	5.75136	0	2.40426	18.9041	4.03727	0.942847	0.542137	72.8153
5	1	40	3	5	3	1	1	1	0	56.8403	4.2066	22.9451	26.2196	34.1787	5.86678	1.52967	0.764837	152.552
5	1	84	7	5	2	2	26	4	0	69.6278	8.81062	1.17163	9.70106	47.568	5.09235	1.68714	0.84357	144.502
5	1	84	7	5	2	2	27	4	0	436.752	36.276	47.4959	120.92	74.037	20.8911	5.09137	5.09137	746.554
2	1	53	4	5	2	1	5	1	0	6.82545	2.24671	9.94288	0.812639	0.717035	0.0630991	0.382419	0.191209	21.1814
2	1	53	4	5	2	1	9	2	0	43.176	8.222	20.0053	1.60138	7.64837	4.81752	1.33846	1.43407	88.2431
2	1	53	4	5	2	2	4	1	0	93.6775	6.36421	18.6684	28.4975	48.8395	13.2593	1.13142	1.34356	211.781
2	1	53	4	5	2	1	8	2	0	326.579	13.1934	24.2597	9.82338	27.5102	13.1385	3.44177	1.72088	419.667
2	1	53	4	5	2	1	6	1	0	77.0492	14.6036	17.7108	8.38931	47.6589	8.79587	2.48572	1.24286	177.936
2	1	43	3	5	2	2	13	2	0	0	29.525	18.8632	1.47625	65.4236	0.272754	0.56238	0.56238	116.685
2	1	50	4	5	2	1	10	2	0	19.8317	4.49342	15.6075	1.50577	21.5349	3.17503	0.764837	0.382419	67.2956
2	1	51	4	5	2	1	11	2	0	24.4202	1.19506	4.40531	2.8822	6.02216	1.86429	0.56238	0.28119	41.6328
5	2	54	4	4	2	1	16	3	0	65.6436	3.82419	0	16.3006	23.8773	23.7926	0.956046	0.693134	135.087
5	2	84	7	4	2	2	23	4	0	4.6783	3.30398	7.14692	2.0152	34.563	2.41683	0.56238	0.421785	55.1083
5	2	81	7	4	2	2	17	3	0	7.81856	2.35712	0	0	69.6528	0.188805	0.188569	0.188569	80.3944
5	2	81	7	4	2	2	20	3	0	15.0758	5.34261	39.3666	0.140595	48.5053	0.707662	0.74984	1.12476	111.013
5	2	81	7	4	2	2	14	2	0	22.214	0	0	0	0	6.36427	0	0	28.5783
5	2	81	7	4	2	2	14	2	0	22.7108	1.33565	0	0.702975	0	2.4801	0.18746	0.37492	27.7919
5	2	81	7	4	2	2	14	2	0	22.8779	1.33565	2.46041	0.328055	14.8796	5.11063	0.18746	0.18746	47.3672
5	2	76	6	4	2	2	9	2	0	26.2147	2.20266	9.95882	3.02279	28.8689	2.22304	0.56238	0.28119	73.3344
5	2	81	7	4	2	2	16	3	0	27.8163	3.98353	3.98353	7.7093	21.3236	1.87882	0.37492	0.585813	67.6557
5	2	90	8	4	2	1	23	4	0	44.0558	7.86348	11.8311	2.0555	54.7576	2.17596	1.33846	0.669232	124.747
5	2	81	7	4	2	2	17	3	0	53.5864	13.2159	11.5054	9.70106	34.2115	5.49516	2.43698	1.21849	131.371
5	2	81	7	4	2	2	14	2	0	55.1313	129.641	68.9457	5.9635	111.256	5.96963	2.07426	2.07426	381.056
5	2	84	7	4	2	2	23	4	0	57.4052	7.35781	7.02975	11.3179	20.5034	6.73263	1.31222	0.65611	112.315
5	2	81	7	4	2	2	18	3	0	58.8653	9.91195	21.1127	8.34197	25.8929	5.40729	1.68714	0.84357	132.063
5	2	85	7	4	2	1	23	4	0	61.273	6.74013	0	9.22585	31.5734	4.27257	1.33846	1.17116	115.595
5	2	54	4	4	2	1	15	3	0	65.1199	11.0133	37.7732	18.4883	19.3084	4.18341	2.06206	1.03103	158.98
5	2	90	8	4	2	1	22	4	0	68.2022	10.1102	18.0693	10.8511	38.9828	3.37771	1.91209	0.956046	152.461
5	2	78	6	4	2	2	15	3	0	69.703	7.99049	14.8796	11.6928	28.4002	6.76356	1.49968	0.74984	141.679
5	2	88	7	4	2	2	11	2	0	69.842	7.7093	1.0779	8.10765	23.1748	3.21916	1.49968	0.74984	115.38
5	2	92	8	4	2	2	15	3	0	70.4142	8.01392	13.0285	54.1291	49.3254	1.67003	1.68714	1.68714	199.955
5	2	73	6	4	2	2	23	4	0	70.75	9.20898	18.2774	12.9347	40.4445	6.01466	1.68714	0.84357	160.161
5	2	84	7	4	2	2	18	3	0	71.2414	16.0278	40.3039	10.5212	68.751	15.697	2.24952	1.12476	225.917
5	2	92	8	4	2	2	16	3	0	71.9362	11.0133	25.682	15.6295	50.6377	7.06209	1.8746	1.8746	185.71
5	2	92	8	4	2	2	17	3	0	73.2146	13.3565	7.84989	47.4508	22.8233	7.60197	1.8746	0.9373	175.109
5	2	81	7	4	2	2	15	3	0	74.1733	1.34356	2.82854	0.259283	0	0	0.188569	0.188569	78.9818
5	2	85	7	4	2	1	18	3	0	77.1448	14.6036	22.8256	6.33381	23.9251	10.0514	2.48572	1.24286	158.613
5	2	85	7	4	2	1	25	4	0	88.044	7.86348	12.6676	3.89589	55.9526	3.22713	1.52967	0.764837	173.945
5	2	85	7	4	2	1	15	3	0	90.0263	12.1146	5.50664	5.83469	40.9132	3.70819	2.24952	1.12476	161.478
5	2	90	8	4	2	1	8	2	0	92.6681	16.3484	81.2878	60.8285	58.3427	5.66744	2.29451	2.29451	319.732
5	2	91	8	4	2	2	21	3	0	99.7674	13.0519	18.6523	13.3331	82.0372	18.5407	2.99936	2.99936	251.381
5	2	83	7	4	2	1	23	4	0	103.563	15.727	16.3723	9.27365	43.7391	4.36196	2.86814	1.43407	197.339
5	2	81	7	4	2	2	17	3	0	107.525	17.6212	20.6206	6.86573	22.9639	4.23285	2.99936	2.99936	185.828
5	2	83	7	4	2	1	19	3	0	126.558	16.8503	11.5921	31.8124	14.2451	8.23084	3.05935	1.52967	213.878
5	2	81	7	4	2	2	19	3	0	133.847	28.0487	23.3388	31.9385	75.4995	10.8781	3.93666	1.40595	308.893
5	2	81	7	4	2	2	17	3	0	181.818	30.5718	30.8782	5.84565	59.0693	7.3403	4.14852	2.07426	321.746
2	2	77	6	4	2	2	18	3	0	21.0358	2.67131	3.51488	6.04559	20.2691	2.99397	0.18746	0.74984	57.468
2	2	74	6	4	2	1	24	4	0	30.2938	5.61677	15.8943	8.03079	17.5196	4.82182	0.956046	0.62143	83.7544
2	2	85	7	4	2	1	25	4	0	37.3632	5.61677	16.3723	6.88353	19.4555	2.49193	1.14726	0.573628	89.9042
2	2	76	6	4	2	1	10	2	0	45.5198	5.61677	15.6792	2.72473	29.494	2.02777	1.14726	0.573628	102.783
2	2	85	7	4	2	1	6	1	0	61.3029	6.74013	28.3229	8.3176	35.7561	3.0235	1.33846	0.669232	145.471
2	2	78	6	4	2	2	3	1	0	76.9355	9.27927	16.5434	12.8879	34.563	6.81745	0.56238	0.74984	158.339
2	2	74	6	4	2	1	26	4	0	129.432	10.7794	0	9.79948	5.85578	4.11817	2.67693	1.33846	164.001
5	1	91	8	4	2	2	24	4	0	0	11.9506	0	10.3103	0	24.8366	2.8119	1.40595	51.3153
5	1	81	7	4	2	2	16	3	0	0	37.492	0	0.0702975	2.46041	0.0810765	0.37492	0.37492	40.8536
5	1	87	7	4	2	1	5	1	0	5.17788	2.99936	14.411	3.63204	20.7612	2.4105	0.74984	0.37492	50.5167
5	1	84	7	4	3	1	23	4	0	9.87883	4.0871	3.94369	5.99919	29.9004	0.699348	0.573628	0.286814	55.3689
5	1	87	7	4	2	2	15	3	0	10.665	2.26283	60.6957	0.424281	15.1798	1.82394	0.565708	0.282854	91.9002
5	1	91	8	4	2	1	28	4	0	20.1047	0	0	0.669232	0	1.37814	0.191209	0.0956046	22.4389
5	1	87	7	4	2	1	16	3	0	23.8988	2.39012	0	0	0	0	0.191209	0.0956046	26.5757
5	1	86	7	4	2	2	18	3	0	25.0095	2.34325	0	0.984165	0	6.36427	0.18746	0.18746	35.0761
5	1	81	7	4	2	2	10	2	0	25.3767	0.890435	0	0.702975	0	1.24005	0.18746	0.37492	28.7725
5	1	87	7	4	2	1	13	2	0	27.7673	5.50664	24.0183	7.68586	39.8587	3.94182	1.12476	0.702975	110.606
5	1	66	5	4	2	1	22	4	0	28.6804	6.74013	20.9135	1.12335	46.0336	2.00483	1.14726	0.573628	107.217
5	1	89	7	4	2	1	25	4	0	29.5861	4.49342	16.4918	3.77638	29.2789	1.80215	0.956046	0.478023	86.8628
5	1	88	7	4	2	2	22	4	0	30.9642	16.5199	45.8106	55.8162	44.428	8.28011	2.8119	1.40595	206.037
5	1	80	7	4	2	2	13	2	0	35.0539	9.373	4.80366	8.03735	57.0347	5.58865	1.49968	1.56998	122.961
5	1	86	7	4	2	2	19	3	0	35.7932	2.34325	0	0.702975	0	1.24005	0.18746	0.37492	40.6418
5	1	81	7	4	2	2	18	3	0	36.4832	1.33565	0	0.960733	0.351488	0.0684229	0.18746	0.09373	39.4807
5	1	85	7	4	2	2	17	3	0	50.2841	8.81062	38.195	17.1526	39.0386	8.36119	1.68714	0.84357	164.373
5	1	82	7	4	2	1	11	2	0	52.0546	7.93519	23.1841	5.32996	32.6968	4.87058	1.33846	1.55358	128.963
5	1	82	7	4	2	1	28	4	0	53.8546	7.86348	21.6305	2.24671	38.5287	3.23335	1.33846	0.669232	129.365
5	1	87	7	4	2	1	19	3	0	58.2242	5.50664	15.3483	7.26408	22.4952	4.42734	0.9373	0.46865	114.672
5	1	54	4	4	2	2	15	3	0	66.5537	15.4186	16.4028	4.38188	21.5813	8.99293	2.62444	1.40595	137.362
5	1	66	5	4	2	1	26	4	0	68.6797	6.74013	12.4286	2.53352	29.7569	4.83329	1.14726	0.573628	126.693
5	1	83	7	4	2	2	26	4	0	70.2326	13.2159	2.34325	7.92019	31.5167	7.02272	2.24952	2.24952	136.75
5	1	86	7	4	2	2	27	4	0	71.8082	6.06902	27.2989	13.0988	25.5414	4.30197	1.68714	0.84357	150.649
5	1	91	8	4	2	1	23	4	0	73.2253	0.860442	5.49727	9.99068	14.1495	4.41693	0.573628	0.286814	109.001
5	1	84	7	4	2	1	26	4	0	73.2893	8.98684	13.289	8.55662	37.3097	3.17168	1.52967	0.764837	146.898
5	1	75	6	4	2	2	12	2	0	74.9934	12.6067	16.0513	41.8036	54.7618	7.91339	2.06206	1.03103	211.223
5	1	55	4	4	2	1	17	3	0	85.5322	12.6437	30.9759	4.66073	60.1114	7.52193	2.1033	2.67693	206.226
5	1	87	7	4	2	1	27	4	0	86.7586	12.3569	59.9919	3.15495	31.9319	3.52494	2.29451	1.14726	201.161
5	1	86	7	4	2	2	16	3	0	87.6437	11.0133	26.8302	14.9265	29.0563	6.79918	1.8746	0.9373	179.081
5	1	86	7	4	2	2	15	3	0	89.2317	20.0348	11.8334	231.841	29.8999	8.21684	2.8119	1.31222	395.182
5	1	81	7	4	2	2	20	3	0	89.7676	11.0133	4.56934	13.1456	24.0183	5.97974	1.8746	1.8746	152.243
5	1	84	7	4	3	1	14	2	0	90.354	21.511	18.9775	6.35771	45.2688	3.24769	1.91209	0.956046	188.585
5	1	67	5	4	2	2	7	1	0	91.3847	6.74856	11.5991	17.2229	32.3134	5.82087	1.8746	0.9373	167.901
5	1	82	7	4	2	1	3	1	0	91.6103	16.6352	15.1772	6.76403	68.0466	6.49036	1.72088	1.79259	208.237
5	1	72	6	4	2	2	9	2	0	95.5198	10.404	13.9423	6.49081	31.8916	7.84005	2.24952	1.12476	169.463
5	1	91	8	4	2	1	21	3	0	97.0662	11.2335	8.1503	12.1179	43.7391	4.75872	1.91209	0.956046	179.934
5	1	84	7	4	2	1	15	3	0	99.8383	26.9605	45.8424	8.98684	45.1971	8.42946	4.58902	2.29451	242.138
5	1	82	7	4	2	1	15	3	0	104.462	52.5826	23.7817	109.372	73.0658	9.61663	4.2066	2.1033	379.19
5	1	83	7	4	2	1	27	4	0	126.111	11.2335	6.0948	7.81568	35.7322	2.55336	1.91209	0.956046	192.409
5	1	81	7	4	2	2	22	4	0	132.511	0	0	0	0	0.957687	0.18746	0	133.656
5	1	81	7	4	2	1	1	1	0	143.733	18.5473	20.9135	11.4009	63.7205	9.63575	3.25056	1.62528	272.827
5	1	84	7	4	4	1	4	1	0	152.249	19.6707	40.8949	31.191	48.7584	11.6685	3.44177	1.72088	309.596
5	1	91	8	4	2	1	29	5	0	155.236	19.097	23.0646	4.73243	44.1454	7.04893	3.44177	1.72088	258.487
5	1	91	8	4	2	1	27	4	0	173.698	25.8372	26.4108	13.6954	61.5694	13.8804	4.58902	2.29451	321.974
5	1	84	7	4	2	1	13	2	0	496.049	19.4555	41.4685	366.094	57.3867	35.3524	4.2066	4.2066	1024.22
4	1	82	7	4	2	1	22	4	0	0	1.36237	1.31456	1.9599	55.6897	0.128827	0	0.191209	60.6466
4	1	81	7	4	2	2	12	2	0	1.58263	4.10069	5.85813	1.38252	13.3331	0.591437	0.9373	0.46865	28.2545
4	1	88	7	4	2	2	21	3	0	16.4079	3.7492	0.9373	2.78847	57.1753	0.270645	1.31222	0.65611	83.2972
4	1	85	7	4	2	1	22	4	0	28.9969	0.908244	0	5.28216	17.2088	0.337484	0.191209	0.382419	53.3072
4	1	66	5	4	2	1	16	3	0	31.4907	4.49342	23.0646	2.84424	31.8124	2.10856	0.956046	0.478023	97.2481
4	1	85	7	4	2	1	8	2	0	42.3839	14.4124	9.56046	1.67308	0	0.774398	0.191209	0.191209	69.1867
4	1	91	8	4	2	1	19	3	0	339.815	24.4748	54.1361	26.2913	93.9077	34.084	4.39781	2.19891	579.306
2	1	66	5	4	2	2	8	2	0	0	2.34325	1.68714	1.40595	0	0	0.74984	0	6.18618
2	1	50	4	4	2	1	8	2	0	16.254	4.56512	3.27446	3.99149	25.4308	0.0917805	0.764837	0.382419	54.7549
2	1	66	5	4	2	1	7	1	0	33.9275	6.60797	6.7017	3.13996	2.46041	0.0323369	1.12476	0.56238	54.557
2	1	54	4	4	2	1	10	2	0	35.6301	6.93602	26.0101	50.4736	68.1886	12.8396	1.49968	1.49968	203.077
2	1	51	4	4	2	1	14	2	0	57.9345	7.17035	19.0014	13.5759	33.366	3.76515	1.33846	0.669232	136.821
2	1	67	5	4	2	2	6	1	0	60.7832	9.9706	28.7804	15.6041	25.3861	4.43185	1.69712	0.848562	147.502
2	1	78	6	4	2	2	15	3	0	83.102	7.7093	11.3648	10.076	28.4002	5.36651	1.49968	0.74984	148.268
2	1	80	7	4	2	1	21	3	0	137.545	14.6036	21.6305	36.9751	32.6251	8.66823	2.67693	1.33846	256.063
2	2	53	4	2	2	2	6	1	0	0	1.59341	6.51424	0	0	0	0.74984	0.37492	9.23241
2	2	54	4	2	2	1	9	2	0	8.23161	7.7093	20.6206	8.67003	40.4445	2.78074	1.31222	1.31222	91.0812
2	2	48	3	2	2	2	4	1	0	57.74	7.7093	28.4705	7.28751	44.1468	1.64567	1.31222	0.65611	148.968
2	2	51	4	2	2	1	13	2	0	73.6354	9.56046	21.272	2.29451	54.9966	3.19535	1.72088	0.860442	167.536
2	1	59	4	2	2	1	6	1	0	64.6598	3.34616	1.07555	8.2698	0	12.4097	0.764837	0.478023	91.0039
5	2	53	4	1	2	2	8	2	0	3.27094	1.10133	1.05446	0	0.351488	0	0.18746	0.09373	6.05941
5	2	85	7	1	2	1	13	2	0	6.80527	2.20266	32.4775	0.585813	52.934	0.9373	0.37492	0.18746	96.5049
5	2	86	7	1	2	2	15	3	0	17.8204	0.890435	0	0.9373	0	6.36427	0.18746	0.37492	26.5748
5	2	86	7	1	2	2	19	3	0	46.805	14.3173	24.2526	9.5136	18.043	6.80949	2.43698	1.21849	123.397
5	2	86	7	1	2	2	15	3	0	48.0448	6.60797	12.0912	9.72449	21.3236	3.27071	1.31222	0.65611	103.031
5	2	86	7	1	2	2	17	3	0	50.1992	6.60797	27.5566	2.48385	37.7263	2.65725	1.12476	0.56238	128.918
5	2	85	7	1	2	1	17	3	0	51.6481	2.99936	15.5826	1.35909	37.9841	1.96411	0.9373	0.46865	112.943
5	2	85	7	1	2	1	18	3	0	80.2491	8.81062	16.0513	10.5446	30.4623	4.74461	1.68714	0.84357	153.393
5	2	50	4	1	2	2	1	1	0	81.4938	9.91195	19.5661	6.81886	14.6922	4.58668	1.68714	0.84357	139.6
5	2	91	8	1	2	2	7	1	0	131.436	18.7226	15.5826	24.7916	54.1525	8.89615	3.18682	3.18682	259.956
4	2	87	7	1	2	1	13	2	0	81.7836	2.39012	0	0	0	0	0.191209	0.0956046	84.4605
2	2	54	4	1	2	2	10	2	0	37.4381	6.60797	5.6238	6.23305	31.0481	1.7415	1.31222	0.65611	90.6608
5	1	85	7	1	2	2	22	4	0	0	5.34261	22.2609	0.492083	66.1031	0.994944	0.74984	0.37492	96.3184
5	1	54	4	1	1	2	24	4	0	4.90044	5.50664	22.2609	1.96833	27.1583	1.83008	0.9373	0.46865	65.0306
5	1	57	4	1	2	1	13	2	0	9.19645	4.49342	10.0385	2.84424	5.78408	0.632903	0.764837	0.382419	34.1368
5	1	82	7	1	2	2	25	4	0	33.7784	6.74856	35.5003	2.69474	31.6339	1.69792	1.68714	0.84357	114.585
5	1	44	3	1	2	2	3	1	0	36.602	5.34261	16.9886	2.8119	47.5914	1.95802	0.9373	0.46865	112.701
5	1	45	3	1	2	2	5	1	0	37.5963	18.6991	13.4971	11.6694	46.6541	2.0869	2.62444	1.31222	134.14
5	1	55	4	1	2	2	14	2	0	63.1778	7.7093	7.17035	2.78847	32.4306	3.01623	1.49968	0.74984	118.542
5	1	52	4	1	2	1	5	1	0	67.4651	19.1209	7.88738	8.222	28.2034	3.31963	1.52967	1.52967	137.278
5	1	86	7	1	2	2	18	3	0	69.4458	15.4186	22.6124	6.13932	34.6801	2.69802	2.8119	1.40595	155.212
5	1	81	7	1	2	2	22	4	0	74.9231	8.81062	24.2526	7.54527	25.2837	4.82147	1.49968	0.74984	147.886
5	1	42	3	1	2	1	12	2	0	81.8964	8.98684	14.4841	3.96759	45.7946	3.68699	1.52967	0.764837	161.111
5	1	86	7	1	2	2	16	3	0	96.6111	2.34325	0	0	0	2.23054	0.18746	0.09373	101.466
5	1	92	8	1	2	2	18	3	0	106.587	7.4984	13.708	3.42115	45.6934	4.05429	1.8746	2.22609	185.063
5	1	55	4	1	2	1	21	3	0	12.3488	2.24671	3.77638	1.69698	10.6121	0.903464	0.382419	0.382419	32.3493
4	1	87	7	1	2	2	24	4	0	0	0.890435	41.2412	3.96009	49.6769	14.0241	0.18746	0.37492	110.355
4	1	50	4	1	2	1	1	1	0	33.4982	6.74013	0	1.84039	0	0.124764	1.14726	0.573628	43.9244
4	1	83	7	1	2	2	17	3	0	89.112	13.2159	7.96705	17.5041	33.8365	8.62644	2.24952	1.12476	173.636
2	1	53	4	1	2	1	9	2	0	1.07412	3.37006	14.6514	1.9838	23.0407	0.0630991	0.573628	0.286814	45.0436
2	1	53	4	1	2	2	7	1	0	51.4451	7.7093	21.6751	12.5833	34.0006	5.91062	1.49968	0.74984	135.573
2	1	53	4	1	2	2	6	1	0	53.8559	4.33501	11.3648	3.35085	16.6605	1.58943	0.9373	0.46865	92.5624
2	1	83	7	1	2	2	10	2	0	47.254	9.91195	20.0348	22.4483	112.007	3.78927	1.68714	1.68714	218.82
2	1	38	2	1	2	2	5	1	0	75.9495	9.91195	26.2444	8.99808	39.6712	3.5355	1.68714	0.84357	166.841
1	1	45	3	1	2	1	3	1	0	87.8392	6.74013	8.96293	3.29836	72.5161	0.848491	1.14726	0.573628	181.926
2	2	65	5	4	2	1	7	1	1	88.3693	11.2335	36.3537	15.4162	46.1531	6.09551	2.1033	1.05165	206.776
5	2	65	5	3	2	2	6	1	1	120.592	11.0133	21.9328	8.31854	49.2317	6.17165	1.8746	0.9373	220.072
5	2	66	5	3	2	1	10	2	1	53.0288	5.97529	17.3283	2.22281	43.763	2.47927	0.956046	0.956046	126.71
5	1	66	5	5	2	1	13	2	1	76.2184	7.72007	15.6792	8.46101	23.5426	5.28502	2.1033	0.956046	139.966
5	2	66	5	5	2	1	7	1	1	56.9858	8.81062	15.6061	10.4509	30.3685	5.92936	1.68714	1.12476	130.963
2	1	66	5	4	2	2	6	1	1	57.9453	13.2159	15.3717	11.6225	28.7048	5.89046	2.24952	1.12476	136.125
2	1	67	5	4	2	1	15	3	1	75.3224	8.98684	21.6305	29.494	24.1402	6.52549	1.72088	0.860442	168.681
5	2	67	5	4	2	2	14	2	1	107.946	11.0133	27.791	30.6029	62.0024	6.27968	2.06206	1.03103	248.729
5	2	67	5	4	2	1	13	2	1	200.374	17.6212	13.4737	67.0404	42.53	14.4253	3.18682	1.59341	360.245
2	2	69	5	5	2	1	11	2	1	49.6327	9.56046	27.9883	11.1618	35.2781	5.49081	1.72088	0.860442	141.693
2	2	68	5	5	2	1	13	2	1	77.5738	11.2335	30.235	10.397	34.0592	4.65403	2.1033	1.05165	171.308
5	1	56	4	5	2	1	11	2	1	59.8184	8.98684	28.0122	10.8272	38.3614	5.26973	1.72088	0.860442	153.857
5	1	68	5	5	2	1	23	4	1	99.5493	9.75167	7.64837	10.1102	29.2789	3.54717	1.91209	0.956046	162.754
2	1	68	5	5	2	1	17	3	1	134.068	11.6638	43.285	18.3083	25.8372	12.7964	2.1033	1.05165	249.113
2	1	68	5	5	2	2	12	2	1	99.6329	11.0133	21.6751	14.5282	21.2533	5.2292	2.06206	1.03103	176.425
5	2	68	5	4	2	1	15	3	1	99.3681	13.4803	24.9767	25.6698	42.9504	8.03079	2.29451	1.14726	217.918
2	2	67	5	4	2	2	8	2	1	56.3967	7.7093	25.4243	8.36541	41.1241	4.65838	1.31222	0.65611	145.646
2	2	67	5	4	2	2	10	2	1	84.6549	9.9706	14.4963	5.60994	46.3409	7.74643	1.69712	0.848562	171.365
2	2	68	5	4	2	2	13	2	1	93.6197	19.8239	21.3236	24.1589	30.4623	11.0175	3.37428	1.68714	205.467
2	2	67	5	4	2	2	15	3	1	105.75	11.0133	19.7067	13.005	33.5554	6.79871	2.06206	0.9373	192.829
2	2	69	5	4	2	1	13	2	1	141.198	12.094	26.602	16.8264	39.4369	6.89405	2.67693	1.33846	247.067
1	2	67	5	4	2	2	7	1	1	43.4544	7.7093	16.0513	5.5535	26.3616	3.35366	1.49968	0.74984	104.733
2	1	56	4	4	2	1	7	1	1	84.4908	16.1333	28.8009	7.45716	26.3869	4.95614	2.86814	1.43407	172.527
2	1	70	6	5	2	1	11	2	1	106.453	10.1819	17.5674	10.8511	32.6251	3.74149	2.1033	1.05165	184.575
2	2	71	6	5	2	1	11	2	1	56.5174	8.98684	17.3522	11.9267	21.1764	3.32417	1.52967	0.764837	121.578
5	1	71	6	5	2	1	19	3	1	41.6203	6.74013	24.2597	4.49342	33.9157	2.66163	1.14726	0.573628	115.412
5	2	71	6	4	2	1	18	3	1	62.8586	7.86348	37.1424	9.96678	49.4993	4.54026	1.52967	0.764837	174.165
5	2	71	6	4	2	1	9	2	1	66.3814	8.98684	22.3715	12.333	27.7253	5.96812	1.72088	0.860442	146.348
5	2	70	6	4	2	1	9	2	1	95.0286	15.727	15.4401	9.13024	33.6767	5.39473	2.86814	1.43407	178.7
5	2	71	6	4	2	1	29	5	1	101.337	12.5003	25.5742	15.3684	47.2287	7.18182	2.29451	1.14726	212.632
3	2	70	6	4	2	2	20	3	1	62.801	9.27927	26.1507	13.005	23.784	4.7657	1.8746	0.9373	142.598
2	2	56	4	4	2	1	9	2	1	123.661	8.41321	29.8764	9.36925	25.3352	6.40742	2.29451	1.14726	206.505
5	1	70	6	4	2	2	11	2	1	252.035	25.3305	99.8225	100.174	77.8194	27.9198	4.31158	2.15579	589.569
2	1	71	6	4	3	1	8	2	1	33.2955	5.61677	32.0515	5.44946	60.7328	2.57726	1.14726	0.573628	141.444
6	1	70	6	3	2	2	7	1	1	45.6432	8.86276	27.3425	8.13205	35.2625	3.28959	1.69712	0.848562	131.078
5	2	71	6	5	2	2	7	1	1	125.26	12.092	16.9948	2.40426	55.6515	5.64199	1.69712	0.848562	220.591
3	2	72	6	5	2	1	14	2	1	57.32	6.74013	16.8503	7.07474	48.1608	8.02601	1.33846	0.669232	146.18
3	1	73	6	5	2	1	21	3	1	104.576	13.0739	11.1379	11.9984	31.5256	6.19088	2.1033	1.05165	181.658
2	1	56	4	5	2	1	20	3	1	61.0624	7.86348	23.8295	13.4803	26.9127	4.94228	1.33846	0.740936	140.17
1	2	72	6	5	2	1	9	2	1	160.91	18.1888	78.348	30.6652	76.9617	12.9955	3.25056	3.56127	384.881
5	2	73	6	4	2	2	7	1	1	27.2347	9.91195	12.1849	9.53703	40.2102	3.3068	1.68714	0.84357	104.916
5	2	71	6	4	2	2	11	2	1	47.0014	8.01392	12.3021	5.24888	22.4952	2.78191	1.12476	0.56238	99.5305
5	2	73	6	4	2	2	9	2	1	86.8294	8.81062	37.8904	26.7131	54.9727	4.5684	1.68714	0.84357	222.315
5	2	72	6	4	2	1	12	2	1	87.4363	6.74856	38.898	12.5833	44.8967	3.8516	1.8746	0.9373	197.226
5	2	73	6	4	2	2	17	3	1	98.6771	10.1228	17.2463	3.8898	48.2007	4.2769	1.68714	0.84357	184.944
5	2	72	6	4	2	2	13	2	1	111.389	13.2159	30.0873	13.4034	39.9524	5.39698	2.43698	1.21849	217.101
5	2	71	6	4	2	2	7	1	1	122.184	11.0133	27.6504	6.44394	28.5877	1.35252	1.8746	0.9373	200.044
5	2	72	6	4	2	1	18	3	1	135.542	16.8503	24.0207	13.791	79.6626	5.24774	3.05935	1.52967	279.703
5	2	73	6	4	2	1	13	2	1	202.248	20.2204	38.0745	12.5242	82.7458	11.3626	3.44177	2.36621	372.984
2	2	72	6	4	2	1	8	2	1	28.8977	7.86348	11.2335	11.7355	24.905	3.88155	1.52967	0.764837	90.8113
2	2	56	4	4	2	1	7	1	1	38.7521	6.74013	14.4841	9.01074	15.4162	2.18385	1.33846	0.669232	88.5949
2	2	71	6	4	2	2	8	2	1	123.559	20.9252	28.4705	4.19442	59.9872	5.38479	3.56174	1.78087	247.864
5	1	73	6	4	2	1	18	3	1	62.3349	13.4803	23.0646	13.7671	50.9334	5.93561	2.29451	1.14726	172.958
5	1	72	6	4	2	1	11	2	1	70.0278	9.75167	23.8056	7.45716	27.7253	3.58709	1.72088	0.860442	144.936
5	1	73	6	4	2	2	10	2	1	82.8227	14.0595	12.9113	30.1576	73.0157	7.8274	2.24952	1.75744	224.801
5	1	73	6	4	2	1	13	2	1	135.418	6.81183	42.7831	15.727	42.4485	3.76754	1.33846	1.05165	249.346
5	1	72	6	4	2	1	10	2	1	150.17	10.1102	37.8833	26.8888	25.8372	3.91549	1.91209	0.956046	257.673
2	1	71	6	4	2	2	8	2	1	87.8745	11.0133	42.4831	9.20898	54.9492	7.98346	2.06206	1.03103	216.606
2	1	72	6	4	2	1	5	1	1	159.513	21.3437	15.8943	17.1371	26.2913	8.6147	3.82419	1.91209	254.53
5	2	56	4	3	2	1	8	2	1	154.983	14.6036	23.0646	22.5388	45.9141	8.3666	2.67693	1.33846	273.486
5	1	71	6	1	2	2	8	2	1	79.6806	11.0133	16.9886	10.5915	16.2856	8.06828	2.06206	1.03103	145.721
2	1	55	4	5	2	1	14	2	1	62.0842	11.2335	26.7693	13.7432	33.3421	6.45379	2.1033	1.05165	156.781
2	1	56	4	5	2	1	4	1	1	85.0683	13.4803	33.2465	11.114	41.8509	5.14783	2.29451	1.14726	193.35
2	1	74	6	5	2	2	8	2	1	185.533	14.402	19.4462	3.5121	44.3138	5.77187	2.4514	2.00355	277.434
5	2	74	6	4	2	1	11	2	1	80.0053	8.98684	19.8619	8.00689	19.6946	4.74581	1.72088	0.860442	143.883
2	2	74	6	4	2	2	11	2	1	45.21	6.60797	24.7213	8.67003	42.9049	2.9853	1.31222	0.65611	133.068
2	2	74	6	4	2	1	23	4	1	77.1986	9.98225	60.8308	26.4319	33.4148	5.11133	1.68714	0.84357	215.5
5	1	75	6	4	2	1	12	2	1	73.58	10.1102	15.1772	8.1981	41.8509	3.68819	1.91209	0.956046	155.473
5	1	74	6	4	2	1	14	2	1	124.102	9.94288	43.0699	6.66842	28.4424	5.74464	2.67693	1.33846	221.986
5	1	75	6	4	2	1	13	2	1	214.998	28.7531	20.9135	12.2374	66.1106	10.7472	4.78023	2.39012	360.93
6	2	75	6	3	2	1	11	2	1	136.054	11.2335	94.553	8.1742	72.9463	5.33163	2.1033	1.05165	331.447
5	2	56	4	5	2	1	8	2	1	106.361	11.2335	15.4162	11.616	21.7501	5.06705	2.1033	1.05165	174.599
2	2	56	4	5	2	1	8	2	1	61.0558	5.61677	98.8074	2.77253	39.8193	3.31748	0.956046	0.478023	212.823
5	2	78	6	4	2	2	5	1	1	70.8582	9.9706	27.2247	5.16208	57.6551	7.16611	1.69712	0.848562	180.582
5	2	77	6	4	2	1	13	2	1	90.12	12.3569	17.8303	11.9506	35.5888	5.67414	2.29451	1.14726	176.963
5	2	75	6	4	2	2	10	2	1	95.9043	17.6212	19.0975	28.1424	39.9759	2.73739	2.99936	1.49968	207.978
5	2	79	6	4	2	1	8	2	1	96.0972	15.727	42.7353	9.91898	80.8337	6.77168	2.86814	1.43407	256.386
5	2	79	6	4	2	1	21	3	1	142.476	19.0731	22.3476	13.8388	28.3229	6.71121	2.86814	1.43407	237.072
3	2	78	6	4	2	1	13	2	1	248.344	17.9737	0.358517	24.3075	25.0245	6.90242	3.25056	1.62528	327.786
2	2	79	6	4	1	1	4	1	1	50.9343	5.90359	1.19506	5.95139	27.3429	2.40111	0.956046	0.478023	95.1625
2	2	76	6	4	2	1	9	2	1	82.7986	8.36541	24.3792	11.4248	33.7006	6.29079	1.52967	0.764837	169.254
2	2	77	6	4	2	1	11	2	1	83.1043	11.2335	69.8153	2.89204	58.6773	5.10481	1.91209	0.956046	233.696
2	2	56	4	4	2	1	15	3	1	97.5151	13.4803	55.14	37.8833	61.3304	13.6272	2.29451	1.14726	282.418
2	2	78	6	4	2	1	12	2	1	133.909	16.8503	55.2595	10.7555	73.52	8.39026	2.86814	1.43407	302.987
2	2	77	6	4	2	1	9	2	1	134.329	11.9506	30.3545	40.0583	45.3883	8.82168	2.1033	1.05165	274.058
2	2	76	6	4	2	2	12	2	1	147.896	16.5199	16.9886	27.3926	9.04495	8.54185	2.99936	1.49968	230.883
2	2	77	6	4	2	2	9	2	1	171.548	9.91195	21.2064	2.27295	55.6756	3.41177	1.68714	0.84357	266.557
2	2	75	6	4	2	1	10	2	1	315.143	32.5773	44.1215	20.4116	82.3634	4.3536	5.54507	5.54507	510.06
5	1	79	6	4	2	2	26	4	1	41.6093	7.7093	17.8087	10.9898	21.4407	4.59441	1.49968	0.74984	106.402
5	1	78	6	4	2	1	19	3	1	60.9676	11.2335	0	14.2451	10.4687	4.26349	2.1033	1.05165	104.333
5	1	78	6	4	2	1	23	4	1	88.5172	12.9305	32.888	4.0393	50.0968	7.44856	2.1033	1.05165	199.075
5	1	79	6	4	2	2	14	2	1	109.078	14.0595	31.7511	19.4958	50.4736	6.79965	2.43698	2.43698	236.532
5	1	77	6	4	2	2	17	3	1	114.705	8.88092	16.0513	12.2552	36.6016	6.13065	2.24952	1.12476	197.999
5	1	79	6	4	2	2	15	3	1	130.124	13.2159	40.1868	6.02216	97.737	5.97623	2.24952	1.12476	296.637
5	1	79	6	4	2	2	17	3	1	140.09	15.4186	26.9708	4.10069	47.3337	14.7779	2.62444	1.31222	252.629
5	1	77	6	4	1	2	3	1	1	145.61	15.4186	24.0652	15.8638	44.3109	10.4026	2.8119	1.40595	259.889
5	1	75	6	4	2	1	10	2	1	154.306	17.9737	39.9149	15.0577	28.1795	10.7304	3.25056	1.62528	271.038
5	1	75	6	4	2	2	8	2	1	213.719	9.34957	0	7.73273	25.4477	3.06638	1.49968	0.74984	261.565
2	1	79	6	4	2	1	8	2	1	61.6767	0	11.9745	0	40.0344	0.681183	0	0	114.367
2	1	76	6	4	2	1	10	2	1	68.5132	15.1055	12.4286	13.8866	27.1756	5.81922	2.67693	1.33846	146.944
2	1	79	6	4	2	2	5	1	1	95.1308	13.2159	19.3318	7.07662	53.6604	4.2291	2.24952	1.12476	196.019
2	1	76	6	4	1	1	6	1	1	115.204	14.6036	84.3711	25.2874	50.9334	6.91676	2.67693	1.33846	301.332
2	1	77	6	4	2	1	14	2	1	160.124	8.98684	19.4794	6.02309	46.9897	3.76348	1.72088	1.00385	248.091
1	1	75	6	4	2	2	8	2	1	85.1205	14.3173	14.6453	7.5687	28.7048	4.57707	2.62444	1.31222	158.87
5	1	77	6	1	2	2	6	1	1	84.6354	9.91195	34.5395	17.2463	17.2229	5.21467	1.8746	0.9373	171.583
5	1	79	6	5	2	2	19	3	1	95.8514	11.0133	28.6111	6.25648	54.1525	8.70705	1.8746	1.8746	208.341
5	2	79	6	4	2	2	22	4	1	166.368	14.3173	18.1602	7.28751	13.0519	1.61473	2.43698	1.40595	224.643
5	1	80	7	4	2	2	26	4	1	63.47	9.30271	29.1969	4.00696	32.4775	6.1515	1.49968	0.890435	146.996
5	1	80	7	4	2	1	9	2	1	108.093	11.2335	35.3976	52.5108	62.0235	7.69665	1.91209	0.956046	279.824
5	1	80	7	4	2	1	9	2	1	173.608	15.2967	35.1586	46.4161	94.1228	11.899	4.01539	2.0077	382.524
5	1	80	7	4	2	1	22	4	1	365.807	26.9605	38.7916	31.2866	36.2342	9.5313	4.78023	2.39012	515.782
1	1	80	7	4	2	1	10	2	1	313.392	27.2473	56.6457	133.918	106.384	7.30802	3.63298	3.63298	652.162
1	2	80	7	3	1	1	7	1	1	121.164	13.0022	33.7006	22.0369	82.6024	9.03703	2.29451	1.14726	284.985
5	1	56	4	1	2	1	10	2	1	81.3837	5.24888	43.6079	11.3882	63.2912	5.57108	1.49968	0.74984	212.74
5	1	80	7	1	2	1	11	2	1	90.9387	13.5759	57.6257	14.9382	25.5742	6.59194	2.67693	1.33846	213.26
5	1	80	7	4	2	2	19	3	1	90.4403	8.13108	13.8252	16.9417	36.5313	3.64071	1.49968	0.74984	171.76
5	1	80	7	4	2	2	18	3	1	127.298	18.7226	8.90435	21.9563	24.1355	8.23864	3.37428	1.68714	214.317
5	1	80	7	4	2	2	17	3	1	56.0695	12.1146	31.5167	7.7093	32.5712	3.68265	2.06206	1.03103	146.757
5	2	85	7	4	2	2	4	1	1	36.3689	6.60797	22.8467	5.74096	24.487	1.73307	1.31222	0.65611	99.7529
5	2	87	7	4	2	1	10	2	1	44.6017	7.09864	35.1586	7.81568	26.0523	2.95633	1.33846	0.669232	125.691
5	2	84	7	4	2	1	8	2	1	57.4617	9.05854	26.5542	8.74782	47.7067	4.19489	1.72088	0.860442	156.305
5	2	85	7	4	2	1	12	2	1	63.6964	6.88353	17.9498	10.7794	17.2088	5.16839	1.72088	0.860442	124.268
5	2	84	7	4	2	1	9	2	1	85.8054	7.64837	27.821	4.68463	52.1045	3.49578	2.1033	1.05165	184.715
2	2	83	7	4	1	1	5	1	1	61.6621	11.2335	24.7855	13.6476	32.7924	5.87443	2.1033	1.05165	153.151
5	1	83	7	4	2	1	19	3	1	115.303	15.727	24.2597	11.8789	33.3182	6.6015	2.67693	1.33846	211.104
5	1	85	7	4	2	2	9	2	1	126.129	16.5902	4.8271	4.19442	52.3951	7.89418	2.99936	1.49968	216.529
5	1	87	7	4	2	1	23	4	1	256.013	25.1201	67.1862	7.62447	102.942	8.58147	4.58902	2.29451	474.351
2	1	37	2	5	2	2	36	6	1	65.9227	9.91195	39.7415	6.51424	34.9144	7.98111	1.68714	0.84357	167.517
2	2	49	3	5	2	1	36	6	1	139.154	14.6036	3.70468	37.0707	75.6472	10.3291	2.67693	1.33846	284.524
2	2	52	4	5	2	1	9	2	1	148.729	13.4803	70.0304	14.1734	50.1924	8.49925	2.29451	1.14726	308.547
2	2	59	4	5	2	2	8	2	1	186.725	18.7226	35.4065	13.7783	82.3887	11.5635	3.18682	1.59341	353.365
6	1	46	3	5	1	1	28	4	1	73.8995	8.98684	57.2433	5.40166	30.7369	4.58807	1.72088	0.860442	183.438
5	1	29	1	5	2	1	10	2	1	60.8641	8.98684	15.4162	8.36541	30.235	2.8256	1.52967	0.764837	128.988
5	1	40	3	5	2	1	3	1	1	75.3264	10.7555	7.81568	20.4594	10.875	3.93939	1.91209	0.956046	132.04
5	1	42	3	5	2	1	28	4	1	131.536	16.8503	60.1353	22.013	52.3674	7.78987	3.05935	1.52967	295.281
2	1	46	3	5	2	1	14	2	1	62.4305	10.1102	22.2281	9.60827	45.5556	4.45231	1.72088	0.860442	156.966
2	2	58	4	5	2	2	6	1	1	130.292	13.2862	4.8271	10.6149	26.5959	4.77555	2.24952	1.12476	193.766
5	1	42	3	5	2	1	17	3	1	181.151	18.1171	28.2512	15.6553	33.9396	15.9801	3.05935	1.52967	297.683
2	1	61	5	5	2	1	11	2	1	69.1358	12.3569	14.4602	8.1742	19.838	5.0398	2.29451	1.14726	132.447
2	1	56	4	5	2	2	6	1	1	72.63	11.0133	15.4889	10.6384	27.6504	3.24493	2.06206	1.03103	143.759
1	1	43	3	5	2	1	30	5	1	116.392	13.4803	3.46567	13.552	10.4209	5.27833	2.29451	1.14726	166.031
5	2	56	4	4	2	2	11	2	1	57.6482	12.1146	33.157	11.0836	26.7131	4.29612	2.06206	1.03103	148.106
5	2	68	5	4	2	2	4	1	1	71.8923	8.10765	26.5959	10.1697	29.8764	6.12198	1.49968	0.74984	155.014
5	2	56	4	4	2	2	6	1	1	128.669	15.4186	28.7048	15.6529	32.5946	7.8124	2.62444	1.31222	232.789
2	2	61	5	4	2	2	14	2	1	70.8369	6.60797	9.04495	9.32614	21.3236	2.54618	1.12476	0.56238	121.373
2	2	62	5	4	2	1	8	2	1	75.1173	8.98684	21.6784	11.8789	36.9751	5.86128	1.72088	0.860442	163.079
2	2	56	4	4	2	2	4	1	1	99.8965	14.4579	27.2286	6.25648	57.5502	6.02965	2.24952	1.12476	214.794
2	2	65	5	4	2	2	10	2	1	108.959	13.4971	22.2843	15.0671	40.3273	6.76543	3.37428	1.68714	211.962
5	1	50	4	4	2	2	16	3	1	41.1376	4.47561	26.4787	4.87396	44.4046	2.63077	0.9373	0.46865	125.407
5	1	78	6	4	2	2	5	1	1	53.4328	5.27994	33.4711	4.24281	44.1252	3.22689	1.50855	0.754277	146.042
5	1	88	7	4	2	1	22	4	1	81.8218	5.35386	25.1201	9.46486	30.474	4.80031	1.52967	0.764837	159.329
5	1	60	5	4	2	2	15	3	1	95.454	11.0133	45.2247	9.98225	50.872	3.16386	2.06206	1.03103	218.803
5	1	77	6	4	2	1	8	2	1	118.913	9.17805	68.7158	3.46567	52.3674	5.10385	2.29451	1.14726	261.185
2	1	51	4	4	2	1	2	1	1	133.644	22.4671	40.7754	12.094	26.602	7.29368	3.82419	1.91209	248.612
2	1	64	5	4	2	1	10	2	1	176.143	15.727	32.5056	14.3646	63.5771	6.29939	2.86814	1.43407	312.919
5	2	39	2	3	2	1	8	2	1	73.8414	8.98684	33.7245	2.17501	66.2301	3.26107	1.72088	0.860442	190.8
5	2	78	6	3	2	1	12	2	1	97.8561	12.3569	22.3237	12.6915	22.2042	5.57757	2.29451	1.14726	176.452
5	2	48	3	3	2	1	6	1	1	151.718	12.3569	49.1886	42.4246	54.7815	8.43472	2.29451	1.14726	322.346
5	2	60	5	2	2	2	5	1	1	116.986	11.0133	35.8283	7.84989	73.2969	5.70511	1.8746	1.68714	254.241
5	2	45	3	2	2	2	3	1	1	152.036	17.6212	53.8948	14.3407	51.1063	21.8593	2.99936	1.49968	315.357
2	2	39	2	2	2	2	13	2	1	18.1093	4.40531	19.0975	3.60861	34.4224	1.62012	0.74984	0.37492	82.388
2	2	40	3	2	2	2	11	2	1	80.6688	14.3173	37.2811	14.3876	33.0398	6.47628	2.43698	1.21849	189.826
5	1	43	3	2	2	2	25	4	1	118.981	15.0671	37.2811	7.73273	60.2684	6.92524	2.62444	1.31222	250.192
2	1	49	3	2	2	1	14	2	1	56.7538	13.1217	12.9305	14.0539	23.208	4.27162	2.48572	1.24286	128.068
2	1	37	2	2	2	1	16	3	1	64.6283	8.81062	13.6143	13.0988	15.7935	5.13734	1.68714	0.84357	123.614
5	2	49	3	1	2	1	9	2	1	58.8805	10.1102	32.3383	10.2775	49.81	3.42312	1.72088	0.860442	167.421
5	1	42	3	1	2	1	29	5	1	80.7436	11.2335	13.7432	7.74398	27.2234	3.35094	2.1033	1.05165	147.194
5	1	55	4	1	2	1	10	2	1	103.779	16.3723	0	6.42941	41.2295	3.57227	2.67693	1.33846	175.398
5	1	57	4	5	2	1	27	4	1	80.7759	11.3052	0	15.2489	22.491	6.38926	1.91209	1.09945	139.222
5	1	56	4	5	2	2	7	1	1	100.8	10.4743	26.5256	12.5364	47.8023	5.65544	1.8746	0.9373	206.606
5	2	54	4	5	2	2	13	2	1	89.6033	10.7321	14.8796	11.4116	20.9487	6.20587	1.8746	0.9373	156.593
2	2	51	4	4	2	2	2	1	1	25.9267	11.4351	23.3388	2.31982	53.801	2.79128	1.8746	0.9373	122.425
2	1	58	4	4	2	2	7	1	1	78.9052	11.0133	24.2761	4.17099	57.6674	6.21758	1.8746	0.9373	185.062
6	2	52	4	3	2	2	18	3	1	119.704	11.7631	45.9512	10.7555	35.8752	6.29163	2.24952	1.12476	233.715
5	1	53	4	2	2	2	17	3	1	65.7162	5.50664	20.0348	2.17922	42.5534	4.2455	0.9373	0.46865	141.642
5	1	53	4	2	2	1	16	3	1	148.643	14.6036	35.7561	29.3267	76.5315	10.5136	2.67693	1.33846	319.39
5	2	63	5	5	2	1	9	2	1	54.4239	12.3569	2.1511	4.111	17.2327	3.09807	2.1033	1.05165	96.5287
2	2	57	4	5	2	1	3	1	1	60.5177	12.3569	25.4547	13.2412	22.4671	5.43871	2.29451	1.33846	143.109
5	2	73	6	4	2	2	17	3	1	53.0643	4.40531	1.28879	2.20266	36.3204	1.68878	0.74984	0.74984	100.47
5	2	72	6	4	2	1	17	3	1	67.3095	10.1102	14.9382	12.5481	36.2103	3.21566	1.72088	0.860442	146.913
5	2	65	5	4	2	1	3	1	1	74.0929	8.98684	16.3723	12.094	31.1671	5.51973	1.72088	0.860442	150.814
5	2	72	6	4	2	1	10	2	1	84.1228	9.03464	15.5358	7.76788	12.8349	6.02453	1.72088	0.860442	137.902
5	2	73	6	4	2	1	15	3	1	127.752	15.727	29.6972	12.6198	20.9135	4.24724	2.67693	1.33846	214.973
2	2	69	5	4	3	2	58	6	1	30.4599	34.3521	42.4128	29.0329	143.032	4.02571	4.12412	2.62444	290.064
2	2	57	4	4	2	1	12	2	1	41.0507	5.44946	38.8394	1.12335	52.0328	1.98475	0.764837	0.382419	141.628
2	2	64	5	4	2	2	10	2	1	61.1174	9.34957	29.6187	5.06142	69.2196	1.54022	1.31222	0.65611	177.875
2	2	73	6	4	1	1	4	1	1	69.6762	14.6036	69.0266	3.87199	69.3612	3.87438	2.48572	1.45797	234.358
2	2	72	6	4	2	1	20	3	1	197.639	14.6036	7.93519	42.2573	75.9101	8.31354	2.67693	1.33846	350.674
2	2	63	5	4	2	1	11	2	1	198.591	26.9605	54.1361	16.5874	83.0804	1.87552	4.58902	4.58902	390.409
2	2	63	5	4	2	1	8	2	1	200.793	11.2335	37.8355	8.48491	94.8876	3.03784	1.91209	2.1033	360.288
6	1	65	5	4	2	1	14	2	1	92.3997	10.1102	8.72392	3.15495	57.2672	4.32898	1.72088	0.860442	178.566
5	1	70	6	4	4	1	8	2	1	35.1211	12.9305	2.86814	11.7594	21.0569	1.2474	2.29451	2.29451	89.5725
5	1	71	6	4	2	2	11	2	1	111.32	16.0513	14.0595	11.4819	32.126	9.46345	2.62444	2.62444	199.751
5	1	63	5	4	2	1	7	1	1	152.871	75.2887	60.3504	8.48491	71.4884	13.0338	1.72088	1.72088	384.959
4	1	70	6	4	2	2	5	1	1	73.2854	9.04495	24.5104	10.7555	27.416	5.63411	1.49968	0.74984	152.896
2	1	64	5	4	2	1	4	1	1	214.456	13.4803	95.6046	8.96293	70.4128	6.30369	2.48572	1.24286	412.949
5	2	66	5	3	2	2	10	2	1	66.2581	11.0784	50.4659	9.66418	33.3532	4.41394	2.07426	1.03713	178.345
5	2	74	6	5	2	1	21	3	1	255.347	18.0454	5.73628	52.7021	56.574	18.3401	3.05935	3.05935	412.863
5	2	82	7	5	2	2	29	5	1	98.3191	13.2159	25.682	13.5674	20.5034	6.33264	2.24952	1.12476	180.995
2	2	80	7	5	2	1	9	2	1	71.8321	9.05854	22.3476	9.27365	75.7428	3.52901	1.72088	0.860442	194.365
6	1	51	4	5	2	1	6	1	1	123.455	13.4803	24.6421	5.47337	70.1738	5.21619	2.29451	1.14726	245.882
5	1	81	7	5	2	2	1	1	1	85.2918	11.0133	19.0038	10.3572	29.525	4.51146	2.06206	1.03103	162.795
2	1	57	4	5	2	1	8	2	1	129.376	11.2335	30.952	11.9028	67.2818	5.25587	2.1033	1.05165	259.157
5	2	79	6	4	2	1	10	2	1	53.5962	8.98684	30.952	7.19425	29.7569	2.7515	1.72088	0.860442	135.819
3	2	80	7	4	2	1	4	1	1	71.7427	7.86348	14.9382	4.42171	44.5996	3.50056	1.52967	0.764837	149.361
2	2	53	4	4	2	1	7	1	1	87.7048	8.98684	27.1517	12.094	38.0028	4.74151	1.72088	0.860442	181.263
2	2	47	3	4	2	2	14	2	1	102.853	11.7163	26.0101	3.93666	44.2874	8.71502	1.8746	0.9373	200.331
2	2	49	3	4	2	1	10	2	1	145.789	15.7987	17.2327	5.21045	44.8386	8.12926	2.86814	1.64918	241.516
5	1	77	6	4	2	2	4	1	1	130.903	23.4325	30.3451	11.3179	36.5313	6.08378	1.8746	0.9373	241.425
5	1	83	7	4	2	2	18	3	1	320.51	32.3837	92.8513	128.012	188.983	46.4648	5.34261	17.1526	831.7
2	1	44	3	4	2	1	11	2	1	50.4386	8.98684	13.7432	7.52887	35.8517	3.28976	1.72088	0.860442	122.42
2	1	57	4	4	2	1	9	2	1	120.685	13.4803	31.6929	5.54507	46.0336	8.27315	2.48572	1.24286	229.438
2	1	75	6	4	2	1	11	2	1	121.594	10.1102	14.4841	12.3808	38.8872	5.01972	1.91209	0.956046	205.344
6	1	55	4	3	2	1	14	2	1	76.382	8.88092	21.2299	8.67003	16.2856	3.35483	1.68714	0.84357	137.334
6	1	62	5	3	2	1	4	1	1	149.904	15.4186	39.2495	30.6732	41.1241	11.0908	2.62444	1.31222	291.397
5	1	44	3	3	2	1	3	1	1	139.173	15.727	22.2281	18.6668	21.1286	7.82715	2.86814	1.43407	229.053
2	2	25	1	1	2	1	7	1	1	71.8753	8.98684	18.9297	8.70002	25.0962	3.74005	1.52967	0.764837	139.623
5	1	37	2	1	2	1	3	1	1	136.558	15.7987	25.0962	7.28985	76.1013	9.07766	2.86814	1.43407	274.224
2	1	32	2	1	2	2	6	1	1	52.3325	7.7093	67.017	28.658	42.8815	3.43731	1.31222	0.65611	204.004
2	1	47	3	1	2	1	4	1	1	86.3826	10.8989	33.4616	7.69617	58.8208	3.35023	1.72088	0.860442	203.192
2	1	48	3	1	2	2	2	1	1	152.74	22.1906	78.7332	70.8599	23.3153	10.8014	3.56174	3.46801	365.67
5	2	81	7	5	2	2	14	2	1	43.6307	11.2906	19.5641	2.87568	36.3232	5.53074	1.88569	0.942847	122.043
5	2	81	7	5	2	2	12	2	1	79.2854	8.86276	15.7927	11.1492	18.5034	5.03504	1.69712	0.848562	141.174
5	2	81	7	5	2	2	15	3	1	85.0218	8.81062	16.6371	15.3014	45.4825	5.52	1.68714	0.84357	179.304
2	2	72	6	5	2	2	8	2	1	143.792	32.8055	112.125	33.5319	60.5965	6.51541	2.62444	1.31222	393.303
2	2	55	4	5	2	1	14	2	1	232.79	26.9605	13.4325	56.7414	28.5858	150.97	4.78023	2.39012	516.65
5	1	45	3	5	2	2	8	2	1	24.4325	7.14206	2.47497	11.7856	11.4792	4.36302	1.31999	1.31999	64.3172
5	1	56	4	5	2	1	1	1	1	49.7813	4.70853	27.6058	4.0871	32.4339	2.59662	0.956046	0.478023	122.647
5	1	45	3	5	2	2	21	3	1	61.5038	7.75491	14.732	9.16918	47.1423	5.28348	1.50855	0.754277	147.848
5	1	44	3	5	2	1	13	2	1	65.6708	6.74013	16.3723	10.8033	30.0916	4.78358	1.33846	0.669232	136.469
5	1	42	3	5	2	1	1	1	1	71.5455	13.4803	28.7531	25.9328	63.7683	2.44748	2.48572	1.24286	209.656
5	1	45	3	5	2	1	8	2	1	82.036	11.3052	41.9465	5.64067	58.5578	4.81608	1.91209	0.956046	207.17
5	1	45	3	5	2	1	3	1	1	89.0796	11.2335	21.1764	2.72473	39.4608	5.82949	2.1033	1.05165	172.66
5	1	45	3	5	2	2	20	3	1	95.5929	8.24991	41.4852	10.2535	33.4475	5.55949	1.50855	0.848562	196.946
5	1	45	3	5	2	2	25	4	1	96.9604	12.1146	21.1361	10.6384	15.6998	3.21541	2.06206	1.03103	162.858
5	1	56	4	5	2	1	1	1	1	101.368	9.53656	31.908	11.6638	61.2109	4.46187	1.52967	0.764837	222.444
5	1	44	3	5	3	1	20	3	1	107.964	13.4803	15.1772	5.42556	49.9773	6.22291	2.29451	1.14726	201.689
5	1	34	2	5	2	1	12	2	1	118.056	14.6036	23.7339	14.5797	21.3676	4.26684	2.48572	1.24286	200.336
5	1	56	4	5	2	1	5	1	1	122.754	12.3569	40.1778	15.8704	58.3427	7.24325	2.1033	1.05165	259.9
5	1	49	3	5	2	1	9	2	1	124.084	18.1171	35.2542	22.969	37.4531	14.5312	3.05935	3.05935	258.527
5	1	44	3	5	2	1	1	1	1	136.469	14.6036	32.3861	3.48957	53.8971	4.24724	2.48572	1.24286	248.821
5	1	56	4	5	2	1	1	1	1	140.315	14.6753	42.066	7.60057	92.7843	10.3626	2.48572	2.39012	312.68
5	1	57	4	5	2	1	7	1	1	141.84	13.4803	61.187	18.5712	70.5323	7.47891	2.48572	2.0077	317.583
5	1	49	3	5	3	1	12	2	1	162.964	20.316	5.61677	21.7023	18.5234	7.16676	3.44177	3.15495	242.886
5	1	57	4	5	3	1	2	1	1	166.188	20.1726	24.1402	24.4987	46.1292	10.494	3.25056	1.62528	296.498
5	1	49	3	5	2	1	3	1	1	188.272	10.0385	27.7253	15.8226	44.0737	7.01571	1.91209	1.91209	296.772
5	1	44	3	5	2	1	1	1	1	263.987	76.4837	39.8193	81.0966	123.449	16.8341	6.1187	3.05935	610.848
5	1	55	4	5	2	2	12	2	1	357.781	24.2292	42.7643	30.8606	118.147	14.1814	4.31158	2.15579	594.431
4	1	60	5	5	2	1	10	2	1	149.604	23.5904	34.7762	16.1572	53.4191	7.31806	4.01539	2.0077	290.888
2	1	65	5	5	2	2	5	1	1	61.3772	6.64707	24.1604	3.72424	64.4907	3.08924	1.13142	0.565708	165.186
2	1	68	5	5	2	2	9	2	1	67.8486	13.2159	18.2305	10.1463	33.9771	3.45864	2.43698	1.21849	150.533
2	1	51	4	5	2	1	8	2	1	137.842	12.3569	22.7061	55.857	38.3614	13.5032	2.29451	1.14726	284.069
5	2	57	4	5	2	2	10	2	1	139.22	15.0202	33.8014	19.5427	83.7478	8.33073	2.43698	1.49968	303.6
5	1	41	3	5	2	2	2	1	1	91.9864	9.91195	54.7852	2.67131	62.3539	3.65828	1.68714	0.84357	227.898
5	1	56	4	5	2	2	3	1	1	94.799	9.91195	19.8239	4.10069	63.9942	3.76279	1.68714	0.84357	198.923
5	1	47	3	5	2	2	10	2	1	97.064	14.3876	33.0633	15.1374	45.5059	5.75409	2.43698	1.21849	214.568
5	1	51	4	5	3	2	7	1	1	204.486	18.7226	21.5813	5.45977	40.3039	5.60506	3.37428	1.68714	301.22
5	1	49	3	5	2	1	6	1	1	230.078	23.8295	23.4231	21.4393	20.555	9.37427	4.01539	2.0077	334.722
6	2	66	5	4	2	2	16	3	1	83.7862	10.0525	20.316	12.3489	21.3236	5.56147	1.8746	0.9373	156.201
5	2	80	7	4	2	1	11	2	1	40.729	5.61677	18.3083	1.45797	67.4252	2.05311	0.956046	0.478023	137.024
5	2	55	4	4	2	2	9	2	1	69.0228	8.81062	16.0513	5.67067	29.8764	3.12918	1.68714	0.84357	135.092
5	2	80	7	4	2	1	1	1	1	71.5168	11.2335	28.1078	14.747	27.2473	7.25066	2.1033	0.956046	163.162
5	2	65	5	4	2	2	13	2	1	89.5626	14.402	47.4252	19.5641	65.5514	5.42773	2.4514	1.2257	245.61
5	2	80	7	4	2	1	19	3	1	95.7002	11.2335	39.5803	17.1849	66.1106	18.1606	1.91209	0.956046	250.838
5	2	59	4	4	2	1	13	2	1	104.866	28.6814	15.1055	19.7663	29.3028	7.47102	2.29451	1.29066	208.779
5	2	55	4	4	2	1	6	1	1	110.801	12.3569	12.1896	13.7193	52.6065	5.56921	2.29451	1.14726	210.684
5	2	58	4	4	2	1	3	1	1	148.795	13.6237	38.7796	12.7154	54.0166	6.25708	2.48572	1.24286	277.916
5	2	58	4	4	2	2	9	2	1	182.044	13.9658	17.8087	45.7168	39.3666	16.8135	2.62444	1.31222	319.652
2	2	64	5	4	2	1	12	2	1	42.3641	7.86348	44.504	6.90744	41.4685	4.98172	1.33846	0.669232	150.097
2	2	77	6	4	2	2	14	2	1	46.9548	7.7093	27.2989	5.43634	38.6636	2.79081	1.31222	0.65611	130.822
2	2	65	5	4	2	1	11	2	1	62.0235	11.0133	26.385	5.95186	55.6756	4.08429	2.06206	1.03103	168.227
2	2	78	6	4	2	1	14	2	1	72.3003	11.2335	5.76018	4.97144	35.7561	2.83898	2.1033	1.05165	136.016
2	2	77	6	4	2	2	9	2	1	80.3327	15.4186	25.3305	17.3869	40.1868	6.8362	2.62444	1.31222	189.428
2	2	57	4	4	2	2	8	2	1	93.4938	8.81062	7.73273	8.45914	40.3039	4.16771	1.68714	0.84357	165.499
2	2	62	5	4	2	1	13	2	1	97.9185	9.39316	24.3553	5.97529	37.4053	3.54406	1.91209	0.956046	181.46
2	2	59	4	4	2	1	14	2	1	140.878	12.3569	22.2281	7.07474	28.7053	5.59502	2.29451	1.21896	220.351
2	2	57	4	4	2	2	8	2	1	180.673	20.9252	29.4078	26.4787	32.8524	10.285	3.7492	1.8746	306.246
2	2	77	6	4	2	2	6	1	1	316.915	13.3565	42.2957	4.7568	63.9942	5.36276	2.8119	1.40595	450.899
1	2	58	4	4	2	1	12	2	1	115.371	13.4803	12.9066	10.4687	89.9162	6.33046	2.48572	1.24286	252.202
1	2	87	7	4	2	2	6	1	1	211.251	19.8239	8.95122	7.17035	61.7681	5.60881	3.37428	1.68714	319.635
5	1	67	5	4	2	2	10	2	1	43.3375	5.60994	20.8841	4.92637	26.0697	2.71634	1.13142	0.565708	105.241
5	1	62	5	4	2	1	9	2	1	45.9268	4.49342	22.73	4.1349	27.2473	4.3371	0.956046	0.478023	110.304
5	1	80	7	4	2	1	10	2	1	51.5818	4.49342	24.0207	7.33766	73.1615	4.63085	0.956046	0.860442	167.042
5	1	63	5	4	2	1	4	1	1	60.6344	14.3407	82.3395	22.1086	77.7027	16.1213	1.14726	0.573628	274.968
5	1	80	7	4	2	1	7	1	1	73.629	13.4803	33.1031	15.6314	35.7322	5.52212	2.29451	1.14726	180.54
5	1	68	5	4	2	1	7	1	1	81.1884	8.98684	23.0646	7.31375	36.4493	3.62628	1.72088	0.860442	163.211
5	1	62	5	4	2	2	12	2	1	84.5288	12.8879	30.6497	17.7384	81.0999	8.25387	2.24952	1.12476	238.533
5	1	86	7	4	2	2	3	1	1	85.7806	15.1608	13.3565	32.2197	50.1221	10.2822	2.62444	2.62444	212.171
5	1	83	7	4	2	2	5	1	1	103.759	13.2159	20.5034	18.3008	38.5699	8.64004	2.24952	1.12476	206.364
5	1	53	4	4	2	2	7	1	1	109.902	14.3173	29.5718	4.07726	52.2311	3.65781	2.43698	1.21849	217.413
5	1	57	4	4	2	1	16	3	1	114.404	12.3569	8.48491	17.7825	62.1669	6.29533	2.29451	1.14726	224.932
5	1	80	7	4	2	1	6	1	1	117.659	11.2335	16.1333	16.5635	28.8009	7.08932	2.1033	1.05165	200.635
5	1	82	7	4	2	1	14	2	1	120.887	13.4803	57.6018	14.6036	42.7831	7.1082	2.29451	1.14726	259.906
5	1	57	4	4	2	1	9	2	1	124.718	26.2913	67.6881	3.03545	66.1345	6.04269	2.29451	1.14726	297.352
5	1	88	7	4	2	1	8	2	1	131.289	6.1187	42.3051	4.80413	32.2905	8.86351	1.52967	0.764837	227.965
5	1	79	6	4	2	2	8	2	1	142.399	17.3166	36.9062	18.6054	52.7466	11.1408	3.37428	1.68714	284.176
5	1	79	6	4	2	2	5	1	1	143.761	6.74856	5.97529	3.23369	36.5781	3.5833	1.68714	0.84357	202.411
5	1	59	4	4	2	1	2	1	1	154.317	17.8542	38.8394	25.0245	54.4468	7.72964	2.86814	1.43407	302.514
5	1	79	6	4	2	1	15	3	1	182.547	15.4186	27.2989	3.8195	63.9942	5.69316	2.62444	1.31222	302.708
5	1	57	4	4	2	2	10	2	1	182.669	24.2292	65.7751	53.0512	60.3621	16.1019	4.12412	2.06206	408.375
5	1	67	5	4	2	2	13	2	1	242.681	21.049	70.9963	56.3115	57.1601	14.2304	3.58282	1.79141	467.803
4	1	80	7	4	2	2	14	2	1	78.4324	6.06902	35.3831	8.27168	32.4775	5.59803	1.49968	0.74984	168.481
2	1	54	4	4	2	2	13	2	1	49.8447	6.60797	22.6124	2.34325	57.644	2.03769	1.12476	0.56238	142.777
2	1	74	6	4	2	2	11	2	1	57.6782	7.7093	20.5034	7.40467	26.3381	2.98554	1.49968	0.74984	124.869
2	1	57	4	4	2	1	7	1	1	89.8167	17.9737	17.4	18.1649	64.557	6.52263	3.25056	1.62528	219.311
2	1	57	4	4	2	2	7	1	1	98.0831	12.1146	83.6775	5.92842	54.8555	3.86355	2.24952	1.12476	261.897
2	1	82	7	4	2	2	7	1	1	102.213	13.9658	17.4572	8.55287	23.5497	4.13842	2.43698	1.21849	173.533
2	1	58	4	4	2	2	4	1	1	118.998	12.1146	28.2596	3.09309	55.0898	6.48331	2.24952	1.12476	227.413
2	1	58	4	4	2	1	10	2	1	140.218	26.7365	22.6124	8.06078	52.1608	7.72898	2.43698	1.21849	261.173
5	1	54	4	2	3	1	15	3	1	126.501	17.7108	33.2465	5.54507	53.8015	5.58092	2.48572	1.24286	246.115
5	1	35	2	2	3	2	2	1	1	130.432	16.5199	0	6.74856	45.7168	4.3936	2.8119	1.40595	208.029
5	1	55	4	2	3	2	20	3	1	143.691	17.3635	32.2197	5.57694	72.6642	7.00585	2.43698	1.21849	282.177
1	1	66	5	2	2	2	8	2	1	60.5937	13.4971	22.6124	10.5446	27.8847	5.8436	2.43698	1.21849	144.632
5	2	52	4	1	2	1	9	2	1	23.0646	4.58902	23.0646	6.28601	26.8649	4.76685	1.14726	0.573628	90.3569
5	2	57	4	1	2	2	13	2	1	85.5713	4.40531	42.4597	5.57694	36.5781	4.5752	0.9373	0.46865	180.573
5	2	59	4	1	2	2	19	3	1	86.996	8.20138	24.9556	15.981	35.3128	6.2621	1.49968	0.74984	179.958
2	2	70	6	1	2	2	4	1	1	107.557	16.4028	21.9328	5.06142	35.7346	6.14682	1.31222	0.65611	194.804
5	1	38	2	1	2	1	9	2	1	35.1397	5.90359	16.3962	1.38627	30.9759	2.25627	0.956046	0.478023	93.492
5	1	50	4	1	4	1	19	3	1	44.716	4.49342	11.5204	4.0632	36.5927	1.64559	0.956046	0.478023	104.465
5	1	53	4	1	2	2	3	1	1	46.8948	5.92842	19.0975	9.5136	19.8239	4.22676	1.31222	0.65611	107.453
5	1	45	3	1	3	2	1	1	1	59.4525	8.88092	39.1323	10.3806	40.8897	3.96384	1.68714	0.84357	165.231
5	1	40	3	1	2	1	1	1	1	61.285	8.07859	41.0383	16.5874	38.0267	7.4433	1.33846	0.956046	174.754
5	1	57	4	1	3	1	1	1	1	63.2701	7.7093	17.5041	9.20898	35.2659	4.33736	1.49968	0.74984	139.545
5	1	50	4	1	2	2	7	1	1	64.8286	8.20138	27.416	9.23241	29.8764	5.44595	1.49968	0.74984	147.25
5	1	41	3	1	2	1	5	1	1	74.4636	9.96678	32.8641	13.1217	29.6374	5.21476	1.91209	0.956046	168.137
5	1	44	3	1	2	1	1	1	1	76.7175	40.871	17.9259	126.843	24.3792	5.96788	5.73628	5.73628	304.177
5	1	48	3	1	2	1	4	1	1	78.2651	14.6036	0.717035	17.1132	13.3846	6.24107	2.48572	1.52967	134.34
5	1	57	4	1	2	1	1	1	1	78.8773	10.404	26.3616	19.9411	27.5566	6.71435	1.8746	1.14819	172.878
5	1	57	4	1	2	2	17	3	1	79.3338	10.5446	22.9639	21.5813	36.1798	5.07056	1.8746	1.8746	179.423
5	1	54	4	1	2	1	9	2	1	82.687	12.0209	32.7586	2.39012	45.7168	3.20088	1.68714	0.84357	181.305
5	1	58	4	1	2	2	10	2	1	90.61	16.1919	36.3907	24.2995	51.1063	11.0939	2.62444	1.31222	233.629
5	1	45	3	1	2	1	1	1	1	92.7391	12.8176	30.8372	31.9619	67.0404	8.24215	2.06206	2.08549	247.786
5	1	45	3	1	2	1	1	1	1	94.0274	14.3173	22.3077	25.9632	47.3337	7.94409	2.62444	1.31222	215.83
5	1	51	4	1	2	1	13	2	1	97.1847	12.3569	29.2072	14.269	42.9982	6.64596	2.29451	1.14726	206.104
5	1	55	4	1	2	1	14	2	1	97.467	12.3569	18.1649	16.0616	35.4693	6.46957	2.29451	1.14726	189.431
5	1	50	4	1	2	2	1	1	1	99.669	12.1146	19.7067	5.03799	53.4496	3.96431	2.24952	1.12476	197.316
5	1	44	3	1	2	1	1	1	1	101.067	12.3569	75.9818	15.2728	20.5789	4.20254	2.29451	1.14726	232.902
5	1	57	4	1	2	1	1	1	1	104.314	7.86348	0.836541	2.29451	31.191	2.51966	1.52967	0.764837	151.314
5	1	58	4	1	2	2	1	1	1	108.894	11.5757	24.1355	13.2862	22.1437	4.63495	2.06206	1.03103	187.764
5	1	46	3	1	2	1	12	2	1	111.848	13.4803	25.8133	22.2759	31.43	6.09623	2.29451	1.14726	214.385
5	1	44	3	1	3	2	11	2	1	149.651	16.5199	29.7593	6.79543	47.1228	5.56475	2.8119	1.40595	259.632
5	1	51	4	1	2	2	4	1	1	158.513	17.6212	26.6193	7.87332	82.0372	5.97623	3.18682	1.59341	303.421
5	1	59	4	1	2	2	8	2	1	175.955	18.7226	16.1684	16.1919	68.5635	10.6173	3.18682	1.59341	310.999
5	1	57	4	1	2	2	1	1	1	185.041	13.2862	19.3318	8.76376	59.5186	10.3794	2.43698	1.21849	299.976
5	1	58	4	1	2	2	15	3	1	238.23	18.7226	44.0531	28.7283	45.5997	11.3123	3.37428	1.68714	391.707
5	1	60	5	1	3	1	1	1	1	285.884	25.8372	52.463	64.9873	45.6751	14.4963	4.58902	2.29451	496.226
5	1	57	4	1	2	1	1	1	1	317.436	29.5657	63.5771	127.919	141.447	15.4894	4.97144	3.82419	704.23
3	1	58	4	1	2	2	1	1	1	138.261	13.2159	51.3172	6.7017	69.0322	8.76423	2.24952	1.12476	290.667
2	1	57	4	1	2	1	6	1	1	71.0668	14.6036	15.8943	1.91209	65.2741	2.87674	2.48572	1.24286	175.356
2	1	53	4	1	2	2	9	2	1	73.8773	8.81062	24.8385	8.34197	28.3299	4.72915	1.49968	0.74984	151.177
2	1	50	4	1	2	1	13	2	1	143.904	14.6036	46.7507	49.093	92.1868	8.96819	2.48572	1.24286	359.234
2	1	50	4	1	2	1	6	1	1	250.948	32.0037	95.3895	70.7713	108.918	33.1827	2.48572	4.56512	598.264
5	1	70	6	5	2	2	12	2	1	100.855	13.2941	20.9783	7.6842	22.4869	4.59826	2.4514	1.2257	173.574
5	1	71	6	5	2	2	10	2	1	53.9869	8.81062	21.9094	10.9898	42.9049	4.37321	1.68714	0.84357	145.506
5	1	62	5	5	2	1	7	1	1	260.835	20.2204	1.31456	6.59672	96.4651	3.13488	3.44177	3.72858	395.737
2	2	74	6	4	2	1	28	4	1	22.0906	3.37006	42.2573	1.38627	70.1738	1.25983	0.573628	0.286814	141.398
5	1	67	5	4	2	1	17	3	1	66.232	10.1102	7.64837	4.1349	30.8564	5.71764	1.91209	0.956046	127.568
4	1	76	6	4	2	1	23	4	1	95.4309	11.2335	0	24.4031	63.601	5.1887	2.1033	1.05165	203.012
5	1	91	8	5	3	2	21	3	1	2.73378	5.2328	40.896	4.64352	43.7245	6.41371	1.13142	1.13142	105.907
5	1	39	2	5	2	1	9	2	1	75.8503	8.98684	14.2212	15.5119	26.6737	8.46722	1.72088	0.860442	152.292
5	1	40	3	5	2	1	3	1	1	131.701	14.6036	38.3853	19.5033	53.921	5.04362	2.67693	1.33846	267.174
5	1	55	4	5	2	1	15	3	1	432.578	42.6875	42.5919	23.8056	92.6409	12.6824	7.26595	7.26595	661.518
2	1	44	3	5	2	1	11	2	1	149.801	13.4803	9.67997	9.05854	89.0079	6.61297	2.29451	1.14726	281.083
2	1	57	4	5	2	2	12	2	1	215.485	25.8695	39.4838	16.7308	89.0435	7.81755	3.56174	2.20266	400.195
5	1	37	2	5	2	1	4	1	1	13.6213	3.37006	15.4401	0.549727	31.5973	1.26676	0.573628	0.286814	66.7057
2	2	57	4	4	2	2	11	2	1	151.146	10.9664	39.3432	13.3331	47.8023	1.58099	1.49968	1.03103	266.703
5	1	36	2	1	2	2	7	1	1	40.3447	7.7093	27.6504	6.18618	35.055	3.59033	1.49968	0.74984	122.785
5	1	42	3	1	2	1	12	2	1	41.443	6.60797	10.0994	4.96769	29.8764	2.91969	1.12476	0.56238	97.6013
5	1	31	2	1	2	1	8	2	1	53.8006	9.91195	28.9157	5.10829	78.4989	1.57888	1.68714	1.68714	181.189
5	1	43	3	1	2	2	21	3	1	58.4285	7.7093	24.6276	4.54591	50.4033	3.73444	1.49968	0.74984	151.699
2	1	41	3	1	2	2	1	1	1	24.3642	8.81062	1.17163	2.64787	29.0563	1.66699	1.49968	0.74984	69.9671
2	1	34	2	1	2	2	6	1	1	69.1025	5.24888	28.7283	7.00632	31.0481	3.03146	1.49968	0.74984	146.415
5	1	45	3	5	2	1	1	1	1	87.0138	10.8989	3.84809	19.6468	55.5702	3.75416	1.52967	1.52967	183.791
5	1	45	3	5	2	2	5	1	1	93.1278	3.30398	18.8632	0.632678	30.9543	5.42463	0.56238	0.28119	153.15
2	1	46	3	2	2	2	6	1	1	117.536	20.2223	155.662	4.85053	71.8441	5.45603	1.68714	0.84357	378.102
5	2	50	4	4	2	1	8	2	1	175.193	16.8503	8.74782	18.0454	26.6498	6.99515	3.05935	1.52967	257.071
5	1	50	4	1	2	1	11	2	1	411.681	26.7131	37.8904	182.774	67.7434	2.91899	5.6238	4.31158	739.656
5	1	50	4	1	2	2	1	1	1	77.5883	11.0133	13.708	10.7321	26.1272	5.87851	2.06206	1.03103	148.141
5	1	53	4	5	2	2	14	2	1	126.907	11.0836	18.6288	25.3305	65.5642	6.98125	2.06206	1.49968	258.057
5	1	54	4	1	2	2	27	4	1	6.17353	2.20266	7.28751	0.28119	12.138	0.346332	0.37492	0.18746	28.9916
6	2	57	4	5	2	2	10	2	1	1.57573	0.872133	13.7891	0.542137	15.4863	0.00424281	0.377139	0.188569	32.8353
5	1	55	4	1	2	2	10	2	1	10.0933	10.2634	11.0601	1.9449	14.9031	2.65022	1.31222	0.65611	52.8834
5	1	58	4	5	2	1	12	2	1	86.8169	7.93519	15.3684	1.86429	20.2204	2.7907	1.52967	0.764837	137.29
4	1	58	4	1	2	1	11	2	1	173.429	13.2173	24.8811	12.6915	31.6929	5.66553	2.29451	1.14726	265.019
5	2	81	7	4	2	1	14	2	1	22.4099	3.51488	17.879	2.08549	22.9404	0.0782646	0.56238	0.28119	69.7516
5	1	59	4	2	2	2	11	2	1	83.199	9.91195	13.5909	28.0018	19.777	4.5363	1.8746	0.9373	161.829
2	1	44	3	1	2	2	14	2	1	175.552	14.5985	23.7254	30.9309	66.8061	8.2923	2.62444	1.49968	324.029
6	1	52	4	5	2	2	2	1	1	60.0927	12.1146	15.3717	11.271	31.8682	2.95203	2.06206	1.03103	136.763
5	2	52	4	4	2	2	11	2	1	102.65	14.3876	31.0715	11.2007	92.4647	7.94479	2.43698	2.43698	264.593
2	2	52	4	4	2	2	10	2	1	98.3762	11.7163	10.3103	14.6219	36.8125	3.7813	2.06206	1.03103	178.712
5	2	52	4	2	2	2	9	2	1	138.316	15.4186	48.2944	8.08422	73.953	7.65728	2.62444	1.31222	295.66
5	1	52	4	1	2	2	7	1	1	94.6924	7.7093	46.4198	1.73401	43.561	6.88471	1.31222	1.31222	203.626
5	1	52	4	2	2	2	13	2	1	77.7891	16.5199	5.97529	8.71689	33.86	4.89646	2.8119	2.8119	153.381
2	2	52	4	4	2	2	8	2	1	44.7573	5.50664	13.1456	2.64787	43.6782	2.96046	0.9373	0.46865	114.102
5	1	52	4	5	2	2	12	2	1	158.263	13.3565	13.2394	5.29575	62.682	10.7457	1.8746	1.8746	267.332
5	1	52	4	5	2	2	10	2	1	59.4469	7.7093	19.0975	2.92906	22.9639	3.02748	1.31222	1.31222	117.799
2	1	52	4	5	2	2	4	1	1	7.57341	6.64707	22.039	2.09783	85.2333	0.592815	1.13142	0.565708	125.881
5	2	52	4	3	2	2	1	1	1	75.8749	14.4727	22.7462	16.6412	25.6926	6.55703	2.63997	1.31999	165.945
5	1	36	2	4	2	1	9	2	1	77.9587	13.552	19.9575	5.64067	31.5973	4.61818	2.29451	2.29451	157.913
2	1	32	2	2	2	2	7	1	1	56.2359	9.23241	5.74096	3.51488	9.02152	79.5948	1.49968	1.54655	166.387
2	1	39	2	1	2	2	7	1	1	147.652	23.9949	0	99.9397	0.351488	63.7531	3.7492	4.31158	343.751
5	1	45	3	5	2	1	10	2	1	254.974	25.6698	79.9016	41.588	75.9818	8.55446	3.44177	3.44177	493.553
2	1	46	3	2	2	2	14	2	1	173.817	18.3242	55.4882	17.2932	127.121	12.8417	2.99936	1.49968	409.385
2	1	47	3	1	2	1	11	2	1	107.927	7.86348	1.31456	3.32226	28.5141	0.450537	1.33846	0.669232	151.399
5	1	47	3	5	2	2	9	2	1	168.547	15.9107	70.7896	13.8486	73.6015	3.94369	2.62444	1.31222	350.578
5	1	48	3	5	2	1	9	2	1	41.4714	7.86348	31.5256	3.25056	72.301	1.15251	1.33846	0.669232	159.572
5	2	51	4	5	2	1	7	1	1	172.743	15.727	2.86814	12.4764	39.8671	3.04071	2.67693	1.33846	250.738
2	1	50	4	5	2	2	11	2	1	147.399	14.402	46.0345	16.1698	74.2256	3.88853	2.4514	1.2257	305.796
5	2	50	4	4	2	1	15	3	1	37.8205	6.95524	21.2242	3.05935	87.789	1.97376	1.14726	0.573628	160.543
5	2	51	4	3	2	1	6	1	1	26.9043	8.00689	18.1649	3.39396	57.1238	0.813356	1.33846	1.33846	117.084
2	1	51	4	1	2	2	20	3	1	264.575	16.2622	54.8907	53.7073	190.202	39.305	2.62444	2.62444	624.191
5	2	52	4	3	2	2	10	2	1	181.844	25.2368	52.1373	60.3621	86.091	27.2115	3.37428	3.37428	439.631
2	1	53	4	2	2	2	8	2	1	62.0954	27.9784	0	106.173	0	46.8599	4.49904	5.13172	252.737
5	1	56	4	5	2	1	8	2	1	123.165	13.6237	24.0207	10.2775	25.8611	1.9881	2.29451	2.29451	203.525
2	2	56	4	4	2	1	13	2	1	276.499	29.9721	27.8449	47.3721	97.2777	29.9749	4.01539	4.01539	516.971
5	1	57	4	4	2	1	13	2	1	305.257	32.5295	11.2335	122.493	61.8084	51.4102	5.35386	6.07089	596.157
5	1	56	4	2	2	2	4	1	1	118.365	11.3179	33.9771	3.49144	14.9031	1.2363	1.68714	0.84357	185.821
5	1	57	4	1	2	1	8	2	1	165.709	13.9822	40.9666	13.9344	92.3541	7.82763	2.29451	1.14726	338.216
5	2	47	3	3	2	1	3	1	1	0	1.17163	1.9449	0.18746	0	0	0.18746	0.18746	3.6789
2	1	62	5	4	2	2	11	2	1	224.27	28.119	19.449	107.297	104.017	30.3496	3.56174	3.56174	520.625
1	2	52	4	5	2	1	9	2	1	56.6871	11.2335	11.1379	11.4487	30.235	6.46263	2.1033	1.05165	130.36
5	1	51	4	5	2	2	15	3	1	11.8551	5.53922	0	2.47497	0	0.536244	0.942847	0.471423	21.8198
2	1	52	4	1	2	1	9	2	1	64.3909	8.1742	15.7031	25.9806	57.7452	3.279	1.14726	1.14726	177.567
2	1	53	4	2	2	2	10	2	1	92.7599	26.3147	3.96009	5.67067	26.4787	1.74104	2.8119	1.40595	161.143
5	1	54	4	4	2	1	10	2	1	543.709	32.5773	56.1438	30.2589	104.472	9.4988	5.54507	5.16265	787.368
2	2	59	4	4	2	2	9	2	1	5.89445	2.27295	8.27168	0.09373	10.8727	0.284471	0.56238	0.18746	28.4398
2	2	75	6	4	2	1	8	2	1	143.07	12.7473	26.2444	10.1228	90.4729	10.5824	3.18682	3.32742	299.755
5	1	75	6	4	2	2	11	2	1	0.405382	3.30398	5.83469	0.632678	1.40595	0.0426472	0.56238	0.28119	12.4689
5	2	61	5	4	2	2	4	1	1	1.85	4.47561	11.81	1.0076	10.8727	0.235965	0.74984	0.37492	31.3766
5	1	43	3	5	2	1	2	1	2	68.935	6.1187	30.1155	15.3684	37.9311	4.25895	1.52967	0.764837	165.022
5	1	43	3	2	2	2	9	2	2	89.8297	8.81062	26.5022	14.9031	22.5889	3.77779	1.68714	0.84357	168.943
5	1	43	3	5	2	2	16	3	2	300.681	30.9309	2.46041	124.614	25.354	133.301	4.12412	4.12412	625.589
5	1	44	3	5	2	1	10	2	2	188.278	14.6036	25.5981	108.392	54.6381	16.7509	2.48572	3.72858	414.474
2	1	44	3	5	2	1	9	2	2	249.926	14.986	81.2639	22.5866	59.0598	17.3881	2.1033	3.15495	450.469
2	2	46	3	5	2	1	7	1	2	199.494	30.1155	17.6869	66.995	45.699	95.7117	4.01539	4.01539	463.733
2	2	44	3	2	2	2	7	1	2	230.623	14.6922	82.7168	77.96	74.2811	6.30311	2.06206	2.83533	491.473
5	1	44	3	2	2	1	2	1	2	31.1254	4.40531	0	0	21.019	0.305326	0.74984	0.74984	58.3547
2	1	46	3	2	2	2	7	1	2	120.119	10.6852	8.38884	4.42874	40.7726	2.81588	1.49968	0.74984	189.46
5	1	50	4	5	2	1	8	2	2	68.7713	8.98684	20.9135	10.875	44.0976	5.30654	1.72088	0.860442	161.532
2	1	50	4	2	2	2	8	2	2	88.0455	18.746	72.1956	12.0677	60.948	3.45958	1.68714	0.84357	257.993
2	1	50	4	1	2	2	8	2	2	166.03	14.3173	41.8505	6.53767	76.4134	7.45013	2.43698	2.43698	317.473
2	1	53	4	5	2	1	12	2	2	30.6891	4.30221	63.0991	6.71623	70.1977	2.62769	0.573628	0.286814	178.492
2	1	53	4	1	2	1	10	2	2	51.8923	6.81183	19.838	2.86814	30.8325	2.26559	0.956046	0.478023	115.942
2	2	64	5	4	2	1	9	2	2	16.8283	5.44946	52.3674	15.0099	39.413	3.05194	0.764837	0.382419	133.267
5	1	56	4	4	2	1	10	2	2	93.4332	35.8517	28.4663	3.75248	58.9164	5.36246	2.86814	1.43407	230.085
5	1	56	4	3	2	1	29	5	2	78.43	12.3569	21.6305	12.2374	35.7561	6.20139	2.29451	1.14726	170.054
5	1	56	4	4	2	1	5	1	2	129.747	6.6314	53.7776	13.8486	40.3039	2.32732	1.49968	0.74984	248.886
5	1	56	4	5	2	2	21	3	2	88.2264	8.5763	19.0975	22.2609	30.5794	2.43956	1.49968	0.74984	173.43
4	1	57	4	1	2	1	5	1	2	97.3239	7.64837	23.447	8.2698	13.05	4.31081	2.1033	1.05165	157.205
1	2	57	4	5	2	2	6	1	2	59.9983	7.75491	14.0248	3.15854	41.3674	4.20627	1.31999	1.31999	133.15
5	1	62	5	5	2	1	11	2	2	43.8438	10.1102	40.0344	5.21045	27.8449	2.75102	1.91209	0.956046	132.663
5	2	60	5	4	2	1	9	2	2	114.281	16.8503	11.3531	14.8187	23.6621	6.48176	2.86814	2.86814	193.184
4	2	60	5	4	2	1	17	3	2	77.4694	11.2335	12.094	12.2135	29.996	6.06827	1.91209	1.91209	152.899
5	1	62	5	4	2	1	9	2	2	229.239	23.5904	18.2844	20.6028	23.3036	11.4635	4.2066	2.1033	332.794
4	1	61	5	4	2	1	16	3	2	84.3627	6.81183	6.83573	7.72007	38.1702	3.63083	1.33846	0.669232	149.539
5	1	58	4	1	2	2	12	2	2	64.4249	14.3173	26.3616	10.3337	27.5332	4.72868	2.43698	2.43698	152.573
5	1	61	5	1	2	1	11	2	2	90.8954	11.2335	19.1448	2.79644	30.9998	4.08304	1.91209	1.91209	162.977
4	1	62	5	1	2	1	16	3	2	50.1769	12.3569	23.949	15.7509	41.6358	6.21478	2.29451	1.14726	153.526
4	1	62	5	1	2	1	11	2	2	84.7557	8.98684	18.9058	12.094	64.318	6.16746	1.72088	0.860442	197.809
4	1	60	5	1	2	2	7	1	2	137.367	17.6212	15.5826	28.6111	86.958	4.87232	2.99936	2.99936	297.011
2	1	60	5	1	2	2	9	2	2	57.2102	4.40531	10.6852	4.42874	21.5579	2.48431	0.74984	0.74984	102.271
5	2	81	7	4	2	1	24	4	2	36.1285	8.98684	21.033	1.9838	35.7322	3.37771	1.52967	0.764837	109.537
5	2	81	7	4	1	1	27	4	2	52.2898	4.58902	22.3715	4.35001	38.6004	3.86601	1.33846	0.669232	128.074
5	2	81	7	4	2	1	22	4	2	87.8458	8.00689	7.55277	11.7116	35.8517	5.97003	2.1033	1.05165	160.094
5	2	81	7	4	2	1	22	4	2	97.8274	8.98684	3.70468	4.0393	25.0962	3.725	1.72088	0.860442	145.961
2	2	59	4	1	2	2	6	1	2	77.1117	8.81062	40.6554	6.06902	40.96	7.80209	1.49968	0.74984	183.658
5	2	59	4	1	2	2	2	1	2	59.4164	8.81062	36.297	6.60797	35.9923	4.77133	1.68714	0.9373	154.52
2	1	43	3	5	2	2	12	2	2	67.5311	8.06134	13.9306	28.2383	17.7962	7.20382	1.69712	1.69712	146.156
2	1	45	3	1	2	1	10	2	2	80.1795	10.8989	19.5033	16.3962	58.7012	4.74653	1.72088	0.860442	193.007
2	2	45	3	1	2	1	11	2	2	60.936	8.1742	35.3737	172.614	52.3674	30.9429	1.72088	2.58133	364.711
5	2	45	3	5	2	1	8	2	2	17.7244	8.98684	1.19506	20.0053	46.0097	4.74677	1.52967	0.764837	100.963
5	2	47	3	5	2	1	9	2	2	54.3137	7.86348	0	15.3206	16.5157	4.9485	1.52967	0.764837	101.257
2	2	45	3	5	2	1	12	2	2	34.726	4.49342	12.333	1.93599	18.7624	3.97381	0.956046	0.478023	77.6587
2	2	45	3	5	2	2	10	2	2	42.8953	5.53922	10.2535	5.70422	27.319	3.26767	1.13142	0.565708	96.6759
2	2	47	3	5	2	1	5	1	2	71.0307	8.98684	0	15.4401	26.3391	5.80296	1.72088	0.860442	130.181
2	2	48	3	5	2	1	10	2	2	89.4099	12.3569	34.5372	14.9143	37.8833	8.75762	2.29451	1.14726	201.301
2	2	48	3	5	2	1	10	2	2	143.582	12.3569	30.9042	9.63217	33.366	4.47167	2.29451	1.14726	237.754
5	1	47	3	5	2	1	11	2	2	28.0724	7.86348	11.8311	11.2574	26.6976	2.56316	1.33846	0.812639	90.4363
5	1	46	3	5	2	2	9	2	2	28.4311	1.10784	2.59283	2.19212	38.7746	2.18575	0.377139	0.188569	75.8499
5	1	48	3	5	2	1	9	2	2	33.4487	7.50496	22.5866	8.222	32.6251	3.40496	1.33846	0.669232	109.8
5	1	46	3	5	2	2	11	2	2	39.2174	7.7093	22.7061	0.913868	70.7896	1.78931	1.31222	0.65611	145.094
5	1	46	3	5	2	2	14	2	2	58.5154	7.75491	30.7839	4.1721	38.0439	2.82995	1.50855	0.754277	144.363
5	1	46	3	5	2	1	11	2	2	68.2443	5.25826	0	7.79178	16.9937	0.646765	1.91209	2.1033	102.95
5	1	47	3	5	2	1	9	2	2	71.4592	7.86348	1.19506	5.37776	38.9828	5.06298	1.52967	0.764837	132.236
5	1	45	3	5	2	1	12	2	2	79.2359	7.64837	21.1764	6.81183	12.0701	5.242	1.91209	0.956046	135.053
5	1	48	3	5	2	1	7	1	2	86.6876	13.552	28.8726	16.4918	55.7136	8.05206	2.48572	1.24286	213.098
5	1	48	3	5	2	1	9	2	2	109.475	17.9737	27.8449	8.72392	28.06	5.079	3.05935	1.52967	201.745
2	1	46	3	5	2	1	13	2	2	12.3748	4.0871	0.358517	28.7531	43.3806	0.284663	0.573628	0.573628	90.3861
2	1	48	3	5	2	1	11	2	2	35.3876	3.82419	13.8627	10.4448	44.5518	3.56056	1.14726	0.573628	113.352
2	1	45	3	5	2	2	9	2	2	59.7775	48.0366	9.72449	6.16275	47.9429	2.9136	0.9373	0.9373	176.433
2	1	47	3	5	2	1	13	2	2	64.4535	6.74013	3.94369	9.48876	26.1718	4.11387	1.33846	0.884343	117.135
2	1	45	3	5	2	2	3	1	2	71.5837	11.0784	6.01065	6.2935	35.1446	2.46979	1.88569	0.942847	135.409
2	1	48	3	5	2	1	13	2	2	81.8132	10.1102	33.8201	8.70002	36.4493	3.33087	1.91209	0.956046	177.092
2	1	46	3	5	2	2	5	1	2	89.8627	10.1592	16.877	11.6206	16.7591	3.16608	1.50855	0.754277	150.707
2	1	46	3	5	2	1	5	1	2	102.12	58.8447	4.54122	14.7709	39.9149	6.99515	1.33846	1.33846	229.863
2	1	47	3	5	2	1	9	2	2	124.757	16.8503	3.70468	25.1679	40.632	9.71582	2.86814	1.43407	225.13
2	1	45	3	5	2	1	8	2	2	75.591	10.1102	2.62913	8.93903	35.7561	2.65136	1.91209	0.956046	138.545
2	2	48	3	4	2	2	6	1	2	36.1814	7.7093	19.9176	10.404	35.055	4.09108	1.49968	0.74984	115.608
2	2	48	3	4	2	1	13	2	2	88.5055	10.1102	18.4039	4.1588	37.2619	4.27544	1.72088	0.860442	165.297
2	2	45	3	4	2	2	7	1	2	119.438	6.7017	5.6238	2.71817	24.6744	6.59953	2.43698	0.913868	169.107
2	2	47	3	4	2	1	10	2	2	133.424	20.2204	26.6498	12.9544	49.2603	9.27078	3.63298	1.81649	257.23
5	1	46	3	4	2	1	22	4	2	56.7643	7.86348	18.5473	10.7077	40.4886	5.86056	1.33846	0.669232	142.24
5	2	47	3	2	2	2	15	3	2	39.9079	8.45914	14.2001	9.13868	41.2881	4.97261	1.49968	0.74984	120.216
5	2	47	3	2	2	2	9	2	2	128.781	49.2083	45.3419	5.53007	36.4376	3.22759	3.93666	1.96833	274.431
2	2	46	3	2	2	2	9	2	2	9.07986	7.80303	13.1456	0.304623	39.1792	0.306732	1.68714	0.84357	72.3497
2	2	48	3	2	2	2	9	2	2	73.4044	7.7093	12.3021	6.23305	27.6738	4.01446	1.49968	0.74984	133.587
2	2	48	3	2	1	1	4	1	2	80.914	10.1102	20.6745	3.63298	38.9589	10.3999	1.72088	0.860442	167.272
2	2	47	3	2	2	1	13	2	2	81.1177	16.0138	6.83573	17.9976	27.5341	7.40697	2.67693	1.33846	160.921
2	2	46	3	2	2	1	14	2	2	117.092	5.78408	2.1511	3.22666	9.89508	0.608285	2.1033	1.05165	141.912
6	1	45	3	2	2	1	6	1	2	52.8373	6.38161	15.1772	9.29755	28.6814	3.91597	1.33846	0.669232	118.299
5	1	47	3	2	2	1	10	2	2	76.9947	10.1102	9.20195	30.8325	55.4746	7.03316	1.72088	0.860442	192.228
2	1	46	3	2	2	2	10	2	2	49.5471	6.60797	6.23305	5.45977	29.8764	1.83523	1.31222	0.65611	101.528
2	1	46	3	2	2	2	5	1	2	58.5428	7.7093	11.8568	8.34197	46.5604	2.37582	1.49968	0.74984	137.637
2	1	46	3	2	2	2	7	1	2	59.8736	12.1146	1.17163	3.93666	36.3204	1.83851	2.06206	1.03103	118.348
2	1	46	3	2	2	2	6	1	2	64.4959	8.01392	1.17163	2.8822	51.6921	2.19469	1.12476	1.12476	132.7
2	1	47	3	2	2	2	13	2	2	87.7847	11.0133	34.3286	5.92842	27.6738	3.02373	1.8746	0.9373	172.565
2	1	48	3	2	2	2	8	2	2	87.9804	7.7093	15.5826	4.7568	39.3666	5.34753	1.49968	0.74984	162.993
2	1	46	3	2	2	1	8	2	2	88.9847	6.7017	3.16339	9.34957	16.7074	0.572222	2.24952	1.12476	128.853
2	1	47	3	2	2	2	9	2	2	95.3063	14.3173	11.0133	7.28751	39.5072	8.85796	2.43698	1.49968	180.226
2	1	48	3	2	2	1	13	2	2	99.0825	17.7108	31.191	10.1819	66.4452	8.90031	2.48572	2.48572	238.483
5	2	45	3	1	2	2	3	1	2	13.7793	5.50664	16.2153	2.41355	27.3926	0.309309	0.9373	0.9373	67.4913
5	2	48	3	1	2	2	4	1	2	91.9499	16.5199	27.2989	23.4559	106.524	5.93171	2.8119	1.61684	276.109
2	2	45	3	1	3	2	8	2	2	184.5	17.6915	19.3318	44.5686	29.9233	10.6363	3.18682	1.59341	311.431
6	1	46	3	1	2	2	15	3	2	98.3931	19.8239	9.16211	27.5801	48.9739	4.01352	3.37428	1.68714	213.008
5	1	47	3	1	2	2	15	3	2	49.5576	5.67067	21.4642	2.50728	38.4527	2.19492	2.06206	1.03103	122.941
5	1	45	3	1	2	2	2	1	2	51.8022	7.7093	18.746	29.9936	24.2761	4.01633	1.49968	0.74984	138.793
5	1	45	3	1	2	2	29	5	2	52.8248	4.49904	26.6193	6.67827	48.7396	3.12355	1.12476	1.12476	144.734
5	1	46	3	1	2	2	14	2	2	66.3388	10.1931	15.5826	13.4034	30.1108	5.6149	1.68714	0.84357	143.774
5	1	46	3	1	2	1	9	2	2	71.9325	11.2335	17.3283	11.5204	27.7253	4.64973	1.91209	0.956046	147.258
5	1	47	3	1	2	1	21	3	2	84.8169	8.98684	1.19506	19.2882	40.2974	7.58169	2.29451	1.14726	165.608
2	1	46	3	1	2	2	9	2	2	15.3607	2.34325	0	0.0702975	2.22609	3.23978	0.18746	0.09373	23.5213
2	1	45	3	1	2	2	10	2	2	40.826	12.1146	12.0677	4.66307	49.0911	5.56475	2.06206	1.03103	127.42
2	1	45	3	1	2	2	7	1	2	50.6735	3.30398	28.9626	0.984165	44.967	3.50714	0.74984	0.37492	133.523
2	1	47	3	1	2	2	8	2	2	52.0563	7.7093	4.80366	14.9968	32.3837	7.03046	1.31222	1.9449	122.237
2	1	46	3	1	2	1	15	3	2	55.2349	8.98684	26.6498	5.11485	31.43	2.80313	1.52967	0.764837	132.514
2	1	47	3	1	2	1	14	2	2	62.8084	6.81183	2.39012	3.53737	43.6674	2.78592	1.14726	0.932145	124.08
2	1	47	3	1	1	2	10	2	2	74.0606	9.91195	16.309	5.24888	29.8764	5.09727	1.68714	1.68714	143.878
2	1	48	3	1	2	1	10	2	2	134.074	12.3569	13.289	3.03545	54.399	7.10103	2.29451	1.14726	227.697
2	1	47	3	1	2	2	8	2	2	151.116	15.4186	12.5364	15.3952	29.3141	8.03524	2.8119	1.40595	236.033
2	2	48	3	2	2	2	13	2	2	17.5282	3.79607	3.39771	1.92147	12.6301	1.23325	0.56238	0.257758	41.327
5	1	48	3	5	2	2	19	3	2	105.103	8.81062	18.582	6.16275	60.6433	1.4008	1.49968	0.74984	202.952
2	1	48	3	5	2	2	9	2	2	27.9983	6.60797	60.8074	7.61557	24.9791	1.56881	1.12476	0.56238	131.264
2	1	48	3	5	2	2	16	3	2	0	0	22.6124	0.351488	53.4261	0.718909	0.18746	0.09373	77.3901
2	1	48	3	5	2	2	7	1	2	102.45	22.0266	27.0645	10.4275	21.7688	4.63518	3.7492	1.8746	193.996
5	2	49	3	4	2	1	15	3	2	78.0516	6.1904	27.1278	108.846	47.5872	9.65177	1.33846	1.33846	280.132
2	2	49	3	5	2	1	16	3	2	75.389	12.3569	22.3715	6.2382	34.5372	3.91692	2.1033	1.05165	157.965
2	2	49	3	5	2	1	7	1	2	123.677	12.0462	23.0646	19.6946	19.1448	7.50903	2.48572	1.24286	208.864
5	1	49	3	5	2	1	15	3	2	30.8401	5.61677	1.31456	2.82034	9.56046	4.58807	0.956046	0.478023	56.1744
5	1	49	3	5	2	1	22	4	2	36.8032	12.3569	21.272	12.1896	23.6621	4.26229	2.1033	2.1033	114.753
5	1	49	3	5	3	1	9	2	2	68.8898	7.93519	25.5742	9.08244	33.1031	3.59784	1.52967	0.764837	150.477
2	1	49	3	5	2	1	15	3	2	16.347	8.1742	35.7322	54.5663	62.1669	1.10854	1.14726	1.14726	180.39
2	1	49	3	5	2	1	10	2	2	45.6868	7.86348	29.5179	6.42941	34.2026	2.75437	1.33846	0.669232	128.462
2	1	49	3	5	2	1	9	2	2	52.6911	6.74013	16.9698	2.65303	51.1485	2.62005	1.14726	0.573628	134.543
5	1	49	3	1	2	1	16	3	2	21.3117	4.0871	1.19506	1.07555	26.0523	0.681661	0.573628	0.286814	55.2638
5	2	49	3	5	2	1	10	2	2	61.9468	8.98684	12.5481	6.2143	21.8457	4.69299	1.52967	1.52967	119.294
2	2	49	3	5	2	2	11	2	2	80.2856	8.81062	17.4338	3.84293	53.4027	0.655642	1.49968	0.74984	166.681
5	1	50	4	5	2	1	11	2	2	42.8218	6.74013	25.8133	3.82419	53.5625	5.05127	1.33846	0.669232	139.821
5	1	50	4	5	2	1	4	1	2	56.504	5.97529	13.3846	9.63217	27.4624	4.09355	1.14726	0.573628	118.773
5	1	50	4	5	2	1	13	2	2	66.7808	8.3176	33.2465	3.20276	40.0583	6.78172	1.91209	0.956046	161.256
5	1	50	4	5	2	1	9	2	2	86.5217	16.8503	7.05084	37.8833	20.7223	8.34915	3.05935	1.91209	182.349
2	1	49	3	5	2	1	13	2	2	47.2963	6.74013	8.86733	3.84809	17.9498	2.00818	1.14726	0.573628	88.4307
2	1	50	4	5	1	1	9	2	2	102.035	15.727	12.7871	17.3761	33.1748	7.11753	2.86814	1.43407	192.52
2	1	50	4	5	2	1	8	2	2	134.993	12.2374	25.5742	27.821	26.0523	8.25331	3.25056	1.62528	239.807
5	2	49	3	5	2	1	5	1	2	73.2268	7.7093	7.73273	10.2869	47.2399	2.85502	1.31222	0.65611	151.019
1	1	49	3	5	2	2	8	2	2	735.646	10.6852	35.6174	100.783	13.2159	17.5156	2.24952	5.6238	921.337
2	2	49	3	4	2	2	8	2	2	70.1626	8.81062	21.9328	8.67003	40.2102	5.56756	1.68714	0.84357	157.885
2	2	50	4	4	2	1	12	2	2	88.6594	10.1102	17.3283	12.2852	33.5094	3.37269	1.91209	0.956046	168.133
2	2	49	3	2	2	2	8	2	2	93.1438	9.4433	23.4325	6.44394	16.5199	3.65617	1.68714	0.84357	155.17
5	1	49	3	2	2	1	24	4	2	246.486	40.1165	1.17163	9.30271	47.2165	9.80932	4.6865	2.34325	361.132
2	1	50	4	2	1	1	9	2	2	46.9835	10.8989	30.474	8.07859	32.8641	3.02445	1.52967	0.764837	134.618
2	1	49	3	2	2	1	12	2	2	70.283	13.3565	17.5744	25.9867	27.9316	3.19713	1.8746	1.8746	162.078
2	1	49	3	2	2	1	8	2	2	150.301	8.24824	26.5959	19.4256	35.6174	3.84762	2.06206	1.03103	247.129
5	1	49	3	1	2	1	4	1	2	52.3383	8.98684	16.0138	4.35001	31.7885	3.47332	1.52967	0.764837	119.245
5	1	50	4	1	2	1	4	1	2	78.6585	0	12.094	0	54.9966	2.62865	0	0	148.378
2	1	49	3	1	2	2	13	2	2	59.9174	9.84165	7.14692	10.9664	40.3039	6.59578	1.31222	0.65611	136.74
1	1	49	3	1	2	2	11	2	2	69.5735	13.3565	42.202	20.5034	34.3755	3.48582	1.8746	1.8746	187.246
5	1	50	4	5	2	2	6	1	2	64.3159	6.60797	14.1767	10.8727	21.8157	4.42804	1.31222	0.65611	124.185
5	2	50	4	5	2	1	9	2	2	44.5133	5.61677	20.2204	4.37391	33.2226	2.21229	0.956046	0.956046	112.071
2	1	50	4	5	2	1	10	2	2	28.6312	10.1102	15.4162	1.9838	31.5495	2.91068	1.91209	0.956046	93.4698
2	1	50	4	5	2	1	6	1	2	94.8274	13.0739	21.6305	16.3484	33.7484	6.03265	2.1033	1.05165	188.816
2	2	50	4	4	2	2	10	2	2	32.9363	6.67827	2.46041	4.66307	36.3673	4.80788	1.12476	0.56238	89.6003
2	2	50	4	4	2	2	5	1	2	65.3849	7.7093	22.2843	6.11589	24.1355	3.0399	1.49968	0.74984	130.919
2	1	50	4	4	2	1	9	2	2	70.3414	8.98684	8.00689	15.5358	26.6259	2.88917	1.72088	0.860442	134.967
5	1	50	4	2	2	2	6	1	2	103.21	9.91195	20.0348	7.14692	18.2071	4.9855	1.8746	0.9373	166.308
2	2	50	4	1	3	2	7	1	2	10.7349	5.50664	20.0348	1.42938	29.0563	1.50202	0.9373	0.46865	69.67
5	1	50	4	1	2	1	7	1	2	176.709	25.8372	44.9342	13.2173	80.6903	8.92422	4.39781	4.39781	359.108
2	1	50	4	1	2	1	11	2	2	30.9042	7.7093	7.99049	7.99049	24.5807	2.30482	1.31222	0.65611	83.4483
2	1	50	4	1	2	2	7	1	2	76.2787	8.81062	5.38948	4.94426	46.7713	6.69771	1.49968	1.85117	152.243
2	1	50	4	1	2	2	11	2	2	86.7734	12.1146	23.2216	15.7466	26.385	6.31694	2.24952	1.12476	173.932
2	2	50	4	5	2	2	4	1	2	75.4581	9.91195	1.17163	13.9892	23.5497	4.91895	1.8746	0.9373	131.811
2	1	50	4	5	2	2	6	1	2	66.9438	8.86276	15.6748	3.41782	46.9302	4.91459	1.69712	0.848562	149.29
5	1	51	4	5	2	2	11	2	2	31.0771	4.40531	16.8714	3.49144	44.5452	1.85796	0.74984	0.37492	103.373
5	1	51	4	5	2	2	16	3	2	141.923	12.0209	18.8632	5.20202	80.3735	4.68486	1.68714	1.68714	266.442
5	1	88	7	1	2	1	21	3	2	68.9164	8.45914	13.0753	10.3103	26.7131	4.6387	1.68714	0.84357	134.644
2	2	29	1	5	2	1	4	1	2	73.7786	6.1187	33.7245	5.18655	38.1224	3.32919	1.72088	0.860442	162.841
2	1	28	1	5	2	2	10	2	2	176.262	17.6212	34.563	17.2229	64.1348	5.96896	3.18682	1.59341	320.553
5	2	22	1	6	2	2	17	3	2	27.3186	8.01392	9.95882	5.27231	71.4926	0.299467	1.12476	1.12476	124.605
2	2	26	1	5	2	2	9	2	2	67.9437	7.7093	36.6953	10.0057	41.1709	5.10852	1.49968	0.74984	170.883
2	1	28	1	2	2	2	13	2	2	77.7409	8.81062	5.97529	5.67067	45.0139	2.63217	1.68714	0.84357	148.374
5	1	32	2	5	2	2	9	2	2	87.3428	28.0487	1.17163	30.556	34.4458	3.2126	3.93666	1.96833	190.683
2	1	33	2	5	2	2	16	3	2	65.6328	32.8055	12.0912	77.3038	42.202	35.8799	2.62444	2.62444	271.164
6	2	39	2	5	2	1	8	2	2	62.8479	8.81062	13.38	8.90435	52.7466	2.82971	1.68714	0.84357	152.05
1	2	34	2	5	2	1	11	2	2	7.92515	5.44946	52.9411	21.0569	37.0468	1.65731	0.764837	0.382419	127.224
5	2	37	2	2	2	2	9	2	2	57.147	7.7093	24.0418	3.79607	47.9429	4.59418	1.31222	0.65611	147.2
2	2	36	2	2	2	2	8	2	2	70.3758	9.91195	10.2166	9.84165	35.1722	4.48826	1.8746	0.9373	142.818
5	1	40	3	2	2	2	11	2	2	113.837	11.0133	22.6124	27.3926	40.2102	3.50339	1.8746	0.9373	221.38
5	1	40	3	2	2	2	10	2	2	182.705	11.2476	43.7251	8.74033	59.8935	11.0993	2.8119	2.8119	323.034
2	1	34	2	2	2	2	6	1	2	24.1296	5.50664	30.6966	8.95122	34.4458	1.82586	0.9373	0.46865	106.962
2	1	39	2	2	2	2	14	2	2	57.3729	8.81062	20.5034	5.67067	42.7643	3.5676	1.68714	0.84357	141.22
2	1	38	2	2	2	2	15	3	2	64.1561	12.1146	33.2742	16.2153	30.6029	6.41957	2.06206	1.03103	165.876
2	1	36	2	2	2	2	10	2	2	67.3373	11.0133	22.6124	7.82646	40.0696	4.54872	1.8746	1.8746	157.157
2	1	39	2	2	2	2	6	1	2	85.8612	9.91195	15.3483	12.6301	25.5414	4.71532	1.8746	0.9373	156.82
2	1	39	2	2	2	2	9	2	2	134.035	9.91195	14.2001	1.99176	44.428	3.42068	1.8746	0.9373	210.8
2	1	34	2	2	2	2	8	2	2	151.735	14.3173	14.6453	18.4883	18.1602	7.67977	2.62444	1.31222	228.962
2	2	50	4	5	2	1	9	2	2	36.5327	3.37006	12.5481	1.52967	11.6399	2.45082	0.573628	0.286814	68.9317
5	1	49	3	5	2	1	8	2	2	27.439	31.3344	22.7061	21.0091	37.3336	6.87923	4.39781	2.19891	153.298
5	1	50	4	5	2	1	11	2	2	40.652	5.61677	23.0646	5.25826	25.7894	2.09016	1.14726	0.573628	104.192
5	1	45	3	5	2	2	7	1	2	83.5869	12.2099	12.1391	5.49208	35.616	9.71415	2.63997	1.31999	162.718
5	1	46	3	5	2	2	12	2	2	109.633	11.5757	10.6618	167.988	36.3204	0.399524	2.43698	2.43698	341.452
5	1	51	4	5	2	1	3	1	2	112.639	13.6954	35.8756	17.9259	34.9196	7.23679	2.48572	1.24286	226.021
5	1	49	3	5	2	2	12	2	2	155.632	22.0031	52.0202	42.9284	93.3786	5.53734	3.37428	2.99936	377.873
5	1	46	3	5	2	1	7	1	2	161.825	20.8896	17.7825	268.769	28.3468	1.83322	4.39781	4.39781	508.242
5	1	47	3	5	2	2	11	2	2	308.595	17.8087	13.8252	280.932	22.9639	3.18542	3.7492	3.7492	654.809
5	1	48	3	5	2	2	12	2	2	457.362	24.184	41.9567	150.243	73.4525	331.965	5.09137	15.3684	1099.62
2	1	49	3	5	2	1	8	2	2	55.0047	10.1102	15.6792	10.1819	30.1155	5.74536	1.91209	0.956046	129.705
2	1	44	3	5	2	2	8	2	2	65.328	12.092	32.6696	24.6083	47.7787	3.39425	1.69712	1.69712	189.265
2	1	43	3	5	2	1	11	2	2	67.9223	8.98684	24.7377	10.2775	25.6937	5.65812	1.72088	0.860442	145.858
2	1	48	3	5	2	2	11	2	2	73.4539	8.86276	20.4598	7.5192	41.9331	0.930118	1.50855	0.754277	155.422
2	1	49	3	5	2	2	13	2	2	80.9115	11.1539	4.80366	20.6909	30.4623	7.01148	1.8746	0.9373	157.846
2	1	43	3	5	2	1	8	2	2	85.9271	12.3569	15.6792	10.4926	33.2226	3.53259	2.1033	1.05165	164.366
2	1	45	3	5	2	2	10	2	2	127.622	98.6977	13.4737	5.06142	43.2564	4.06835	2.24952	1.12476	295.554
2	1	48	3	5	2	2	13	2	2	158.41	24.0418	4.24128	41.5224	20.4097	19.494	3.37428	5.06142	276.555
6	1	50	4	5	2	2	12	2	2	145.696	17.6212	30.3685	10.5446	79.0847	9.42713	2.99936	2.99936	298.741
5	1	42	3	5	2	2	9	2	2	0	1.33565	37.6092	5.03799	47.8258	1.25481	0.18746	0.09373	93.3446
5	1	50	4	5	2	2	13	2	2	91.9916	15.2311	20.5034	11.5054	20.5269	4.26308	2.43698	1.21849	167.677
2	1	49	3	5	2	1	6	1	2	193.89	20.2204	79.3519	12.5481	83.917	8.18758	3.44177	2.29451	403.851
2	1	46	3	5	2	2	14	2	2	203.481	12.4661	0.702975	193.248	1.52311	1.60466	2.62444	2.62444	418.275
2	2	49	3	4	2	2	8	2	2	55.9086	7.7093	26.9708	15.2311	17.9493	2.25585	1.49968	0.74984	128.274
1	2	50	4	4	2	2	14	2	2	67.4746	12.513	26.3616	16.9651	23.3153	6.73263	2.24952	1.12476	156.737
2	1	50	4	4	2	1	7	1	2	147.552	15.4186	29.7593	42.8581	24.1355	8.44953	2.8119	1.40595	272.391
6	2	49	3	3	2	2	9	2	2	108.19	16.6177	12.257	3.81853	41.1553	7.07465	2.82854	1.41427	193.356
6	1	46	3	3	2	2	14	2	2	125.6	18.6991	70.8833	38.5465	57.4331	8.17373	2.62444	2.62444	324.585
2	2	44	3	2	2	2	6	1	2	109.357	20.2926	12.1849	18.0196	65.1658	10.4877	3.37428	1.68714	240.569
6	1	45	3	2	2	2	9	2	2	49.9778	8.81062	21.7922	6.18618	48.4116	3.00452	1.49968	0.74984	140.432
6	1	44	3	2	2	2	10	2	2	62.5022	16.3325	8.31854	19.8708	45.2482	6.95711	2.8119	1.40595	163.447
5	1	50	4	2	2	2	7	1	2	20.9653	10.4743	29.5484	8.06078	31.8448	2.24858	1.68714	0.84357	105.673
5	1	47	3	2	2	1	5	1	2	32.8913	14.247	2.10893	211.338	15.4655	1.25598	2.99936	2.99936	283.305
5	1	45	3	2	2	2	10	2	2	49.7378	4.40531	0.702975	16.8011	31.8916	2.4801	0.74984	0.37492	107.144
5	1	46	3	2	2	2	12	2	2	124.11	12.138	8.67003	146.383	0	1.27262	2.62444	2.62444	297.822
5	1	48	3	2	2	2	9	2	2	151.18	19.0741	0.702975	229.1	37.0234	0.856224	4.12412	4.12412	446.184
2	1	47	3	2	2	1	7	1	2	35.6627	15.4401	0.717035	218.624	1.55358	0.732332	3.25056	3.25056	279.231
2	1	42	3	2	2	2	7	1	2	57.1355	15.4186	1.64028	9.56046	28.2362	3.22666	2.62444	2.62444	120.467
2	1	43	3	2	2	2	8	2	2	87.8644	8.24824	28.0253	14.1767	40.3039	7.01522	2.24952	1.12476	189.008
2	1	45	3	2	2	2	12	2	2	90.3977	8.24824	27.6504	8.92779	34.5864	4.41	2.06206	1.03103	177.314
2	1	49	3	2	2	2	6	1	2	95.0373	12.1146	27.5332	4.70993	62.2367	3.89776	2.06206	1.03103	208.623
2	1	49	3	2	2	1	10	2	2	112.03	13.4803	0.358517	19.7185	31.7407	7.28244	2.48572	1.24286	188.339
2	1	44	3	2	2	1	8	2	2	118.39	16.5199	26.385	19.9645	39.8118	8.19716	2.8119	1.40595	233.486
2	1	43	3	2	2	1	8	2	2	373.921	25.3774	35.2894	93.73	88.528	8.24239	3.56174	3.56174	632.211
5	2	50	4	1	2	1	16	3	2	65.5311	8.81062	19.8473	14.9734	32.3603	3.78294	1.49968	0.74984	147.555
5	2	40	3	1	2	2	13	2	2	106.183	11.0836	66.5483	9.5136	50.6142	4.50748	1.8746	1.49968	251.825
6	1	47	3	1	2	2	18	3	2	150.316	16.9183	3.51488	222.093	5.74096	1.6213	3.56174	3.56174	407.328
5	1	49	3	1	2	1	12	2	2	34.8699	6.74013	23.8056	5.25826	61.3543	3.59306	1.14726	1.14726	137.916
5	1	50	4	1	2	1	13	2	2	59.448	11.0133	10.1931	4.6865	25.9867	3.07575	1.8746	0.9373	117.215
5	1	41	3	1	2	2	9	2	2	72.6701	11.0133	24.8385	24.815	23.1982	6.49057	2.06206	1.03103	166.119
5	1	45	3	1	2	2	24	4	2	101.666	6.74856	19.3553	5.92842	44.7561	2.64319	1.68714	0.84357	183.628
5	1	50	4	1	2	2	10	2	2	111.988	13.2159	23.784	5.13172	54.3869	3.78622	2.43698	1.21849	215.948
5	1	49	3	1	2	2	10	2	2	118.496	12.1146	33.4148	20.8784	61.5572	6.07628	2.06206	1.03103	255.63
5	1	49	3	1	2	1	11	2	2	134.125	8.1503	26.4108	19.4794	58.2232	5.44564	2.1033	1.05165	254.989
5	1	49	3	1	2	2	7	1	2	145.679	12.1146	13.3565	10.7087	45.5294	5.9467	2.24952	1.33565	236.92
5	1	46	3	1	2	2	11	2	2	175.395	15.1374	0.702975	215.884	5.85813	1.03665	3.18682	3.18682	420.388
5	1	48	3	1	2	2	25	4	2	246.096	17.8087	5.38948	259.867	22.8701	1.49617	3.7492	3.7492	561.025
5	1	50	4	1	2	2	10	2	2	253.921	34.1412	33.9068	35.8986	86.1379	21.6629	5.81126	2.90563	474.386
2	1	45	3	1	2	2	13	2	2	28.658	9.34957	22.9639	20.3629	20.6675	2.23827	1.31222	0.65611	106.208
2	1	43	3	1	2	2	17	3	2	37.6504	6.67827	24.0183	49.0208	51.6921	1.99247	0.9373	0.18746	172.177
2	1	45	3	1	2	1	11	2	2	74.095	11.4965	0.358517	12.9544	27.9883	8.25594	2.48572	1.24286	138.877
2	1	49	3	1	2	2	16	3	2	81.452	11.0784	17.5605	7.94348	58.7158	3.47298	1.88569	0.942847	183.052
2	1	50	4	1	2	2	12	2	2	104.981	11.0133	22.6124	2.7416	61.5103	3.89214	1.8746	0.9373	209.563
2	1	49	3	1	2	2	13	2	2	125.895	16.8011	10.1931	22.1906	33.2507	9.04354	2.8119	1.40595	221.592
2	1	47	3	1	2	1	15	3	2	130.197	16.0278	7.84989	219.281	45.7168	1.41204	3.37428	3.37428	427.234
2	1	46	3	1	3	2	11	2	2	143.964	10.6852	0.702975	141.204	4.92083	0.934723	2.24952	2.24952	306.911
5	1	51	4	2	2	1	20	3	2	68.6558	6.88353	17.5913	9.34535	39.9627	4.30555	1.33846	0.669232	148.752
5	2	53	4	5	2	2	11	2	2	48.0376	6.67827	13.5909	4.42874	33.7662	3.01811	0.9373	0.9373	111.394
5	1	54	4	5	2	1	9	2	2	80.2637	10.1102	26.0523	6.45331	45.7707	2.29356	1.72088	0.860442	173.525
5	1	52	4	5	2	2	9	2	2	102.103	11.0133	24.9556	14.0829	18.1368	6.41067	2.06206	1.03103	179.795
5	1	55	4	5	2	2	15	3	2	114.817	11.0133	42.3425	5.01456	80.8422	5.04549	1.8746	1.8746	262.824
5	1	51	4	5	2	2	11	2	2	154.225	155.826	80.725	13.1456	84.6195	51.301	3.56174	8.90435	552.308
4	1	55	4	5	2	1	6	1	2	57.7474	8.98684	14.4841	14.8426	22.9451	4.85624	1.91209	0.956046	126.73
3	1	51	4	5	2	1	11	2	2	90.0887	19.4077	51.746	2.43792	59.0598	5.19085	1.91209	0.956046	230.799
2	1	53	4	5	2	2	13	2	2	19.5556	8.81062	1.17163	0.140595	43.3736	2.6863	1.49968	0.74984	77.9878
2	1	52	4	5	2	1	10	2	2	51.9647	7.86348	10.3014	12.3569	13.9822	4.45852	1.52967	0.764837	103.222
2	1	56	4	5	2	1	8	2	2	92.3096	20.4833	2.0316	12.1657	52.0089	7.74876	3.63298	1.81649	192.197
2	1	55	4	5	2	2	9	2	2	127.602	15.5098	8.03777	18.5741	54.8265	8.99853	2.63997	1.31999	237.509
2	1	53	4	5	2	2	7	1	2	186.435	9.34957	29.6421	33.7897	49.138	10.9055	1.31222	1.96833	322.54
1	2	54	4	5	2	2	7	1	2	75.4044	7.7093	14.6453	4.78023	34.1177	4.94238	1.31222	0.65611	143.568
5	1	53	4	5	2	2	11	2	2	162.203	10.404	31.2824	43.0924	59.1202	15.9212	2.24952	2.24952	326.523
1	1	54	4	5	1	1	10	2	2	75.7215	8.98684	20.9135	7.91128	18.1649	3.9456	1.72088	0.860442	138.225
5	2	55	4	4	2	1	19	3	2	71.3722	8.98684	2.62913	12.4525	27.7014	3.27255	1.72088	0.860442	128.996
3	2	54	4	4	2	2	13	2	2	55.4594	7.7093	10.4275	9.16211	25.2134	4.77039	1.49968	0.74984	114.992
2	2	54	4	4	2	2	7	1	2	50.8914	6.60797	20.2691	1.47625	37.7498	2.24155	1.31222	0.65611	121.204
2	2	55	4	4	2	2	9	2	2	62.51	4.40531	24.9322	8.52943	24.6041	3.26345	0.9373	0.46865	129.65
2	2	54	4	4	2	2	11	2	2	84.1229	15.4186	23.8309	18.8397	30.6966	7.77631	2.8119	2.15579	185.653
2	1	55	4	4	2	2	9	2	2	49.2134	4.49904	32.3603	6.5611	39.8821	3.80216	1.12476	0.56238	138.005
2	1	55	4	4	2	1	23	4	2	55.6998	9.91195	20.7378	5.67067	29.8764	2.68677	1.68714	0.84357	127.114
2	1	51	4	4	2	2	11	2	2	82.6915	30.1811	28.4705	9.25584	36.6016	5.79955	2.43698	1.40595	196.843
2	1	55	4	4	2	2	12	2	2	165.384	19.8239	24.0183	8.99808	78.1709	6.28554	3.37428	1.68714	307.742
5	1	55	4	3	2	2	9	2	2	155.675	18.7226	24.2526	9.30271	77.7022	9.90633	3.18682	1.59341	300.342
2	2	51	4	2	2	2	11	2	2	44.2186	13.2862	31.3058	15.1843	38.1013	4.64315	2.24952	2.24952	151.238
2	2	53	4	2	2	2	7	1	2	64.4931	6.74856	15.3717	9.32614	29.8764	4.66776	1.68714	1.0779	133.249
2	2	54	4	2	2	2	8	2	2	64.5762	9.91195	16.2856	15.5592	33.5085	5.91554	1.8746	0.9373	148.569
5	1	55	4	2	2	1	13	2	2	74.6555	21.0893	35.43	6.65483	53.4496	5.00378	1.8746	0.9373	199.095
3	1	52	4	2	1	2	11	2	2	115.341	13.8486	56.8238	41.3115	63.2678	9.44072	2.43698	1.21849	303.689
2	1	51	4	2	2	2	13	2	2	2.87517	1.73401	6.44394	0.796705	36.9062	1.91865	0.37492	0.18746	51.2371
2	1	51	4	2	2	2	8	2	2	77.8468	8.81062	22.0266	4.35845	51.2235	4.31533	1.49968	1.49968	171.581
2	1	54	4	2	2	2	8	2	2	80.4035	14.7625	12.7707	22.0734	27.1583	8.05047	2.06206	1.73401	169.015
2	1	52	4	2	2	1	3	1	2	101.213	15.4401	43.6196	208.179	53.4669	54.6113	3.25056	4.87584	484.656
2	1	55	4	2	2	1	4	1	2	160.616	16.5199	25.8929	6.91259	64.8143	9.3477	2.99936	1.78087	288.883
2	2	52	4	1	2	1	15	3	2	98.9228	9.08244	3.22666	91.3263	16.0855	31.801	1.91209	2.86814	255.225
6	1	52	4	1	2	2	11	2	2	84.1834	12.1146	8.6466	10.0057	23.9246	6.68904	2.06206	1.03103	148.657
5	1	51	4	1	2	2	21	3	2	57.0832	4.45218	19.9176	49.8409	41.9676	7.76975	0.9373	1.40595	183.375
5	1	54	4	1	4	2	13	2	2	84.0662	8.81062	0	17.9727	10.5446	5.13922	1.49968	1.31222	129.345
5	1	54	4	1	2	1	6	1	2	107.865	12.3569	14.6036	17.0176	21.9891	6.81398	2.1033	2.1033	184.853
5	1	56	4	1	2	1	9	2	2	109.195	6.88353	36.2342	4.89974	52.8455	6.1806	1.72088	1.72088	219.68
2	1	55	4	1	2	1	12	2	2	15.8204	2.79644	10.9945	3.99149	27.0083	1.13076	0.573628	0.478023	62.7936
2	1	53	4	1	2	2	8	2	2	59.2763	8.01392	11.2476	1.8746	45.6231	2.59773	1.12476	0.56238	130.32
2	1	56	4	4	2	1	8	2	2	62.4709	8.00689	15.8943	7.83958	32.1471	4.55437	1.52967	0.764837	133.208
2	2	56	4	4	2	1	5	1	2	216.922	28.0839	20.316	32.4817	64.0551	13.5883	4.97144	2.48572	382.904
5	2	57	4	1	2	2	13	2	2	149.849	81.4045	62.8811	36.6953	48.1772	7.01663	2.8119	2.8119	391.648
5	2	57	4	4	2	2	4	1	2	42.9684	6.60797	61.979	5.64723	57.9017	4.74415	1.31222	0.65611	181.817
2	1	58	4	4	2	1	14	2	2	145.033	17.6212	48.271	9.91195	72.0784	12.9676	2.99936	1.71057	310.593
2	2	60	5	5	2	2	9	2	2	59.1729	30.72	18.1602	285.619	0.820138	1.15265	4.31158	4.31158	404.268
2	2	60	5	5	2	2	9	2	2	162.637	16.6177	26.989	17.5605	48.8159	7.70871	3.01711	1.50855	284.854
5	1	60	5	5	2	2	8	2	2	180.722	15.5098	35.946	23.2412	37.2896	8.25226	2.82854	1.41427	305.203
2	1	60	5	5	2	2	8	2	2	135.811	19.7055	12.7284	265.859	14.402	2.86272	4.14852	4.14852	459.666
2	2	60	5	4	2	2	6	1	2	44.0782	9.91195	28.4236	3.60861	71.8909	1.11164	1.68714	1.8746	162.587
2	2	60	5	4	2	2	11	2	2	244.791	16.0278	0.702975	211.994	4.92083	2.02668	3.37428	3.37428	487.211
5	1	60	5	4	2	2	10	2	2	21.698	168.714	82.5996	10.943	42.8815	0.134503	1.49968	2.99936	331.47
5	1	60	5	4	2	2	16	3	2	97.6915	11.0133	22.6124	8.10765	53.4261	4.47491	1.8746	1.8746	201.075
2	2	61	5	4	2	2	7	1	2	120.953	12.5833	21.3002	6.7017	123.419	2.52438	1.68714	1.68714	290.855
2	1	61	5	4	2	2	10	2	2	87.5033	11.0133	16.7777	13.2159	19.777	4.92575	2.06206	1.03103	156.306
5	2	61	5	4	2	2	11	2	2	68.6964	7.7093	40.4679	10.9195	46.0917	5.62966	1.49968	1.49968	182.514
5	1	62	5	4	2	1	12	2	2	64.7867	10.1102	16.3723	14.0539	31.0715	2.65255	1.72088	0.860442	141.628
2	1	62	5	4	2	1	11	2	2	219.666	25.4786	47.6828	196.874	26.4586	16.5327	4.97144	4.97144	542.635
2	2	62	5	1	2	2	9	2	2	210.406	19.6833	11.8334	132.722	63.174	3.07786	2.62444	2.62444	446.146
2	2	62	5	4	2	2	9	2	2	49.3646	1.33565	9.67763	23.9012	0	35.2619	0	0	119.541
2	1	62	5	5	2	2	8	2	2	0.737306	2.21569	12.6577	0	0	0.847148	0.377139	0.188569	17.0236
2	2	63	5	4	2	1	13	2	2	0	0.812639	1.88819	2.1511	0	0	0.382419	0.191209	5.42556
2	1	63	5	4	2	2	6	1	2	153.202	20.0348	39.2495	18.91	53.6839	7.49465	2.8119	1.40595	296.793
2	1	63	5	4	2	2	11	2	2	57.0537	8.81062	31.5167	10.2869	34.4458	4.41539	1.68714	0.84357	149.06
2	1	63	5	1	2	2	6	1	2	90.3944	11.0133	21.0893	5.6941	39.5072	8.61051	1.8746	0.9373	179.121
2	1	64	5	4	2	1	6	1	2	70.2075	9.91195	23.4325	7.80303	39.7415	5.25216	1.8746	0.9373	159.161
5	1	64	5	5	2	2	11	2	2	178.371	45.1779	58.4641	13.3097	74.656	7.80115	3.93666	3.93666	385.653
2	1	65	5	4	2	1	8	2	2	112.24	13.4803	3.58517	3.65688	134.253	1.41495	2.29451	1.14726	272.071
5	2	66	5	5	2	1	15	3	2	100.888	10.1102	5.40166	4.1588	42.4485	4.20995	1.72088	0.860442	169.798
4	1	65	5	5	2	2	10	2	2	131.124	11.0133	7.52184	11.4116	73.1563	8.02423	2.06206	1.03103	245.344
5	2	65	5	4	2	2	24	4	2	132.526	19.8239	30.6029	15.8404	58.5578	8.69299	3.56174	1.78087	271.386
5	2	65	5	4	2	2	10	2	2	210.21	18.6991	47.9429	180.43	51.8093	5.25169	2.62444	2.8119	519.78
2	1	66	5	4	2	1	13	2	2	118.686	8.81062	19.3553	2.13236	38.2184	2.95531	1.49968	0.74984	192.408
2	1	66	5	4	2	1	8	2	2	139.27	14.6688	0.702975	29.0094	30.2045	7.09161	2.62444	1.31222	224.884
2	1	66	5	4	2	2	10	2	2	112.237	11.7163	49.5598	18.2539	56.5661	4.58785	2.06206	1.40595	256.389
2	2	68	5	5	2	1	12	2	2	41.2464	16.1684	25.682	1.14819	53.9182	2.90797	2.8119	2.8119	146.695
2	2	68	5	4	2	2	6	1	2	98.2194	13.2941	26.9183	17.9848	30.1711	5.83551	2.4514	1.2257	196.1
2	2	68	5	4	2	2	8	2	2	100.775	9.30271	26.8302	18.043	30.0873	10.5453	2.06206	2.71817	200.364
5	1	68	5	4	2	2	8	2	2	195.515	24.3698	70.4147	43.3033	113.671	9.44564	4.12412	4.12412	464.968
2	1	68	5	4	2	2	6	1	2	102.169	16.4028	17.8087	5.24888	69.5243	3.40638	1.31222	1.31222	217.185
2	1	68	5	4	2	1	18	3	2	119.3	15.727	23.0646	22.6583	39.7237	8.68281	2.67693	2.67693	234.51
1	1	68	5	4	2	2	11	2	2	200.997	20.9252	30.9309	7.31094	68.1886	6.99953	3.56174	3.56174	342.475
3	2	68	5	2	2	2	12	2	2	182.246	23.081	32.3603	12.6301	69.3837	14.9153	3.7492	3.7492	342.114
3	2	70	6	4	2	1	14	2	2	57.6018	6.38161	22.1086	5.44946	35.8278	2.4415	1.33846	1.24286	132.392
2	2	70	6	4	2	2	9	2	2	64.2768	8.20138	15.3483	31.3293	31.259	11.1227	1.31222	1.96833	164.818
2	2	70	6	4	2	1	9	2	2	68.3078	7.09864	35.0391	3.25056	46.5117	3.14969	1.33846	0.669232	165.365
2	2	70	6	4	2	2	17	3	2	248.693	15.4186	32.9227	38.1247	28.7517	6.2143	2.8119	1.40595	374.343
2	1	70	6	5	2	2	8	2	2	141.177	14.1427	44.1959	6.43493	23.5712	3.819	2.26283	1.13142	236.735
2	2	70	6	4	2	2	10	2	2	368.162	28.7568	97.5846	95.6282	85.964	87.7262	5.46851	4.83209	774.123
2	2	73	6	4	2	1	7	1	2	139.885	22.5388	58.1993	167.762	44.6952	9.92806	4.39781	4.39781	451.804
2	2	73	6	5	2	1	12	2	2	61.8662	8.98684	30.3784	7.28985	33.3421	5.37179	1.52967	1.52967	150.295
5	1	73	6	4	2	2	24	4	2	52.6184	7.02975	19.6833	8.01392	26.8537	5.05697	0.9373	1.40595	121.599
2	2	73	6	5	2	2	7	1	2	64.7924	11.0784	23.2647	21.1433	33.4946	6.99144	2.07426	1.03713	163.876
2	2	73	6	5	2	2	17	3	2	361.158	17.6212	14.411	14.1767	18.1368	1.59622	2.99936	2.99936	433.099
5	2	73	6	4	2	2	15	3	2	324.421	17.8087	4.56934	202.433	51.9499	7.91339	3.56174	3.56174	616.22
2	2	73	6	4	2	2	20	3	2	29.4312	6.67827	7.17035	2.43698	17.7853	0.837009	1.12476	0.56238	66.0263
2	2	73	6	4	2	2	10	2	2	431.576	20.6206	12.0677	200.559	29.8764	6.16345	4.12412	4.12412	709.112
5	1	73	6	4	2	2	16	3	2	51.5461	11.0836	24.3698	3.70234	70.2038	1.07274	1.8746	1.8746	165.728
2	1	73	6	4	2	2	12	2	2	309.623	18.6991	56.6129	59.1905	71.6097	6.62273	2.62444	2.62444	527.607
5	2	73	6	4	2	2	4	1	2	68.816	4.64352	39.5996	5.18566	58.2208	5.3193	0.754277	1.24927	183.788
2	1	73	6	4	2	2	7	1	2	105.608	7.75491	11.432	12.5163	39.7174	2.95865	1.50855	0.754277	182.25
2	1	73	6	4	1	2	6	1	2	63.2735	9.9706	31.7032	8.06134	34.7675	3.79826	1.88569	0.942847	154.403
5	2	74	6	4	2	1	14	2	2	93.6557	10.397	14.6992	5.18655	34.6567	9.49736	2.29451	2.74863	173.136
2	2	74	6	4	2	1	12	2	2	88.3267	6.88353	3.46567	11.6877	58.1993	5.4411	1.72088	2.39012	178.115
2	1	74	6	4	2	1	10	2	2	420.343	20.6909	22.9404	242.573	59.6357	9.47798	4.12412	4.54591	784.331
2	2	74	6	4	2	2	14	2	2	64.0211	9.91195	19.8239	3.16339	42.9049	5.14016	1.8746	0.9373	147.777
5	1	74	6	4	2	2	25	4	2	56.949	9.91195	12.1849	8.15451	38.4527	3.42958	1.8746	0.9373	131.895
5	1	74	6	4	2	2	9	2	2	106.505	8.81062	18.5351	5.41291	58.7219	5.93499	1.49968	0.74984	206.17
5	1	75	6	4	2	1	16	3	2	118.381	7.64837	11.8311	20.1487	30.3784	0.121896	1.91209	0.956046	191.378
5	1	74	6	4	2	2	14	2	2	159.01	15.4186	38.4879	24.4167	61.44	8.18357	2.8119	1.40595	311.174
4	1	74	6	4	2	2	22	4	2	93.9452	11.8327	22.7462	10.5835	35.121	5.01359	2.26283	1.13142	182.636
6	2	75	6	3	2	1	14	2	2	59.9152	7.86348	17.0176	12.2135	31.9319	5.06752	1.33846	0.669232	136.017
5	1	74	6	3	2	2	9	2	2	64.0825	8.81062	21.2064	10.8024	21.7219	6.93649	1.68714	0.84357	136.091
5	1	74	6	2	2	2	16	3	2	133.505	11.0784	37.4782	19.8233	45.8695	5.08713	1.88569	0.942847	255.671
3	2	75	6	4	2	1	17	3	2	96.0236	5.35386	32.1471	1.31456	32.5056	1.04783	1.33846	0.669232	170.4
2	2	75	6	4	2	2	6	1	2	222.8	16.4731	5.97529	130.285	28.7048	1.87155	3.56174	3.56174	413.233
2	2	75	6	4	2	2	17	3	2	224.09	14.739	33.6257	197.911	34.9144	1.54983	3.18682	3.18682	513.203
5	1	75	6	4	2	1	11	2	2	110.271	14.1495	27.0083	186.286	43.6196	1.97208	3.05935	3.05935	389.425
5	2	75	6	1	2	2	23	4	2	138.6	15.6061	5.97529	211.103	37.0234	1.17467	3.37428	3.37428	416.231
5	1	76	6	4	2	1	12	2	2	18.9517	4.49342	50.9095	1.91209	54.9966	2.22854	0.764837	0.382419	134.639
5	1	76	6	5	2	1	9	2	2	55.162	2.86814	3.22666	5.35386	2.50962	4.32802	0.382419	0.573628	74.4043
5	1	77	6	4	2	2	13	2	2	419.369	23.7137	39.1557	31.3996	106.524	34.7954	5.43634	7.02975	667.423
2	1	77	6	4	2	1	13	2	2	78.2765	5.78408	2.50962	8.05469	34.2982	2.20536	1.33846	1.33846	133.805
2	1	80	7	4	2	2	9	2	2	35.1185	3.30398	10.779	1.56998	29.0563	1.30519	0.56238	0.28119	81.9765
2	1	80	7	4	2	2	7	1	2	273.9	9.95882	51.5515	198.38	36.1329	1914.17	2.43698	1.54655	2488.08
2	2	80	7	5	2	2	6	1	2	88.9976	11.8799	17.4427	10.442	41.9567	7.19958	2.26283	2.26283	182.444
2	2	80	7	4	2	2	20	3	2	89.3662	13.2159	16.309	10.0994	33.6022	5.10173	2.24952	2.24952	172.194
2	2	80	7	4	2	2	8	2	2	155.018	16.6177	7.07135	4.66709	49.9944	5.976	2.82854	2.82854	245.001
5	1	81	7	4	2	2	17	3	2	78.0195	8.81062	36.789	2.55414	46.1855	4.09366	1.49968	0.74984	178.702
5	1	81	7	4	2	2	11	2	2	281.37	22.4952	56.1209	81.9201	71.8675	72.6389	2.99936	4.49904	593.911
5	1	92	8	4	2	2	20	3	2	133.346	17.3635	40.5382	100.619	50.4033	16.7559	2.43698	3.65547	365.119
2	2	40	3	2	2	1	24	4	2	44.1397	40.2257	32.3861	183.609	42.807	32.2343	5.35386	8.38931	389.145
2	1	52	4	5	2	2	7	1	2	138.643	17.7255	31.5854	10.3242	99.7296	9.49069	3.01711	1.50855	312.024
2	1	51	4	5	2	2	10	2	2	141.002	16.6177	1.29641	12.3277	28.6625	4.685	3.01711	1.50855	209.117
2	2	69	5	4	2	1	14	2	2	90.7384	15.727	39.0784	8.96293	48.3281	5.4552	2.67693	1.33846	212.305
2	2	63	5	4	2	1	3	1	2	103.847	10.1102	10.397	5.04314	49.7383	7.08239	1.72088	0.860442	188.8
5	1	63	5	4	2	1	10	2	2	208.744	31.4539	20.6745	57.4584	43.4045	9.21653	5.35386	2.67693	378.983
2	1	55	4	4	2	2	4	1	2	63.0229	13.2159	21.9328	15.114	69.8523	5.06775	2.24952	1.12476	191.58
5	2	40	3	3	2	1	13	2	2	102.686	8.24824	35.2659	5.34261	40.9132	4.52622	2.06206	1.03103	200.075
5	1	64	5	2	2	2	14	2	2	231.176	18.746	40.796	13.6846	82.623	19.2899	2.99936	2.27295	411.588
5	2	87	7	4	2	2	19	3	2	232.146	11.3142	51.9744	12.752	69.5349	24.5395	2.82854	3.46496	408.555
5	2	60	5	5	2	1	8	2	2	74.895	8.98684	22.3715	15.3445	38.8633	6.41651	1.72088	0.860442	169.459
2	1	60	5	4	2	1	19	3	2	66.6974	6.74013	37.6443	2.0077	55.4746	2.20082	1.14726	0.573628	172.486
6	2	64	5	4	2	2	9	2	2	49.1759	6.46737	18.5117	2.43698	66.8764	4.89411	1.49968	1.64028	151.502
1	2	64	5	4	2	2	9	2	2	5.40072	2.06206	0	1.17163	26.5959	0.356174	0.74984	0.74984	37.0862
2	1	64	5	4	2	2	7	1	2	106.898	12.1849	21.2064	28.7751	23.3153	3.06732	1.8746	0.9373	198.259
2	2	64	5	2	2	2	8	2	2	45.6761	8.81062	10.8961	7.07662	64.3925	0.983228	1.49968	0.74984	140.085
2	1	40	3	2	2	2	16	3	2	58.933	15.4186	9.84165	4.63964	16.1919	8.78883	2.62444	1.21849	117.657
2	1	41	3	2	2	2	13	2	2	57.0514	1.78087	28.1424	26.8068	31.5402	6.77504	0.37492	0.56238	153.034
2	2	67	5	4	2	2	8	2	2	43.8863	17.6212	26.8302	2.99936	55.91	4.10256	2.99936	1.49968	155.849
2	1	50	4	5	2	1	9	2	3	92.1251	6.81183	90.6332	20.5311	44.002	3.86099	0.956046	0.478023	259.398
2	1	65	5	4	2	1	13	2	3	41.5978	5.06705	15.1772	3.25056	79.4714	10.3021	1.52967	1.14726	157.543
2	2	65	5	4	2	1	11	2	3	9.62514	4.40531	15.278	0.820138	63.5724	0.782412	0.74984	0.37492	95.6082
2	2	65	5	5	2	1	11	2	3	63.3995	9.373	15.3483	15.5826	31.7511	2.78941	1.68714	0.84357	140.775
2	2	65	5	4	2	2	8	2	3	48.5704	10.6852	26.6193	9.34957	35.8752	5.93358	1.49968	0.74984	139.283
5	2	66	5	4	2	1	9	2	3	61.2618	4.58902	49.9534	7.31375	21.1525	3.2104	1.33846	0.669232	149.489
5	2	66	5	4	2	1	13	2	3	231.773	18.8341	47.6828	60.8763	39.2935	25.6455	3.05935	1.52967	428.695
2	1	66	5	4	2	1	10	2	3	74.6763	6.69232	24.8572	6.40551	43.2611	13.2618	1.52967	0.764837	171.449
2	1	66	5	5	2	1	10	2	3	106.913	8.98684	25.9328	18.2127	30.2589	7.55659	1.52967	0.764837	200.155
5	2	66	5	4	2	1	23	4	3	96.0275	9.56046	23.1363	23.2678	44.9581	9.96798	1.72088	1.72088	210.36
5	2	66	5	4	2	1	22	4	3	104.691	11.4487	14.6992	12.1657	19.6946	6.6885	1.91209	0.956046	172.256
5	2	66	5	4	2	1	4	1	3	110.066	14.6275	7.83958	6.71623	39.5803	2.02491	2.29451	1.14726	184.296
2	1	66	5	4	2	1	5	1	3	24.9908	0.956046	8.2698	4.37391	74.5238	0.958198	0.764837	0.382419	115.22
2	1	56	4	2	2	1	11	2	3	325.325	31.4539	29.016	10.8511	108.965	11.5058	5.35386	3.53737	526.009
2	1	67	5	4	2	1	7	1	3	47.2337	7.17035	17.3283	6.38161	52.4869	2.80528	1.33846	0.669232	135.414
5	2	67	5	4	2	1	11	2	3	94.2212	11.2335	15.5358	2.77253	58.1037	4.19465	1.91209	0.956046	188.93
5	1	67	5	4	2	1	26	4	3	243.508	15.5358	41.6119	19.3121	24.3075	9.93476	2.67693	2.67693	359.564
1	2	67	5	5	2	1	9	2	3	99.6559	20.7462	28.5619	28.8248	32.2905	54.1086	3.44177	3.34616	270.976
5	1	67	5	5	2	1	15	3	3	39.5335	5.97529	14.9382	6.81183	29.5179	3.39396	1.14726	0.573628	101.892
5	2	67	5	4	2	1	11	2	3	218.497	26.4319	30.6029	31.7979	49.6301	12.0895	4.6865	4.6865	378.422
4	2	67	5	1	2	1	18	3	3	191.797	21.8696	16.6113	11.9745	54.9966	17.8272	4.01539	2.22281	321.315
5	1	73	6	4	2	2	9	2	3	316.271	23.3119	56.2172	91.8333	122.264	20.1418	4.9028	4.71423	639.656
6	2	74	6	3	2	1	20	3	3	220.194	23.8295	31.191	50.79	42.0899	12.687	4.01539	4.01539	388.812
5	1	82	7	4	2	1	23	4	3	1054.63	69.17	128.851	235.116	334.592	29.642	11.0901	9.27365	1872.36
5	2	83	7	4	2	1	22	4	3	162.543	12.8349	47.7545	12.8588	86.8568	7.32905	0.956046	1.91209	333.045
4	1	75	6	5	2	1	16	3	3	65.28	6.1187	13.7432	5.18655	35.3498	4.10479	1.72088	0.860442	132.364
2	2	75	6	4	2	1	6	1	3	154.36	16.8503	33.2465	20.7701	60.2548	8.96533	3.05935	1.52967	299.036
5	2	57	4	5	2	1	17	3	3	219.42	13.0739	70.9864	13.552	34.2265	6.58023	2.67693	1.91209	362.428
2	1	63	5	4	2	2	7	1	3	214.15	248.385	47.568	25.8461	102.634	8.99457	3.7492	3.7492	655.076
2	2	45	3	5	2	2	3	1	3	15.0955	5.50664	16.4262	1.0076	52.7231	0.806547	0.9373	0.9373	93.4402
2	2	45	3	5	2	2	2	1	3	99.4354	15.5805	20.5305	13.2706	24.9854	4.9754	2.63997	1.31999	182.738
5	1	51	4	5	2	2	12	2	3	187.144	15.4186	13.4737	22.8936	21.4407	8.23442	2.8119	1.40595	272.823
2	1	67	5	4	2	2	7	1	3	139.332	12.8227	29.2518	9.75846	50.2301	5.51683	2.07426	2.16855	251.155
6	2	65	5	3	2	2	10	2	3	109.527	13.2159	36.8125	8.78719	60.8308	5.00893	2.24952	2.24952	238.681
5	1	65	5	3	2	2	8	2	3	136.723	16.5199	42.2957	11.3648	65.1658	6.21899	2.8119	1.40595	282.506
5	2	69	5	4	2	2	12	2	3	226.94	37.9607	3.28055	174.807	10.1931	71.9284	5.06142	12.0209	542.192
5	1	85	7	1	2	2	22	4	3	35.7428	4.63964	14.6453	2.83533	29.7124	3.80966	1.12476	0.56238	93.0723
5	1	85	7	1	2	2	19	3	3	45.0324	14.3173	19.2147	13.1925	27.6504	6.50533	2.43698	2.43698	130.786
5	1	86	7	1	2	2	16	3	3	131.048	14.3173	31.0715	6.60797	66.8998	7.06818	2.43698	1.21849	260.668
5	1	86	7	1	2	2	15	3	3	141.228	33.0164	38.9448	9.95882	86.6066	8.26605	2.62444	2.62444	323.27
5	1	86	7	1	2	2	14	2	3	311.594	40.96	0.351488	94.8079	0	16.9096	3.37428	5.90499	473.902
5	2	86	7	4	2	2	16	3	3	120.957	8.81062	34.0006	17.2932	58.0423	5.91015	1.49968	1.03103	247.544
5	1	86	7	5	2	2	23	4	3	126.956	15.2311	23.6668	16.8245	39.0386	8.68081	2.43698	1.31222	234.147
5	2	86	7	4	2	2	15	3	3	41.9367	4.40531	20.5034	3.58517	38.5699	3.38037	0.74984	0.74984	113.881
5	2	86	7	4	2	2	16	3	3	55.2473	7.7093	37.8435	7.87332	22.4952	4.84936	1.31222	1.31222	138.642
5	2	86	7	4	2	2	17	3	3	73.6254	9.91195	41.4052	9.5839	49.4426	4.42359	1.68714	0.84357	190.923
5	1	86	7	4	2	2	15	3	3	67.394	8.81062	21.7922	7.47497	24.5807	4.10256	1.49968	0.84357	136.498
5	1	86	7	4	2	2	17	3	3	209.448	23.1279	40.2102	14.0829	92.1366	11.3425	3.93666	3.93666	398.222
5	1	86	7	1	2	2	16	3	3	179.808	19.8239	37.328	8.45914	77.4679	7.13754	3.37428	3.37428	336.773
2	1	58	4	5	2	2	8	2	3	212.901	24.2292	45.6934	18.582	91.7383	21.2898	4.12412	4.21785	422.776
2	2	58	4	4	2	2	26	4	3	48.0821	10.0525	17.4807	2.08549	48.4116	3.06825	1.68714	0.84357	131.711
2	2	58	4	4	2	2	10	2	3	111.17	14.3876	17.8087	10.24	38.8277	5.73112	2.43698	1.21849	201.821
2	2	58	4	4	2	1	9	2	3	158.188	9.91195	22.4952	10.4743	43.9594	3.77123	1.8746	0.9373	251.612
5	1	58	4	4	2	2	9	2	3	89.164	9.91195	14.2001	5.90499	43.5142	5.30231	1.68714	0.84357	170.528
2	1	58	4	4	2	2	10	2	3	121.302	15.4186	22.6124	8.38884	78.0537	6.95946	2.62444	1.31222	256.672
5	2	58	4	3	2	1	16	3	3	88.6691	12.1146	14.7625	11.2945	25.8929	7.44451	2.06206	2.06206	164.302
2	1	58	4	2	2	1	10	2	3	96.0803	11.0133	5.97529	8.506	34.188	3.24259	1.8746	1.8746	162.755
2	1	58	4	2	2	2	7	1	3	115.967	12.1146	33.3913	40.6085	29.3375	6.70521	2.24952	1.12476	241.498
2	1	58	4	1	2	2	19	3	3	62.4929	12.1146	27.2989	8.5763	31.8682	3.9854	2.06206	1.03103	149.429
2	1	58	4	1	2	2	10	2	3	88.7602	13.2159	5.97529	14.0829	27.416	4.04867	2.24952	1.68714	157.436
2	2	59	4	4	2	1	10	2	3	58.4814	8.98684	20.9613	7.95909	24.1402	6.19661	1.52967	0.764837	129.02
5	2	59	4	1	2	1	14	2	3	97.8329	13.4803	15.1772	8.07859	52.7738	8.34915	2.29451	2.29451	200.281
2	1	59	4	1	2	1	11	2	3	151.153	15.727	63.3381	13.5042	37.2141	9.74259	2.67693	1.33846	294.694
2	1	59	4	4	2	1	7	1	3	0	1.10133	1.17163	0.257758	49.466	0.215579	0.18746	0.09373	52.4935
2	1	59	4	1	2	1	8	2	3	86.1192	11.0133	36.6953	4.6865	51.6687	6.86901	1.8746	1.10133	200.028
5	2	60	5	5	2	1	23	4	3	66.5561	10.1819	32.6251	11.9984	29.6374	6.51474	1.72088	1.72088	160.955
5	2	59	4	4	2	2	10	2	3	0	5.34261	103.455	0.773273	95.2063	10.9355	0.74984	1.8746	218.337
5	2	59	4	4	2	2	11	2	3	52.6653	4.40531	0	3.21025	28.9391	3.72952	0.9373	0.74984	94.6366
5	2	60	5	4	2	1	23	4	3	95.635	12.3569	7.40936	17.6391	38.3614	7.2356	2.29451	1.14726	182.079
5	2	59	4	4	2	2	13	2	3	115.043	11.0133	22.9639	13.7783	97.3152	6.12338	2.06206	1.03103	269.33
6	1	59	4	4	2	2	24	4	3	33.4642	7.75491	15.0855	7.47206	23.8069	2.58293	1.50855	0.754277	92.4294
5	1	59	4	4	2	2	17	3	3	52.6611	7.7093	16.5434	7.02975	20.5034	2.73504	1.49968	0.74984	109.431
5	1	59	4	4	2	2	9	2	3	75.8899	13.2159	6.09245	21.4642	41.0069	8.13999	2.24952	1.12476	169.184
5	1	59	4	4	2	2	16	3	3	128.07	13.3565	29.6656	4.7568	37.492	3.92963	1.8746	1.8746	221.02
2	1	59	4	4	2	2	10	2	3	57.2348	8.81062	18.3008	19.8473	47.7555	5.74893	1.49968	0.74984	159.948
2	1	59	4	4	2	2	7	1	3	91.3828	9.9706	22.6519	4.66709	58.3622	5.91707	1.69712	1.90926	196.558
2	1	59	4	4	2	2	10	2	3	151.941	12.1146	7.02975	30.7435	65.8688	6.44253	2.24952	1.12476	277.515
2	1	59	4	2	2	2	10	2	3	19.7639	4.8271	2.34325	3.18682	38.1013	3.35928	0.74984	0.585813	72.9173
2	1	60	5	4	2	1	13	2	3	208.626	20.7223	26.4108	14.0778	89.5815	7.25233	3.44177	3.44177	373.555
2	2	60	5	1	2	2	12	2	3	53.0725	15.7701	0	52.7466	10.076	20.3172	2.62444	2.62444	157.231
5	2	60	5	1	2	2	10	2	3	263.836	16.0278	23.7371	121.38	65.2595	4.5834	2.24952	2.24952	499.323
2	1	60	5	4	2	2	16	3	3	83.7112	21.019	2.46041	115.85	11.974	3.97814	3.37428	4.12412	246.491
5	1	61	5	4	2	1	10	2	3	69.8839	11.2335	32.7446	8.70002	52.0089	4.44227	2.1033	1.05165	182.168
2	1	61	5	4	2	1	10	2	3	110.546	10.5404	38.4809	7.73203	38.1941	1.05237	1.72088	1.72088	209.988
5	1	61	5	4	2	1	9	2	3	300.775	87.5499	44.7191	3.53737	80.3318	12.3048	1.72088	2.58133	533.52
2	1	61	5	4	2	1	8	2	3	155.517	19.8141	14.3407	41.6836	31.7168	19.5832	3.25056	3.46567	289.371
2	1	61	5	4	2	1	16	3	3	157.489	17.0654	3.10715	50.5032	32.4578	17.0026	2.86814	1.72088	282.214
2	1	61	5	4	2	1	7	1	3	75.7292	8.07859	12.4286	4.46952	54.5424	2.13605	1.33846	1.33846	160.061
2	2	61	5	1	2	1	12	2	3	85.5124	27.2712	0	97.445	0	42.4635	4.2066	4.78023	261.679
2	1	61	5	2	2	2	11	2	3	417.726	26.4319	31.0481	32.8758	49.7004	9.97381	4.6865	2.34325	574.785
3	2	62	5	4	2	1	17	3	3	49.0734	7.86348	7.28985	6.28601	23.3275	2.36645	1.52967	0.764837	98.5012
2	1	62	5	4	2	2	10	2	3	198.038	31.6808	19.8005	112.148	40.2805	67.5522	5.24888	5.24888	479.997
5	2	62	5	4	2	2	10	2	3	286.319	11.7163	25.5414	62.7054	77.8428	20.6785	1.8746	1.8746	488.553
2	1	62	5	5	2	2	13	2	3	147.713	16.2153	75.1012	79.5534	51.903	37.9916	3.18682	1.59341	413.258
5	2	63	5	4	2	1	13	2	3	178.792	19.097	22.0608	11.7116	82.1483	13.0878	3.25056	3.25056	333.399
2	1	63	5	5	2	1	11	2	3	36.5138	20.1009	0	11.5443	0	6.78363	3.25056	3.25056	81.4437
2	2	63	5	4	2	1	7	1	3	32.9356	2.24671	0	0.382419	0	0	0.382419	0.191209	36.1383
5	1	63	5	4	2	1	8	2	3	62.7234	11.0133	21.2064	11.107	44.1703	5.51789	2.06206	1.03103	158.831
5	1	63	5	4	2	2	9	2	3	193.923	16.1919	34.6801	8.31854	79.5299	7.68586	2.62444	2.06206	345.015
2	2	63	5	4	2	2	7	1	3	68.9421	23.5712	0	78.7041	7.49563	32.3444	3.77139	1.88569	216.714
5	2	64	5	4	2	1	9	2	3	28.4431	5.6238	5.50664	49.1614	33.6022	0.586047	0.74984	1.21849	124.892
2	2	64	5	4	2	2	8	2	3	210.328	9.77136	26.1272	35.7346	19.7302	1.35815	1.31222	1.8043	306.166
5	1	64	5	4	2	2	12	2	3	68.9002	12.1146	18.746	5.6941	72.7111	0.954406	2.06206	1.03103	182.214
2	2	64	5	4	2	2	9	2	3	320.741	42.0379	18.7694	25.6352	129.043	5.43751	6.74856	3.37428	551.787
2	1	64	5	4	2	2	8	2	3	12.6381	4.40531	23.9012	3.32742	84.6851	1.09008	0.74984	0.37492	131.172
2	2	65	5	5	2	1	10	2	3	41.2587	19.097	47.874	21.5349	88.8645	3.64062	3.25056	1.62528	227.146
2	1	65	5	5	2	1	5	1	3	84.9161	9.91195	11.1304	16.6839	51.2938	3.73327	1.8746	0.9373	180.481
2	1	67	5	5	2	1	9	2	3	131.094	10.1102	14.5797	11.5443	19.8619	3.61672	1.91209	0.956046	193.674
5	2	67	5	5	2	2	5	1	3	261.941	16.5668	39.4838	13.4737	91.5508	12.1854	4.12412	4.12412	443.45
2	1	67	5	4	2	1	7	1	3	96.447	12.1146	22.6124	17.9493	28.3299	8.37197	2.06206	1.03103	188.918
5	1	67	5	4	2	2	9	2	3	67.8481	8.88092	26.1507	10.5446	52.6294	4.03859	1.49968	1.49968	173.092
5	1	67	5	4	2	2	7	1	3	74.6511	17.6212	27.416	13.5909	40.4445	7.42998	2.99936	1.49968	185.653
6	1	67	5	2	2	2	8	2	3	64.9123	9.91195	22.0266	11.2007	48.1538	3.20557	1.68714	0.84357	161.942
5	2	67	5	4	2	2	13	2	3	55.5186	7.77959	31.3058	6.25648	32.6649	3.91885	1.31222	0.65611	139.413
5	2	67	5	4	2	2	15	3	3	78.3553	11.0133	14.8796	6.02216	47.0056	4.10022	1.8746	1.8746	165.125
5	1	67	5	4	2	2	14	2	3	63.7788	9.91195	39.5072	10.2166	33.0867	4.43484	1.68714	0.84357	163.467
5	1	67	5	4	2	2	14	2	3	82.7367	9.91195	11.2476	13.5674	30.6029	5.41502	1.68714	1.71057	156.879
5	1	68	5	4	2	1	13	2	3	92.1003	10.6121	32.888	10.9706	35.2781	7.65841	1.72088	0.860442	192.089
2	1	68	5	4	2	1	8	2	3	69.7995	8.98684	15.6792	11.377	30.474	5.5171	1.52967	1.52967	144.893
2	2	73	6	5	2	1	12	2	3	135.551	15.1055	67.7598	20.1726	101.46	15.2681	2.48572	2.48572	360.289
2	1	72	6	5	2	2	12	2	3	40.4115	25.6352	0	59.8701	0	42.6795	4.12412	4.12412	176.844
5	2	72	6	4	1	2	14	2	3	294.874	42.2488	50.4502	142.517	98.0416	106.084	6.74856	7.84989	748.814
3	2	72	6	4	2	2	8	2	3	56.4536	4.6865	0.351488	15.4186	18.4648	3.01084	0.74984	0.84357	99.9793
3	2	72	6	4	2	2	16	3	3	103.782	35.3362	6.91259	181.555	1.05446	102.244	5.43634	2.71817	439.039
2	2	72	6	4	2	2	24	4	3	72.764	18.746	0	81.592	0	49.4834	2.99936	4.12412	229.709
5	1	72	6	4	2	2	10	2	3	367.829	26.3381	53.7776	52.5123	162.481	29.4882	5.06142	4.14755	701.635
2	1	73	6	5	2	1	13	2	3	236.957	23.5904	35.8039	12.4286	82.1961	3.90497	4.01539	3.72858	402.625
5	1	73	6	4	2	1	18	3	3	156.066	14.1973	33.4616	32.2427	97.0626	14.1251	2.48572	2.29451	351.935
5	1	73	6	4	2	1	15	3	3	174.2	33.1031	23.9012	18.7863	75.8623	2.55981	5.35386	5.35386	339.121
2	1	73	6	5	2	1	13	2	3	203.7	26.2196	13.9822	135.173	47.7784	143.977	4.2066	4.56512	579.602
2	2	77	6	5	2	1	9	2	3	56.456	10.1102	27.1517	12.1418	41.4924	6.20092	1.72088	0.860442	156.134
5	2	77	6	5	4	2	13	2	3	98.7174	12.1146	20.3863	19.0272	23.6668	4.10889	2.24952	1.12476	181.396
5	2	77	6	4	1	2	3	1	3	114.257	18.7226	1.28879	8.62316	17.8321	1.57513	3.18682	1.59341	167.079
2	2	77	6	4	2	2	9	2	3	159.058	15.1374	25.6586	10.9195	67.2747	6.06574	2.62444	1.31222	288.05
5	1	77	6	4	2	2	11	2	3	44.2511	7.7093	10.0994	8.48257	21.6751	2.83276	1.31222	0.65611	97.0186
5	1	77	6	4	2	2	22	4	3	116.74	16.4028	41.7099	41.3818	39.4838	9.50633	2.62444	2.8119	270.66
5	1	77	6	4	2	2	5	1	3	202.607	12.1146	25.4711	27.8378	32.4775	11.8981	2.24952	1.12476	315.78
5	2	77	6	3	2	2	15	3	3	75.6992	9.98225	15.1374	9.56046	40.4445	4.74063	1.68714	1.68714	158.939
2	2	78	6	4	2	1	17	3	3	80.968	10.1102	21.6545	17.3283	35.0152	5.75516	1.72088	1.91209	174.464
2	2	78	6	4	2	1	6	1	3	108.216	14.6753	16.9937	15.1055	33.9157	11.2677	2.48572	1.24286	203.902
5	1	78	6	4	2	2	13	2	3	138.436	14.5282	1.40595	29.3375	25.1665	11.4313	2.43698	1.21849	223.961
2	2	78	6	5	2	2	18	3	3	87.4846	12.1146	17.8087	8.71689	29.8764	4.11147	2.06206	1.03103	163.206
2	2	78	6	4	2	2	11	2	3	70.402	9.91195	23.8074	9.25584	43.1393	4.48428	1.68714	1.68714	164.375
5	1	78	6	4	2	2	11	2	3	94.7027	12.1146	20.0582	10.5915	42.4597	3.59127	2.06206	1.03103	186.611
3	1	78	6	4	2	2	7	1	3	79.4817	11.0133	15.3717	9.34957	29.8764	4.70712	1.8746	1.8746	153.549
2	2	79	6	5	2	2	25	4	3	186.238	17.7255	41.2495	71.8213	87.5904	9.55528	3.01711	3.01711	420.215
5	2	79	6	5	2	2	21	3	3	501.603	17.7853	25.6586	149.687	40.5851	4.76688	4.6865	4.6865	749.458
6	2	79	6	4	2	2	24	4	3	24.229	5.27994	48.6155	2.9464	34.296	2.56831	1.31999	0.659993	119.915
2	2	80	7	4	2	1	8	2	3	40.0272	8.81062	16.7777	5.13172	50.7314	2.34278	1.49968	0.74984	126.071
2	2	79	6	4	2	1	17	3	3	54.9889	12.3569	17.0893	6.0948	42.1138	1.25266	2.1033	1.05165	137.051
2	2	79	6	4	2	2	8	2	3	85.6735	4.56934	0	36.0392	1.52311	0.946439	1.12476	1.12476	131.001
2	2	80	7	4	2	1	9	2	3	112.798	15.4186	27.416	7.05319	51.8093	5.71472	2.62444	1.31222	224.147
5	1	80	7	4	2	2	12	2	3	67.4613	7.92019	40.0696	2.78847	69.1259	2.72098	1.31222	0.65611	192.055
5	1	80	7	4	2	2	7	1	3	81.9088	11.0133	23.9246	11.4351	25.3071	7.04311	1.8746	1.8746	164.381
5	1	78	6	4	2	2	8	2	3	96.1719	182.774	37.7498	9.06838	86.4894	5.00167	2.24952	1.12476	420.629
5	1	79	6	4	2	2	17	3	3	322.412	26.7131	46.5604	127.285	63.5255	13.9878	3.7492	1.8746	606.108
3	1	79	6	4	2	2	11	2	3	180.885	17.4338	35.7346	30.6263	33.7428	18.066	2.8119	4.92083	324.221
2	1	79	6	4	2	2	8	2	3	4.84491	3.44458	6.44394	2.06206	39.8353	2.61741	0.56238	0.56238	60.3729
2	1	79	6	4	2	1	9	2	3	58.9534	25.0962	179.044	6.62062	93.836	4.27783	0.573628	0.286814	368.688
2	1	79	6	4	2	2	10	2	3	100.967	10.5835	27.4604	7.02421	62.9586	10.4684	1.88569	1.2257	222.573
2	1	80	7	4	2	1	14	2	3	105.531	12.3569	17.3283	19.7902	18.4039	7.87185	2.1033	2.1033	185.488
5	1	80	7	1	2	2	8	2	3	120.474	19.8239	29.4078	23.9949	29.0563	10.532	3.37428	2.24952	238.913
5	2	81	7	4	2	2	4	1	3	76.1615	13.2159	36.8593	11.1773	35.6408	4.4025	2.43698	1.21849	181.113
5	1	82	7	4	2	1	12	2	3	69.414	8.2937	31.0715	4.89974	77.7983	7.21863	1.33846	1.33846	201.373
2	2	82	7	4	2	1	19	3	3	195.015	28.6345	35.3362	16.1919	61.2994	17.4985	4.87396	4.87396	363.723
5	2	83	7	4	2	2	30	5	3	53.5974	7.7093	15.1374	10.6852	41.0303	5.93545	1.49968	0.74984	136.345
2	2	64	5	4	2	2	9	2	3	200.985	98.4165	0	9.04495	85.0366	7.99541	2.24952	2.24952	405.977
5	1	79	6	4	2	2	12	2	3	85.136	11.0784	34.791	7.87277	34.1782	3.7596	1.88569	0.942847	179.645
5	1	67	5	4	2	1	16	3	3	184.606	28.6097	22.1086	29.1355	74.4521	5.76831	4.01539	2.0077	350.704
1	1	51	4	2	2	2	10	2	3	22.9336	4.21785	2.92906	3.04623	54.5977	3.50363	0.56238	0.56238	92.3529
4	1	82	7	1	2	1	22	4	3	0	10.3103	46.5135	3.7492	45.7168	2.83651	3.7492	3.7492	116.625
2	2	68	5	4	3	1	9	2	3	101.168	15.4186	19.2147	15.4186	59.6592	6.94141	2.62444	1.31222	221.758
5	1	85	7	4	2	2	23	4	3	0.0609245	6.60797	11.0133	0.304623	36.6953	0.520905	1.12476	0.56238	56.8902
5	2	86	7	1	2	2	18	3	3	192.697	21.7922	28.822	261.155	67.1341	7.7585	2.99936	2.99936	585.358
5	2	86	7	1	2	2	17	3	3	57.4891	5.50664	19.9176	5.5535	21.5813	2.28701	0.9373	0.46865	113.741
5	2	86	7	1	2	2	21	3	3	277.9	36.5781	28.2362	30.4623	69.4774	19.4326	4.87396	2.43698	469.398
5	1	86	7	1	2	2	14	2	3	67.2274	9.91195	13.7315	46.865	33.6491	6.02309	1.8746	0.9373	180.22
3	1	88	7	4	2	2	10	2	3	48.2232	11.0133	0	6.46737	45.9512	4.03109	2.06206	1.03103	118.779
5	2	32	2	5	2	1	11	2	3	83.584	66.9232	66.8037	13.4325	93.095	7.04033	1.52967	1.52967	333.938
2	1	51	4	1	2	1	7	1	3	109.766	13.2159	21.4407	13.1691	25.3305	4.55575	2.43698	1.21849	191.134
2	1	49	3	5	2	2	5	1	3	13.111	0	2.92906	0.421785	36.1798	0.225889	2.24952	2.24952	57.3665
5	2	29	1	1	2	1	7	1	3	338.765	11.8072	11.114	118.263	22.252	8.87259	2.48572	2.48572	516.045
2	1	30	2	5	2	1	10	2	3	105.448	20.4355	63.2186	10.636	51.9133	10.5997	2.86814	1.43407	266.553
2	1	36	2	5	2	1	8	2	3	125.755	14.6036	84.634	35.8517	79.3758	11.6375	2.67693	1.33846	355.873
2	1	36	2	5	2	1	8	2	3	117.162	14.986	42.066	7.72007	76.1491	7.72151	2.1033	1.05165	268.96
5	1	37	2	1	2	1	15	3	3	105.36	10.3103	14.411	32.0791	23.6668	10.8483	2.06206	1.03103	199.769
2	1	38	2	5	2	1	8	2	3	1.40826	13.6715	5.13875	48.2564	18.1649	5.05366	4.97144	4.97144	101.636
2	1	39	2	2	2	1	9	2	3	87.3525	10.1102	34.2982	11.8072	24.4748	6.07687	1.91209	0.956046	176.988
2	2	41	3	2	2	2	9	2	3	43.1924	4.00696	39.9524	10.8961	21.9328	4.37508	0.56238	0.28119	125.199
5	2	41	3	1	2	2	12	2	3	166.113	147.625	70.6959	8.17795	129.933	12.9975	3.37428	3.37428	542.291
2	1	42	3	2	2	1	11	2	3	59.3508	6.09245	72.055	6.74856	35.6408	3.04154	0.9373	1.21849	185.085
2	1	66	5	1	2	1	11	2	3	33.095	0.597529	14.1614	15.6911	37.6921	60.0956	0.0956046	1.64918	163.078
2	1	68	5	4	2	1	15	3	3	76.8936	6.81183	25.9806	8.1503	29.5179	2.55551	1.33846	0.956046	152.204
2	1	68	5	1	2	2	10	2	3	189.153	19.9411	89.6293	111.375	87.3095	2.4562	4.31158	4.31158	508.487
5	2	72	6	4	2	2	8	2	3	211.852	26.4319	86.6066	86.5597	59.1905	89.0623	4.6865	2.34325	566.733
5	2	73	6	5	2	1	16	3	3	124.194	15.727	61.2109	12.0701	69.2178	11.4936	2.67693	2.67693	299.267
5	1	74	6	4	2	2	8	2	3	222.414	17.012	38.9683	6.72513	56.6129	2.56516	2.8119	1.40595	348.515
2	2	74	6	4	2	2	14	2	3	13.5213	2.20266	11.5991	1.85117	32.7586	1.22927	0.37492	0.56238	64.0994
5	1	75	6	4	2	1	11	2	3	48.352	10.8989	56.0482	33.1031	56.3111	4.14781	1.52967	1.52967	211.921
2	1	77	6	4	2	2	9	2	3	81.6878	12.1146	0.351488	4.03039	54.176	6.79308	2.06206	1.03103	162.246
5	2	78	6	5	2	1	12	2	3	91.3655	8.55662	27.0083	20.1248	0	231.772	3.25056	1.62528	383.703
5	2	78	6	4	2	1	15	3	3	52.2673	7.17035	0	3.77638	0	47.9094	2.86814	1.43407	115.426
5	1	79	6	5	2	1	7	1	3	200.274	22.4671	13.0261	5.06705	55.9048	6.13423	4.01539	2.0077	308.896
5	2	78	6	4	2	1	10	2	3	8.21825	8.81062	44.7795	1.05446	36.4376	2.38871	1.49968	0.74984	103.939
5	2	79	6	4	2	1	13	2	3	29.5697	8.67003	6.91259	11.0836	18.1602	4.3786	1.68714	0.84357	81.3054
5	2	80	7	4	2	1	15	3	3	95.721	8.98684	32.6251	11.1618	46.6312	6.23486	1.72088	0.860442	203.942
5	2	79	6	4	2	1	50	6	3	105.915	10.1102	1.07555	17.7347	15.7987	2.73883	1.91209	0.956046	156.241
5	2	80	7	4	2	2	17	3	3	132.324	17.3635	33.2742	4.28815	70.4381	5.76205	2.43698	1.21849	267.105
5	2	79	6	4	2	2	16	3	3	145.771	9.91195	42.6706	2.78847	32.126	1.75041	1.68714	1.05446	237.76
5	2	78	6	4	2	1	13	2	3	162.88	31.0715	47.6828	11.114	73.4961	5.42461	2.48572	1.24286	335.398
5	2	79	6	4	2	2	17	3	3	177.349	12.513	29.1735	49.6886	77.6553	22.1932	2.43698	1.68714	372.697
5	2	79	6	4	2	1	12	2	3	276.322	12.138	5.97529	133.214	25.0728	1.51421	2.62444	2.62444	459.485
5	2	79	6	4	2	1	16	3	3	397.837	29.7359	36.9062	12.2318	44.0531	8.78016	5.24888	2.62444	537.417
2	2	80	7	4	2	2	10	2	3	52.0025	11.0784	34.3196	12.2334	35.4982	7.60005	1.88569	1.88569	156.504
2	2	79	6	4	2	1	26	4	3	72.5137	13.1456	2.27061	10.2297	39.2218	7.80182	2.1033	1.05165	148.338
2	2	79	6	4	2	1	6	1	3	278.219	16.0278	0	241.402	23.1982	2.49111	3.37428	3.37428	568.086
5	1	79	6	4	2	1	17	3	3	223.361	20.0348	34.3286	6.04559	56.0271	7.26876	2.8119	2.8119	352.689
2	1	79	6	4	2	2	14	2	3	115.746	13.2159	41.9442	2.41355	58.7219	3.72671	2.43698	1.21849	239.424
6	2	81	7	4	2	2	12	2	3	272.689	28.804	34.9089	12.0449	124.055	14.7291	5.09137	2.68711	495.009
5	2	87	7	4	1	1	11	2	3	133.442	11.0133	21.2064	3.21025	41.5927	5.65848	1.8746	0.9373	218.935
5	2	83	7	4	2	1	21	3	3	143.079	14.6036	6.0948	82.7219	27.2473	4.06965	2.48572	1.24286	281.544
2	2	81	7	4	2	2	20	3	3	96.0623	13.2159	25.4477	17.5509	25.0025	5.73651	2.24952	1.12476	186.39
2	2	83	7	4	2	2	11	2	3	125.352	12.1849	14.1767	22.3406	38.0778	6.25812	2.24952	1.12476	221.764
2	2	81	7	4	2	1	14	2	3	174.663	16.8503	101.006	8.48491	49.3798	7.52122	2.86814	1.43407	362.207
5	1	80	7	4	2	2	17	3	3	36.6838	6.64707	5.30351	2.73425	24.3726	1.51775	1.13142	0.659993	79.0504
6	1	44	3	3	2	1	28	4	3	73.8954	9.91195	19.3318	2.13236	40.6788	2.82502	1.68714	0.84357	151.306
2	2	38	2	2	2	2	9	2	3	69.5725	9.91195	22.05	11.0836	25.9867	5.03752	1.8746	0.9373	146.454
1	1	39	2	1	2	2	10	2	3	383.899	24.6041	26.2444	20.2457	164.238	17.4947	3.93666	6.32678	646.99
6	2	41	3	3	2	2	34	5	3	77.1602	7.7093	4.80366	12.3489	19.4724	3.23228	1.31222	0.65611	126.695
5	1	42	3	5	2	1	20	3	3	72.0845	11.2335	12.4286	12.0701	29.6374	6.72196	1.91209	0.956046	147.044
1	1	42	3	5	2	1	24	4	3	88.8669	10.1102	33.7484	6.57282	61.9279	3.9652	1.72088	0.860442	207.773
5	1	42	3	4	2	1	25	4	3	164.7	17.9737	50.3119	24.9289	30.713	7.76955	3.25056	1.62528	301.272
1	1	42	3	5	2	1	19	3	3	102.554	10.5446	19.3553	20.9955	81.8029	6.97117	1.8746	1.28879	245.387
5	1	42	3	5	2	1	22	4	3	363.124	29.9702	59.7529	176.47	49.7004	60.8718	5.6238	3.46801	748.981
5	1	43	3	5	2	1	16	3	3	115.609	13.6237	4.89974	204.427	29.6613	3.23	1.91209	1.91209	375.274
5	1	43	3	4	2	2	23	4	3	167.401	14.739	5.15515	186.64	24.2526	0.756636	3.18682	3.18682	405.318
5	1	43	3	2	2	2	29	5	3	59.1849	12.138	13.5909	128.949	20.0348	0.344458	2.62444	2.62444	239.491
5	1	43	3	2	2	2	24	4	3	237.911	12.138	5.97529	133.214	24.1355	1.31222	2.62444	2.62444	419.935
1	1	43	3	2	2	2	16	3	3	351.684	12.138	3.51488	145.352	0	1.67332	2.62444	2.62444	519.611
1	1	43	3	5	2	2	21	3	3	234.45	13.005	7.02975	165.996	75.2184	0.86091	2.8119	2.8119	502.184
5	1	44	3	5	2	2	17	3	3	161.464	25.3774	0	6.13932	62.682	8.49054	3.56174	4.45218	272.167
6	1	44	3	3	2	2	22	4	3	155.261	22.7061	8.20138	5.60037	50.7548	10.5017	3.18682	3.98353	260.195
2	1	45	3	5	2	1	11	2	3	47.7182	6.74013	26.0523	5.61677	44.0976	2.29834	1.33846	0.669232	134.531
2	1	46	3	4	2	2	9	2	3	251.13	14.6922	27.8847	79.7877	114.749	6.07535	2.06206	2.06206	498.443
2	1	50	4	5	2	1	12	2	3	38.6047	18.6429	3.58517	110.686	20.1248	1.83752	2.48572	2.48572	198.453
2	1	50	4	1	2	1	16	3	3	54.324	10.5404	25.0484	7.00304	76.1491	9.99379	1.72088	0.860442	185.64
5	1	51	4	4	2	2	20	3	3	12.1512	5.17858	13.5909	6.27991	40.796	0.747028	0.9373	0.46865	80.1495
5	1	51	4	4	2	2	15	3	3	69.9664	8.20138	38.0075	11.6225	50.0753	3.31476	1.49968	1.49968	184.187
2	1	50	4	4	2	1	28	4	3	55.7851	5.61677	44.9342	4.1349	25.8372	3.58613	1.14726	0.573628	141.615
2	1	50	4	4	2	2	15	3	3	76.9217	11.7163	12.0677	12.8176	52.5123	1.12499	0.9373	0.46865	168.566
1	1	51	4	4	2	2	6	1	3	129.93	12.1146	36.5547	17.5275	61.6041	5.81197	2.24952	1.12476	266.917
2	1	53	4	1	2	1	10	2	3	78.68	3.37006	54.8532	2.29451	54.8771	2.91021	0.764837	0.382419	198.132
2	1	54	4	4	2	1	12	2	3	115.509	11.0133	0	4.52247	37.6326	4.67057	1.8746	0.9373	176.16
2	1	54	4	5	2	2	21	3	3	273.849	30.72	51.6687	56.8707	80.9593	9.15274	4.31158	4.31158	511.843
5	2	55	4	2	2	1	8	2	3	82.7453	13.4803	32.8163	5.25826	59.3227	4.87225	2.29451	2.29451	203.084
6	1	55	4	3	2	1	6	1	3	36.5712	7.07474	0.358517	16.5396	12.7871	5.59717	1.52967	0.764837	81.2228
5	1	56	4	1	2	1	10	2	3	59.1322	15.4186	21.7922	84.7788	7.02975	7.19167	2.62444	1.31222	199.28
2	1	62	5	5	2	2	15	3	3	181.032	14.411	30.5794	180.993	59.8935	24.5978	2.8119	4.21785	498.536
2	2	57	4	5	2	2	13	2	3	94.8288	13.2159	19.3318	17.1526	34.9144	7.83443	2.24952	2.24952	191.777
5	2	62	5	4	2	1	22	4	3	263.069	26.2196	25.6937	11.6877	73.6395	16.3207	4.2066	7.02694	427.864
1	2	59	4	4	2	2	8	2	3	191.896	15.4186	39.1323	4.79898	59.4483	7.48481	2.62444	2.62444	323.427
5	1	59	4	4	2	2	18	3	3	222.162	16.0278	0.702975	216.962	43.4907	1.62294	3.37428	5.06142	509.404
5	1	61	5	4	2	2	11	2	3	237.401	24.0418	8.20138	314.769	26.6193	1.72815	5.06142	5.06142	622.883
2	1	56	4	4	2	2	9	2	3	48.9722	11.7856	34.2018	4.40781	51.998	2.40567	0.942847	0.942847	155.657
2	1	58	4	4	2	2	16	3	3	101.7	9.91195	31.2824	3.35085	71.5395	5.96896	1.68714	1.96833	227.409
2	1	60	5	4	2	2	7	1	3	139.066	19.5896	0.702975	253.985	1.52311	1.22037	4.12412	4.12412	424.335
2	1	57	4	4	2	2	8	2	3	199.639	14.739	55.5585	150.202	54.9727	24.6695	3.18682	4.78023	507.749
2	1	62	5	4	2	2	8	2	3	230.3	20.0348	2.8119	121.638	47.4743	2.11314	2.8119	2.8119	429.996
2	1	60	5	4	2	2	14	2	3	273.724	19.7055	0.707135	256.525	15.8398	2.03466	4.14852	4.14852	576.833
2	1	61	5	4	2	1	14	2	3	357.333	21.3704	0.702975	289.532	18.3008	2.20031	4.49904	4.49904	698.438
5	1	60	5	3	1	1	7	1	3	77.4825	17.6869	11.3531	213.461	56.0004	1.22685	3.82419	3.82419	384.859
5	1	58	4	1	2	1	5	1	3	44.6987	16.5199	10.8961	3.63204	69.8289	6.08636	2.8119	2.8119	157.286
5	1	58	4	1	2	2	7	1	3	184.956	27.3223	20.9721	86.5597	38.1013	67.0929	3.93666	4.49904	433.44
5	1	58	4	1	2	2	6	1	3	189.514	0.636421	69.0871	4.19567	56.8301	9.32475	2.82854	3.25282	335.669
2	2	64	5	4	2	2	8	2	3	122.566	14.3173	30.017	2.62444	57.9486	3.77146	2.43698	2.43698	236.119
5	2	65	5	4	2	1	14	2	3	39.4668	114.726	13.1934	3.94369	63.6249	6.8484	1.14726	1.14726	244.097
2	2	65	5	4	2	2	8	2	3	225.266	20.9252	27.7675	22.8701	53.2152	8.45726	3.7492	3.7492	365.999
1	2	66	5	5	2	2	9	2	3	176.764	22.0266	19.0975	19.3787	61.4166	9.0897	3.93666	1.96833	313.678
2	2	67	5	4	2	2	5	1	3	33.5579	4.6865	11.2476	10.5681	50.4971	2.97546	0.9373	0.9373	115.407
2	2	39	2	5	2	2	27	4	3	240.809	11.5757	22.6124	128.246	38.7105	5.10969	2.43698	2.43698	451.937
2	1	51	4	5	2	2	11	2	3	109.155	250.728	8.55287	9.11525	92.3944	8.99574	3.56174	3.56174	486.065
1	2	50	4	4	2	2	15	3	3	88.9915	12.138	10.4275	9.41987	47.8258	8.87553	2.62444	1.31222	181.615
2	1	47	3	2	2	2	9	2	3	144.816	12.1849	5.97529	22.6358	29.8296	6.13252	2.24952	1.12476	224.948
2	1	53	4	1	2	2	6	1	3	779.165	18.746	107.116	290.411	201.871	262.202	3.18682	18.1368	1680.83
5	2	54	4	5	2	1	9	2	3	89.8796	9.22585	42.2573	7.67227	72.062	1.89178	1.72088	1.72088	226.431
5	2	54	4	4	2	2	3	1	3	54.576	2.60101	29.525	4.6162	13.9423	69.1997	0.56238	0.28119	175.304
2	1	56	4	4	2	1	2	1	3	184.002	14.1973	0	13.6954	21.8935	21.2613	2.29451	3.72858	261.073
2	1	55	4	4	2	2	14	2	3	279.361	22.0969	5.03799	132.534	21.3939	206.091	4.31158	4.31158	675.138
5	1	53	4	2	2	2	3	1	3	166.556	23.3622	5.50664	19.0506	70.1101	17.2742	3.7492	5.6238	311.233
2	1	58	4	5	2	1	7	1	3	63.0355	14.3407	20.555	3.60908	56.4067	2.5058	1.14726	0.573628	162.174
6	2	58	4	4	2	2	3	1	3	53.3668	8.81062	24.0652	9.13868	33.5085	5.21795	1.49968	0.74984	136.357
2	2	73	6	4	2	2	4	1	3	12.318	13.9189	0	35.594	11.6694	2.19375	4.87396	4.12412	84.6921
2	2	66	5	4	2	1	9	2	3	118.299	12.3808	80.9293	48.8301	69.1222	7.43183	2.67693	1.33846	341.008
6	2	65	5	4	2	1	15	3	3	63.8089	50.3358	73.1375	4.23051	50.0968	6.36631	1.14726	0.573628	249.697
5	2	62	5	4	2	2	15	3	3	121.199	84.357	15.9341	8.13108	22.753	5.90921	2.24952	2.24952	262.782
5	1	62	5	4	2	2	11	2	3	30.0855	360.322	0	0.890435	0	0	3.93666	3.93666	399.171
5	1	59	4	1	2	2	20	3	3	15.5465	150.53	0	2.0152	0	2.21461	1.49968	1.49968	173.306
6	1	55	4	5	2	2	9	2	3	60.5484	8.81062	32.9227	11.4116	36.8125	6.63234	1.68714	1.40595	160.231
2	1	51	4	2	2	2	9	2	3	43.3712	0	42.4831	0.37492	32.6181	2.4965	0	0	121.344
5	1	51	4	5	2	2	4	1	3	128.737	18.6757	26.3499	23.8777	60.8777	8.92685	2.99936	1.59341	272.038
5	1	51	4	5	2	2	10	2	3	153.528	11.107	58.6047	48.5522	64.2519	97.023	2.24952	2.15579	437.472
2	1	62	5	4	2	1	9	2	3	119.582	6.2143	79.8179	133.368	47.7784	799.932	1.33846	0.669232	1188.7
5	2	65	5	4	2	2	13	2	3	122.288	8.03735	5.03799	6.46737	39.7415	6.20024	1.68714	0.84357	190.304
5	2	66	5	4	2	1	9	2	3	85.2074	11.8072	39.9149	79.7343	49.5949	2.1033	2.29451	2.29451	272.951
1	2	67	5	4	2	2	3	1	3	156.352	16.5199	63.6193	19.8239	30.9543	7.52558	2.99936	1.49968	299.294
2	1	73	6	4	2	2	10	2	3	21.2814	8.81062	16.5199	2.97593	35.1722	2.13704	1.49968	0.74984	89.1466
5	2	76	6	4	2	1	9	2	3	40.3155	6.74013	7.38546	3.84809	42.6397	1.70176	1.14726	0.573628	104.352
5	1	75	6	4	2	1	7	1	3	94.5291	10.1102	67.5686	2.86814	45.4361	3.51538	1.91209	0.956046	226.896
2	2	76	6	4	2	2	8	2	3	124.962	16.5199	31.7745	23.5497	20.9721	7.34937	2.99936	2.71817	230.845
5	2	77	6	5	2	1	19	3	3	361.848	17.7108	54.7337	53.3713	17.5913	10.6315	2.48572	2.48572	520.857
5	1	76	6	4	2	2	5	1	3	81.5008	8.90435	7.99049	177.923	36.6719	1.86523	1.8746	2.8119	319.542
2	1	77	6	4	2	2	10	2	3	65.3676	6.60797	45.8106	2.7416	43.5845	2.70036	1.12476	0.56238	168.5
2	2	78	6	5	2	2	11	2	3	92.584	9.91195	61.7447	14.2001	71.4926	4.56348	1.68714	1.68714	257.871
5	1	80	7	4	2	1	19	3	3	152.535	15.727	44.5996	7.31375	44.9581	6.09575	2.67693	1.33846	275.244
5	1	80	7	4	2	1	23	4	3	169.289	13.4803	0.717035	4.61292	28.9204	3.12914	2.29451	1.14726	223.59
5	1	80	7	4	2	1	10	2	3	247.728	6.74013	2.50962	1.60138	27.9644	1.5856	1.14726	0.573628	289.85
6	2	80	7	3	2	1	9	2	3	197.003	16.0616	41.6119	6.78793	54.7337	6.14738	4.01539	2.0077	328.369
5	2	82	7	5	2	2	17	3	3	36.0258	12.0209	49.7941	29.2672	56.238	9.73855	1.68714	0.84357	195.615
1	2	89	7	5	1	1	8	2	3	59.9728	11.2335	21.6545	7.43326	30.474	4.18175	1.91209	1.91209	138.774
5	2	69	5	5	2	1	8	2	3	391.799	30.1872	48.2803	336.218	48.0652	39.0012	4.2066	8.03079	905.788
5	1	50	4	5	2	2	11	2	3	157.29	15.4186	54.4806	6.51424	60.8308	8.50131	2.62444	1.31222	306.972
5	2	83	7	4	2	2	24	4	3	15.3495	19.6833	3.16339	100.713	2.8119	2.54571	2.62444	2.62444	149.516
5	2	70	6	4	2	1	15	3	3	257.928	25.8372	7.76788	9.75167	30.5935	7.78532	4.39781	4.39781	348.459
2	2	61	5	4	2	1	8	2	3	85.8811	12.7473	20.8549	17.6212	32.7586	8.94255	2.06206	2.27295	183.141
2	2	73	6	4	2	1	5	1	3	354.89	22.5388	35.6127	284.997	33.7484	34.7002	4.39781	6.59672	777.482
2	2	73	6	4	2	2	10	2	3	403.647	29.525	40.4211	228.326	64.0879	10.6833	3.93666	3.93666	784.564
1	2	85	7	4	2	1	10	2	3	86.8853	14.3407	21.033	18.8819	30.8803	6.60246	2.48572	2.48572	183.595
5	1	73	6	4	2	1	13	2	3	62.2562	9.84165	0.702975	64.744	2.46041	6.1194	1.31222	1.31222	148.749
5	1	66	5	4	2	2	18	3	3	96.4208	21.7219	34.9379	8.13108	75.5933	7.47919	1.68714	1.54655	247.518
5	1	63	5	4	2	1	11	2	3	201.394	20.4355	33.8201	5.28216	52.8455	8.63884	2.86814	1.43407	326.719
5	1	64	5	4	2	1	8	2	3	221.124	11.9745	41.9465	108.487	44.241	19.0064	2.29451	3.44177	452.516
5	1	82	7	4	2	2	14	2	3	356.829	37.3983	24.3932	199.2	83.6775	8.54256	5.24888	5.06142	720.351
2	1	79	6	4	2	2	17	3	3	49.2649	18.3855	2.47497	40.8724	27.6018	136.864	2.4514	2.4514	280.366
2	1	79	6	4	2	2	13	2	3	134.063	14.402	57.2779	6.85921	89.8768	6.7456	2.4514	1.88569	313.562
6	1	60	5	3	2	1	6	1	3	202.841	20.0053	15.6553	35.4215	50.0251	16.4048	3.05935	5.52117	348.933
5	2	82	7	1	2	1	12	2	3	11.4996	14.3407	4.0632	114.487	2.86814	7.41892	1.91209	1.91209	158.501
5	2	80	7	1	2	2	14	2	3	69.1114	8.01392	32.8524	79.0847	40.093	3.26555	1.68714	2.10893	236.217
5	1	80	7	1	2	1	23	4	3	19.1592	30.1155	3.22666	57.1955	0	218.336	4.01539	4.01539	336.064
5	1	80	7	1	2	1	25	4	3	20.1131	28.6814	2.50962	39.9388	20.1248	137.575	3.82419	3.82419	256.591
3	1	52	4	1	2	1	17	3	3	62.7097	9.01074	67.1145	4.92364	97.0626	2.28806	1.91209	0.956046	245.977
2	1	52	4	1	2	1	6	1	3	98.3886	21.511	3.22666	47.4199	0	196.136	2.86814	2.86814	372.419
2	1	50	4	5	2	2	11	2	3	178.753	25.9867	87.7547	7.92019	85.2006	8.51303	2.06206	1.03103	397.221
5	2	60	5	4	2	1	10	2	3	90.8732	8.98684	54.3751	5.83188	63.2425	5.97577	1.72088	0.860442	231.867
4	1	84	7	4	2	1	15	3	3	94.9842	14.9621	32.3861	3.48957	60.9719	6.51904	2.48572	2.84424	218.643
4	1	60	5	4	2	1	10	2	3	191.684	24.9289	32.2905	11.1857	83.7975	14.6409	4.2066	4.30221	367.037
5	1	29	1	5	2	1	6	1	3	199.973	23.6382	19.9814	9.10634	98.2816	13.9874	4.2066	4.78023	373.955
2	2	27	1	2	2	2	13	2	3	145.998	9.91195	23.6903	13.9189	61.4166	4.25042	1.68714	1.68714	262.561
2	1	36	2	2	2	2	8	2	3	83.1465	9.91195	25.0962	11.1773	16.0513	4.39313	1.68714	1.68714	153.151
5	2	38	2	5	2	1	7	1	3	66.2791	10.1102	17.8064	2.17501	35.9951	3.56079	1.72088	1.72088	139.368
5	1	39	2	5	2	1	9	2	3	86.9127	16.8503	15.1772	15.9421	36.7122	6.5733	2.86814	2.86814	183.904
2	1	38	2	5	2	1	16	3	3	60.7046	8.98684	3.34616	5.42556	35.6127	2.5634	1.52967	1.52967	119.699
5	1	38	2	5	2	1	8	2	3	95.4891	9.91195	21.9094	2.13236	53.2152	3.77123	1.68714	1.68714	189.804
2	2	65	5	4	2	2	10	2	3	68.582	8.81062	30.4623	7.61557	35.2894	3.57791	1.68714	0.84357	156.868
5	1	65	5	5	2	2	11	2	3	83.1086	10.2535	29.1104	21.0962	41.3674	5.72897	1.88569	0.942847	193.494
2	1	65	5	5	2	2	7	1	3	98.4664	12.1863	18.8805	12.9406	31.9389	6.65885	2.26283	1.13142	184.466
2	1	66	5	4	2	1	8	2	3	84.3613	13.4803	28.6814	17.3761	29.2789	4.97694	2.48572	1.24286	181.884
5	2	66	5	5	2	1	9	2	3	92.1794	11.2335	6.95524	20.5789	51.8894	6.08763	2.1033	1.05165	192.079
5	1	66	5	4	2	1	9	2	3	74.1818	14.7709	57.8408	13.289	46.2726	6.12252	1.33846	0.669232	214.485
5	2	66	5	4	2	1	9	2	3	25.4631	4.49342	4.66073	1.21896	42.329	2.78066	0.764837	0.382419	82.0931
1	2	66	5	4	2	1	5	1	3	78.5784	10.1102	44.9581	7.02694	51.4114	3.51921	1.91209	0.956046	198.472
5	2	66	5	4	2	1	9	2	3	121.366	15.727	14.8426	21.5827	30.4023	9.69049	2.86814	1.43407	217.914
3	1	67	5	4	2	2	15	3	3	103.568	21.0893	6.91259	51.9499	33.9537	153.526	2.8119	2.8119	376.623
5	1	67	5	5	2	2	12	2	3	59.8105	21.0893	5.15515	49.0911	7.02975	84.7795	2.8119	2.8119	232.579
5	1	70	6	4	2	1	9	2	3	292.165	17.0654	31.3105	132.066	155.334	27.047	0	3.17885	658.166
1	1	70	6	4	2	1	11	2	3	45.4581	13.4803	11.2335	17.2566	58.032	8.09054	2.29451	1.14726	156.993
2	2	70	6	4	2	2	8	2	3	98.2874	8.81062	24.487	7.84989	25.682	3.7792	1.49968	0.74984	171.146
2	1	70	6	4	2	1	6	1	3	160.575	17.3635	14.6922	25.3071	25.518	5.41478	2.43698	2.43698	253.745
2	2	70	6	4	2	2	15	3	3	84.918	11.0133	35.758	9.56046	16.0513	6.34318	1.8746	0.9373	166.456
2	2	70	6	4	2	2	9	2	3	391.421	14.739	5.97529	182.633	24.2526	2.13822	3.18682	3.18682	627.533
5	2	70	6	5	2	2	12	2	3	408.431	15.9341	49.4895	290.516	64.6737	21.6676	3.18682	3.18682	857.085
5	1	72	6	4	2	2	17	3	3	83.2269	6.81886	17.5978	13.5674	29.1735	4.36618	1.8746	0.9373	157.563
5	2	72	6	5	2	2	4	1	3	116.004	11.6442	128.345	147.108	110.926	63.4425	2.4514	5.60994	585.531
2	2	73	6	4	2	1	10	2	3	36.9734	6.74013	21.511	3.87199	37.8833	5.87849	1.14726	0.669232	114.675
5	2	73	6	4	2	1	38	6	3	63.9382	7.55277	23.0646	8.77173	41.0144	3.73097	1.72088	0.860442	150.654
5	1	73	6	4	1	1	25	4	3	106.372	17.0654	9.32145	6.1904	17.9259	3.88872	2.29451	1.14726	164.206
2	2	73	6	4	2	1	10	2	3	1.10925	38.1463	2.86814	14.4602	4.2066	6.16076	5.35386	5.35386	77.6589
2	2	73	6	4	2	1	24	4	3	122.595	8.1742	36.4493	76.2208	53.8015	4.60289	1.91209	1.91209	305.667
2	2	73	6	4	2	1	9	2	3	12.6724	6.74013	37.6443	2.17501	71.2494	2.30192	1.14726	0.573628	134.504
5	2	73	6	4	2	1	13	2	3	186.02	13.2173	26.8888	19.5272	47.7784	9.39172	2.1033	2.0077	306.935
3	2	73	6	5	2	2	11	2	3	75.5597	7.75491	13.5534	13.5063	22.6283	5.64435	1.31999	1.31999	141.287
2	2	76	6	4	2	1	10	2	3	81.9547	82.0138	106.501	13.6846	131.972	10.2873	1.8746	1.8746	430.162
2	1	78	6	4	2	1	11	2	3	99.3409	5.61677	1.31456	2.34231	27.1756	0.328641	0.956046	1.43407	138.509
5	1	78	6	4	2	1	6	1	3	108.569	12.1146	23.4325	4.70993	29.6421	4.55903	2.06206	1.78087	186.87
2	2	59	4	4	2	2	14	2	3	69.9411	9.91195	32.1025	8.83406	28.822	6.93907	1.68714	1.68714	159.925
1	2	58	4	4	2	2	7	1	3	29.641	14.6922	62.0024	2.10893	51.6921	6.65179	2.06206	2.06206	170.913
2	2	59	4	2	2	2	8	2	3	62.129	13.2159	35.9923	17.012	21.0893	5.73347	2.43698	1.21849	158.827
2	1	59	4	2	2	2	4	1	3	38.012	7.7093	17.9259	5.31918	31.8916	2.53329	1.31222	1.31222	106.016
5	2	61	5	4	2	2	6	1	3	86.0287	8.81062	35.4768	2.13236	29.7827	5.95139	1.49968	0.74984	170.432
2	2	63	5	4	2	2	8	2	3	51.4709	13.2628	31.9854	12.0209	26.7599	8.07836	2.43698	2.85877	148.874
2	2	62	5	4	2	2	7	1	3	124.34	15.4186	28.4002	3.93666	62.4476	5.46048	2.62444	2.62444	245.252
5	1	64	5	4	2	2	13	2	3	56.7866	12.3255	11.4819	10.7087	32.1025	9.57851	2.06206	2.69474	137.741
2	1	63	5	4	2	2	7	1	3	103.224	14.3173	14.6453	15.7232	31.1652	10.1268	2.43698	2.92906	194.568
1	1	61	5	2	2	2	8	2	3	81.8828	11.5757	24.0418	20.1637	56.0037	6.75348	2.06206	1.03103	203.514
5	2	61	5	1	2	2	10	2	3	51.7484	6.60797	21.0893	8.17795	23.081	6.34974	1.12476	1.12476	119.304
4	1	62	5	1	2	2	11	2	3	48.6923	10.404	11.1304	4.78023	39.6244	3.90222	1.68714	1.68714	121.908
5	2	64	5	5	2	2	8	2	3	178.153	17.6212	41.5927	8.27168	77.8194	9.31114	2.99936	2.99936	338.768
5	2	72	6	4	2	2	10	2	3	68.4464	10.404	27.5566	9.18554	22.4952	3.7656	1.68714	1.68714	145.228
5	2	68	5	4	2	2	20	3	3	173.764	13.2159	3.39771	3.56174	38.898	4.24503	2.24952	2.24952	241.582
2	2	68	5	4	2	2	7	1	3	70.5356	13.2159	38.195	6.02216	43.1393	4.47256	2.24952	2.24952	180.08
2	2	66	5	4	2	2	9	2	3	95.4251	12.1146	13.708	14.6688	20.9252	6.06176	2.06206	2.06206	167.028
2	2	66	5	4	2	2	12	2	3	156.77	11.9974	12.2083	9.13868	67.7434	8.33213	2.99936	2.99936	272.189
5	1	73	6	4	2	2	9	2	3	201.688	16.3325	22.0266	179.587	56.074	21.3348	3.18682	4.78023	505.009
2	1	70	6	4	2	2	8	2	3	87.5785	11.0133	16.6371	3.11652	44.3109	4.48779	1.8746	1.0779	170.097
2	1	64	5	4	2	2	4	1	3	102.603	11.0133	25.1899	1.8746	44.9201	3.38014	1.8746	1.8746	192.731
2	1	67	5	4	2	2	11	2	3	108.105	12.1146	21.4642	8.13108	19.3787	5.60482	2.06206	2.06206	178.923
2	1	65	5	4	2	2	12	2	3	161.918	14.3876	45.6934	5.92842	114.702	10.7583	2.43698	2.78847	358.613
5	2	74	6	2	2	2	9	2	3	87.2285	8.81062	1.17163	7.61557	44.428	2.84025	1.68714	0.84357	154.625
5	2	70	6	1	2	2	12	2	3	95.9043	9.91195	14.6453	14.5047	26.6428	6.75536	1.68714	1.89803	171.95
5	2	74	6	4	2	2	8	2	3	63.6471	21.0893	20.5034	5.57694	33.9068	3.39115	1.68714	1.75744	151.559
5	2	76	6	4	2	2	13	2	3	84.7341	11.0133	12.3021	8.01392	22.4952	4.85545	1.8746	1.8746	147.163
2	2	78	6	4	2	2	7	1	3	98.8261	12.1615	38.5465	17.6447	38.2184	8.73869	2.24952	2.24952	218.635
2	2	78	6	4	2	2	10	2	3	115.823	9.79479	50.0284	114.819	55.207	16.5701	2.06206	3.09309	367.397
5	1	78	6	4	2	2	14	2	3	118.671	13.2159	28.0253	5.57694	73.953	5.31215	2.24952	2.24952	249.253
5	1	88	7	4	2	2	21	3	3	37.5326	7.02975	25.2134	8.506	42.9049	4.73266	1.12476	0.56238	127.606
5	1	88	7	4	2	2	20	3	3	116.381	13.2159	13.005	4.31158	60.3621	5.26482	2.24952	2.24952	217.04
